# Supplementary material for: R2 and Non-Site-Specific R2-Like Retrotransposons of the German Cockroach, Blattella germanica
Source: MDPI journal article supplement (doi:10.3390/genes11101202), 2020-10-15
Supplement: s1 [file s1]

## >Blag\_1

GGCCTATGCCTATATCTGACCAAGTTTCATTAACGCTGTAAGTAACCGAAACAAACAGCAATCCGACCATACTACTATCAACGTCGATTCTTCACAC  
GCTGAGCTAGGCGCTATCAACAAACGCAAGTCAGTAGGCCAAAACCCCTTGTCCTCCATTGTGGGGGCTGTGTTTAAAGGTACTCATGGTGTAGCCATCCACA  
TCAGTCGTGCACACCCCCCGAACACAGACAATCCATTCTGACTAGGCAATCAAGAAACAAACAGTCGCACATCTAGTGAGCCACAGCTTCGAAATCC  
AACTGATAATGATCAATCTATCGTCGATAGACAAGTTGATGTAACGTAAATTAATGATTGTTTCAGTCCTAAATGATGACCTCGCAACTTACAAAAAT  
GAAATGCAAAAAATGAAAATCTGAAATCTTCAAAAAATACCAACACGAGTTTCAATACCAAAGTCGAGGAATTCCTTAATTTCTCGCTCGAGCTGT  
TACATTTACTTCTCTGGTCTTAAACACCCAGCAGTACGCTTTTACGAAGCAGCAGCTCAGCGCCGACAGTTCAGCAATCAGGTTCTGTATAAAAAATC  
CAGCAATCTGCAAGCAGGAACCAAAAGGGCTCGAGACAAGAGCGCGAATTGTATGAATACAGAAACGCAATTCCTTTTACCAACGAGAGGAGA  
AAAGCTGTTAGATCAGCACTGAACGATAGGCACACGGCTTGTAAAGTTGATATTAACAAAAATCTTCAACTATTTTTCTGCTCTCGACTATCTACTGAGA  
ATTCTTGCGAACGCTCCGAGATACCTTCTTCCAATGTCACCGAAGCCGAGCGAGCTGTTTATAGACAGACAGAGGATTCGTTATCACTAAACAGAGGT  
GCCAGTAGCTGTAAGCAAGATAGCTGCTGACACTGCTCCAGGTCCTGACCACGTGCTTGTTCAGAGCATATAAAGATGCTACCTGCTATGAAATTTATA  
GCCAAGATAGCTATACCACCATGCTACAACTCTTTTGTACCAGAATGCCACAGAAAGCAGCAACTGTGTTAATTTATAAAGGTGGAGATGATAAGG  
ACCTTGGTAACTGGAGACCTATAACAACTCTGTTCTGTGGTGAGACGGATAATTGAGCGAATACTCGATGCACGCTCTACGAGCATTAGTGAACCTATG  
CGAAATCAAAGAGGATTTACTAATCTCTCTGTACCTTAATAAACACATCTATTTTGAATCCATTTTGGTTGCCGCGAAGTCGAAGAAAAAAGAT  
TGTAACAATAGTTTCTTGGATATAAGTAAGGCTTTCGACAATGTGGTGCTAAACCTACAGAACAGCTTGTCTGCATTAGAATACCTTTCAAT  
TATCATTTTGTATATTACAGCTCGAGAGGGGTAATAAACCCCAATAGAAACAGGAAGATGTAGAATCAACCAATAGACATAAGAGAGGAATCAT  
GCAGGGTTACCAGCTCTCTCCCATCTTTTATAATATATCTACTGACCATATCTCGATGAACCTTCCAATCAAGAGTTGCAGGATGAATATGGATTTC  
TCAGTATACCAGGCTCTATCAACATAACAGCATATAGCCTTTGCTGATGACACGTTGATTGCTGCTTAAAGATGATGAATCAGCAGCAATCTCTGTAG  
AACTTGCCATFGAGTAGATTTAAAGAGATTGGATTAGACATAAATACAGACAATGTAGATGCATCTCAATATCAAGGATGTGTGCAGATATAAACCC  
TCTTAATTTAACTTCTGGTCAAACAATTGCATCAATTACTCTGTATGAAAACATAAAAATACCTTGGTGTGAGTTAATGCTACTATCCTTGATGCA  
GCCAATCTCTATAGAAGAATTTAAAAATAACTGGATAGACTTGCTTCAACACTTTTATACAAACCCACCGAAATACACTGTTTTATGTAGCTTTA  
TCTGTCTCTATCTGATCTACAAATTTCAAACAACCACTTAAAGAAGCTACCTGCTTAAATTTCTTCCGATGCAGAGCTTCTCATTAAAAACCAATC  
GAAGAGGTTACTTCAACTTCCAAAGATACACCTGACAGTATGCTGTATACCGATAGAAAAATCAAAAGGATTGGGACTCTTAAATTTCCAGCTGGGAA  
GCTTTTTTGCAGCATATTAATGCTTGTGAGAGATTACAACAATCCCAAAATATACATGTTAATACCTGCCGCAACTTGTCCACGAAATTAAGACTT  
GCATAGAAAAATCGGGGCTTGAGACCACCGAATCCGAAACATACAGTGTTAAAAAAATAGGAAAGAAATTACGAGAGCAGAGCTTCCAATCTGTGTG  
CTCTTTAAGCCGAAAGGTAAGGTTGCATATTATACAAAGAGCACACTCCGGGCAACAATGGATTAGGCAACCCAGCTCGCCTTAGTAGTAGTAT  
TGGAGTACTGCTCTCAAAATGACTGCCAACGCTGTGCCCTTACAGAGCTGTTCTCTGGAAGGTCCTGAGAGCAAAACCACTGTGCGCGTGTGAGCAGTG  
AGATGGAAACACTTGCACATGTCTTGGGTGCCGTGCTCTTACGCGAGTCTCTGCGAAATTCACGACACCACCATAAGATCTGTGATCGCCGATGC  
TCTAAGAAAAAAGGGACTTGTGTGACGAGGAAGTTCAGCGAATCTTACGAATGATCTTCTCGCGCATGATATGCTTGCATCTCTCCAGG  
TCTACATCCGCTTATCTGATCGACCCGACGCTCCGATTGTGAGACAGCAGCAACAACGCCGCCGGAAGTAAATGCTGAAAAATGCAGAATCTACAGCC  
CCACAGTTCCTATTCTATCTGGAATAATACCAACTCACTCTCATAAGAGTTATTGGAATATTGGAATTTGGGCTCTGGGCGCAACAATCTGGCTTCTTGT  
GAAATCTGCAGGAAATTCAGCTCAATAATAATCTAATTAGAGATGTTTCCACGCTGCCATCAAAGGCTCATTTGGCCATTTTAAAGGAATCATCTA  
TACTCTCTTTGTAAAAATACTTATAATTTTATGCCAGACTATTATTTCTATACCTGGAATATTGTATTATTTTATGTATTTCTAAATTTATTT  
TGTTTCTTCGTCCCAATCATTTAAACACTTTCAGTTTGCCATTATATTATGCTTTTGCCACTGTGGCAGTCCCTTAGTTGGGAAAGCCGAAGGTTCT  
ACCTTCTATAATAA

## >ORF\_Blag\_1

MNTENEQSDHHTINVDFSHAEEVGLSQTQVSSQNPCPHCGGLPKFGTHGVAIHISRAHPPEHRQSILTRQSRTKQSTSSEPOLRNPDTNDQSIDVRQV  
 DVTEIDECYKTNDDLATYKNEMQKVALNDRFSKNNNTDSFNTKCYEQEFLNFLARAVHLLPGPKHPAVRFYEARRQRRQFSNQVRKYQSSNPBERGTRKARD  
 KRRELYEYQKTQFLFYNQRRKAKWSALNDRHTACKVDINKIFNYFSSRLSTENSERCAPAYSNVTEPEARVLDDSTEDSVITKQEVAVAVKIAADTA  
 PGPDPHVLVRALKDATCYEIIAKIATMTMLQHSFVPECLQKARTVLIYKGGDDKDLGNWRPITICSVVRRIIERILDLARLALVNLCEQNGRGTNSPGT  
 LINTSILESILVAASKKKKDKTIVFLDISKAFDNVGNHNLQNSLSALRIPFKLSSLLQLQGRGNKTQIETGRCRTKPIDIKRGIOMQGSPLSPILYNI  
 STDHILDELSNLQELQDEYGFVSVPGLSNTAFDNFGADDTLIAAKSMNSARILVELAMSRFKEIGLDINTQIGRCRITIKGCVRYNPMLNDSGTIASI  
 TPDENIKYLGVSYNATILDAANSIEELKNKLDRLASTPLLQPHQKYTVLCSPICTPLIYKFQTTPLKPLPAKFLSDADGVLDLKTTLKEVLQLPTDTPD  
 SMLYTRDKYKGLGLFNSSWEAFLQHINACQRLQSQNIHVNTCRNLSHEIKTCIENLGETTESETYSVKKIRKELRERAFQSWCSLSQKKGKVILY  
 KEHTPANKWTRQPDRLSSSDWRLALKMTANVCPRAVPGRSRDGNHCRCSSEMETLAHLVLCACPFSSELNSRHHHRSVIADALRKKGLVVEEV  
 HGISTNGSSRRIDMLAIPPGSTSAYIIDPTVRFETDEQQPAEVNAEKKCRINYNTPCFYLEKYQLTSIEVIGLLVGARGTIPGGFVKFCRKFQLNNNL  
 IRDVSHAAIKGSLATLIRNHLYSLC

## >Blag\_2

GAATCAGTGTAGGTTGAGTGTCTGTGTAAAAAGATGACGTGCGAATGCGACCCCGCTGTTACTTAAACATCATTATACTTGTGTGATATCTTCAAACACTACTAC  
AATTTATGTTGGAAATTTTCTCCGTAAGACGTGACTTCTCTCCTTAGACATTGTTTACTC**ATG**ATATCAGATTCTCGAGGACCTTCGTTACCATCTAA  
TGACGGTGAAGACATTTTCTTAGTCTCTTTCGCAAGATATGTGGAAAAAGTTTACTAGACATGGAATTAATATCCATATTGCTAGAAGCCATAGACAT  
TCCCAAGTTTGTATAGACATGTATAAGCCTACTGATTCAATTTTATCAGAGACTGTAAACTTCTCACTTTCGACCCATTTGAATGCCAGGATAATA  
TCCATCTTAAATACTAATTCATCTAACAATGAGAAAGCTATTTCGTAACAATTCCAATGCATCAAGTATACATTAATAGATGGTTTCATTAATTGGTAC  
TCCCTCTGACTCTTCTCCAGCTGTTTTCGCAAGTCAAGTGTCCCATTTGTGGAGGTTTCATTTAACCGGATCTAAGGGTTCGAATATTCATATTAGTTCGA  
TCGCATCCCCACATTCATGATGACATAGGTTTACAATTTAACTAAAAATGCGTCCGACGCGCTCTTGATGAGCAAGCTGATAGGGGTTCGTTCTTA  
GTAATTCAAGAACCCAGTCAACCTGACTCAGGTTTAAACATAGCCCTGAATGAGTGGAAAAACAAAATTTGTTGCGACTGCAACTGCAAAATGACTCTGA  
TTTCGATAACATGTTCCAGGATTTTTCACACTTCTTAAGTACTAGCATCAATCTTTTACCCTGGACCTCGACATCCCGCAACCAAGTACTATGAAGCC  
CGCAGGAAACCGACGTCTCGCAACAGCAGAAAAAGAACTACAATTAAGTCTCCCAACCCCATCAGTGGCCAGAAAAAGCCCGTGAGGAAGAGGAAATGCA  
AATGACGATTATCAACTGCGCAATCAACATTTCTATAATCAGAGAGCTGAAGGCCGCTCGCTGAGTTCTCGATTCTCAGACAGCTCTTTGTAATAATCGA  
TCTCACTAAAGTTTCATGAAAAATTTGCTGCGCAGTTTTCATTGAAAAATCCACACATCAGGTCAAATTACCCTTCCAAACTAGACGTGGAACGT  
ATAGAACTAGATGAGACATACGATCCTACTATCTCCAAAGAAGACATCGCTATTGACGCCCAAAAATGCAAGTGGAACACAGCCCGCCGCGCTGATC  
ACGTTTCTTGTTCGAGTCTCCGCAATGAGATTGTGATGAAATTTAGCAATAAATGCTCAAGAATGCTTTTCTCTGGAATCGTTCTCGTGTGCTT  
CAAAACAGCTCCGGACTGTCTTAATACATAAAGCTGCGAGATGTTAACTCCTCGCACTGGAGACCGATCACCAATTTGTTCTGTACTTAGAGAGTT  
ATTGAACGAGTTCTGGACAAACATTTACGTACTTTTGTAGCTTCAATGAACATCAGAGAGGCTTTACTAATAATTCAGGCACCTCTTATCAACACGT  
CTATCCTTAAGAAAAGTTTAAAAACCCAGAAAGCAACAAAGAAGATGTTACTGTAGTATTTTATGATATATCGAAGGCTTTCGATAATATTGGGCA  
CAAGCATTTAGATTTAAACATTATCAGCAGAACCCTACCTGTCAAACCTATAAGATCTTATCATAAATCAAAAATCAACAAATCACCAAGATATCCAA  
ACATCTCTAGGTCAAAACAAAGAGCTATTAACTACAGCGTGGTGTATGCAAGGCTCCCTTTATCGCCAAACATATATAATCTTGCTCAGAGATTTCA  
TCTTCGATGAACCTACTGAATTGAGTCTTTTGCAACAAATACGAAAAATCCATCTCTCCTCAGTTATCTTCTCTTAGCATCATGGGCTTCGCTGATGA  
CACTCTCCTCATGGGAAAAAATCAGAAACTACTCTCGAATTATACATATTGCACTACAGCGTTTCAAGAAATAGGCTTACAAGATAAATCCTCAA  
AAATCGCCGGGAATATCTATAAAAAAGGAAAACTGTTTGAAGAGGTTCTTCATATCAATGAAAAATTCACCAATTGAAGACCAATAAATCAAGAG  
AAGTTTCGTTACCTTGGGGCCCCCTTCAAGATACAGCTCTCTTTGATAAAGACTCTACTATAAAGCAGCTGCATAAGAAATTAGAACTATTAGGCTT  
ATCCCTTTTACTAAAACTGATCAAAAATTCCTAGTCTTAAATACCGCTATTGTGCCAACCTTATTTATCGCTTTCAAACCCAGATCTACAAACC  
ATTCCTTTGCGAGTTTATACATAGCCGATAAATTAGTCAGAGACATATGAAGAATATTTTACAATTGCTTACCGATATCCCTGATAGTACTCTAT  
ATTGCGCTTGTCAAAACAAAGGCTTGGTCTTTTAAAGGCAGCTTGGGAACTACTCTCCACATATCAATGCTTGTAACTCTCTCTCAATCACA  
GAACCTCCCATGTCTTCACTGTGTACTCTGCAAGCGAATATCTTACTGTCTCCAACTCCTCAACATCAAAATACCGATCTACATATTAAACAAAC

CACACAGGCCCTCATTGACACAAGGAAAATCCGAAACGAACCTTCGACTTCGAGAAACCCGAGAATTGGAGTCATCTACCTCACAAAGGAGTCGGTATTG  
ATCTTTTATAAGGAATATACTCCTGCCAACAGCTGGATAAGGCATCATAGAGGACTTTCTTGCAGTGAATGGCGCGAGGCAATCAAAATGCAAGCTAA  
TGTATCCGCAGTGAGAACCGTTCCGGGCAGATCTCTAGACGGCAACCTCTGTGCGAGATGCAACAGAGAGAAAGAAACACTTGGCCACGCTCTTGGGA  
TCCTGTCCCTATGTTGAAACTACTGAGGAATGCCGCCCATCATAAATTGCGATCCTTCATAGCTGAACAACCTTCGCAGGAAGGGATATACCGTTTACG  
AAGAAATCCATGGAATAGCTACTCAAGGCAGTACACGTCGAATTGACATTTTAGCCTTTCAACCAAAACAGTACGAAAGGATATATAATTGACCCCAAC  
TATCAGGTTTCGAACACCACACTAACCAACCTGCTGAGGTGAATGCCGAAAAACAGAACATTATAATCCTTACCATTCCATACACTACAAAAGTCAATAC  
CATCTACAAGACATCACAGTTATAGGGCTTATGGTAGGAGCCCGTGGCACTATTCCATCCCTGTTTCGCCAAATTTTGGAGTGAATTCACACCTGCCTA  
AGAAGAAAATCTATGATGTTGTCCACTACCTTACGTGGATCTGTCCAAATTCTACGATGTCATCTCTTTTGGTCTCTTAATATTTCATCAACAGAAG  
AATCACCAAAATTTGCTACTTGATATTACCTTACAACACCTTGTACAAAATTTGTAATTTTTATTTATTTATGTTATTACAGCTATGTTATTTGTAA  
CTCTAGTATATAATGCATACGTTTACTTTGTCCATAGTGGAACCTCGCAACTGCGAGAAGTTGTTGATTTCGTTCAATAAATATATATAATATATA  
TTTAT

>ORF\_Blag\_2

MISDSGGPSPSPNDGKTIALVSKICGKSFTRHGINIHIAHRSHRSQVLIDIDKPTDSILSETVNFSPSPDIECQDNIHLNNTSSNNEKVIRNNSNA  
SSIHLIDGSLIGTPSDSSPAVSAQCPCPHCGGSFNGSKGVNIHISRSHPHIHRSTLVNLTKNASQPLLDEQADRGSSSNSESSQPDSGFNIALNEWK  
TKFVRTATANDSDFDNMVQDFSHFLSTSRINLLPGPRHPATKYIEARRKRLATAEKNYNKSNNPIRASKKAREKRCKYDYQLTQYQFYNQRRKAVR  
RVLDSTAPSKIDLTKVHENFAASFSENPHIRSNYPYSKLTDVERIELDETYDPTISKEDIAIAAHKIAVDTPAGPDHVLVRVIRNEIVYEILAI  
TRMLSSGIVPRCFKTTARTVLIHKAADVNLISNWRPITICSVLRRVIERVLDKHLRTFVSFNEHQRGFTNNSGTLINTSILRKVLKTTKDNKEDVTVV  
FLDISKAFDNIGHKHLDLTSLAEPIPAKLKDILNLQINNNTNIQTSLGQTKAINLRRGMVQGSPLSPTLYNLATDFIFDELTELSLLQYQKSI  
QLSSLSIMGFADDTLMLGKNSETTLELLHIALQRFQIEIGLVNPKQCTGISIKRGKLVVEVLHINEKFTIKTINNQEVEVRYLGAPFDNALFDKDV  
IKQLHKLELLASSPLKSDQKFLVLNTAICPTLIYRFQTTDLQTIPLQLFHTADKLVRSTLKDILQLPTDIPDSTLYSPCQNKGLGLFKAWEIYL  
QHINACNTLLKSQNSHVHLCTLQANISTCLQLLNTNTDLHINNHTGLIDTRKIRNELRLRETNWSHLPHKGVGDLYKYBTPANSWIRHHRGLS  
CSEWREAIKMQANVSAVRTVPGRSLDGNLCRRRCNREKETLGHVLGSCPYGEILRNARHHKLRSFIAEQLRRKGYTVYEEIHGIATQGSTRRIDILAF  
QPNTSKGYIIDPTIRFEHHTNQPAEVNAEKQNIYNPTIPYYSQYHLQDITVIGLMVGARGTIPSLFAKFWFSEFHLPKKKIYDVTTLRGSVQILR  
CHLFGP

>Blag\_3

TTGAGAAGGCTGTGGAATTATAAGTTTGTGATATTGCTATACTGGGACCTATTAATCTTTAATTATCAATATCTACTACATCTTTTGGAAATTATGT  
ATATGGATTATATATATATACTTAATAGCTGATGTGAAAGTATTAGTGTGGTTCCTTAACCAATATTATGTGAGAAATATTTTACTTCTTTTCAAG  
GTATGAATTCGTTACTTTTTGTGTTACATAGTAACGCCATTATATGCTTATTGTAATTAATTATTTTGTAAAATTATTATATAAAGACAAAGTATGC  
CTCTTATTATAAATGAGGATCATTCTAATATTGTCACTACTTTCTACAAGTACAGCTAATGATAATAAATGGAAATTCAAATAGTTTGATTACCAC  
AAATGCCATTACAAGCCAAGATCAAACTAAATTATGTACATTATGTGGTAAACGATTAAATCTCTAGCCATTCTAGTTAGTAAGGCCCATGGTGAA  
GCTTAGCAGGAAACAAATCTTCTACAAGTATGAATGTCCGTTAGAAATATGAAGACAAATGAAAAATCATATAATGTACAAATGCCAATTTCTATAACAG  
TTGCTGATGTTTCTTCTCCTGCAACTCAACAAATTTTGCAATTGAAAAAGCACTTGAAGAATGTATATTATCATCTGATCTTAACAGGTTTGAAGA  
AATTACTGTAGAAATAACAGCGTATTTATCTAAGGCTATAGCATCCCTCCCTGGACCAAAAACATCCGGCTACACGTTACTATAATGAAGAAAACTC  
CGCCAAACAATTCATGGGACTTCTACTCTAATACAAAAAATCCTGACAGCTTTATCCAAGCGAAAAAGGAAGGATAATAAACAAGTACCAGTATG  
AAGTAGCAAAATTTCAATTCTTAAATCAGAGCGTAAAGTTAGTGAGACAAATATGAAAAATCATATAATGTACAAATGCCAATTTCTATCCCTAT  
TATATTTCAACACTTTAACACATTTGTTTAACAATGAAATCCTTTTACGCCTATAGAGTCGATTCTCCAATGTCCACTGAAGAAGATATTGAAATC  
ACTGAAGATGAAATCAAAGCTGCAATGGCAAAAAATCAAAATTGACACTTCTGCTGGTATAGATCATGTCTTAGTTAGGACTATTAAAGAACTAAAA  
CATCTAAATTATTATGTTTGTGTTAACAATGCTATGCTTAAATTTGAAATATGCCCTGGAATATTAACACAGCCAGAAGTCTGCTGCTTTTAAAGG  
AGGCGATGAAACAAACTCTCTAATTTGAGACCAATCTCCATTTTCTGTTTAACTGGCTCTTGATGACACACTTAAGAATTTGGCTGATCCCAATGTTAGAG  
AAGTCTTTGGGTTTTCTTACATCCTGATCTTGAAAAAGGTGTCTGTCTTAGCTTTTGTCTGATGATATAGCCTTAATAAGTAAAGATGAGGCTTCTTT  
GCAGACATTAATCAATATGACTGTTTCAATTTAGATGCCATTGCTCTGAAAGTTAACCTTAAAAATGCAAGTTAATTAATATTAGAATGGCTTT  
CTAGAACAAGGACAAATATTGGTTGGAGGTCAAACATTAGAATTTATAAAACCGAGGAAATTTACAAATATTGGGTGTTACTTTTGAAGATGAA  
TTGTGTTGGACAAATCAACTTTAATCAAGAATTTTGAGAATGATTAATTAACATTACGAGTTTCCAATTTCTACTTACGATCCCAATTAATAT  
TGTCAATCAATATATCTGGTCAAGGCTCATATATCCTTTGCAAGTGTACTCCATTAGATAAAAATCCTCCTTCTCTTTTGCAGATATTGATAAATTA  
CTAAGGCTCTTCTATTAAGGAAATCATTGGCTTACCAAGTGATTGCCTACTGATATGCTGTATGCAGCGAGAAATGTCCTGGATTGGGTCTAATTA  
AAGCAGAATTGGGAAGCTTCAATACAGCACTTCAACATTGCAAGGACATTGTTAAACACGAATGATGACCATCTTCACTGCTCTAGAAATCTTGTAA  
AGAACAAACAAACTCACTCGCTCCAGCTAGACATCTTGTCAAGACAGGCTTCAAGAGTCCAGTAGATGGCTAGAAATGACGTACGTACGACAGA  
TCCTATGAGGCTTGGTGTAAACTCCACACAAAGGCAAAGGCGTTGAAGTGTTTAAACAAGTCCAGATTCAAATTCATGGCTGGTTAATAGAATAG  
GCCTTTCCACATCTGAATGGACTAACGCCATTAAAGATGTCTGCAATACAACAGCAGTAAGAACAATTCAGGAAGATCTAAACACACCACAAAATG  
TCGTCACCCTGGGTGTGAACATCAGGAACTCTTGGCCATGTCTTTGGAATGTGTGCGAAAGGTGAATTATTAAGGAACACTCGTCATATAAAGTG  
CGTTCCCTACATTGCCACTCACCTCCGTAAAGCCAATTGGGAGGTTTACGAGGAAGTACACTGTACATCGGAAGATGGAAGTCATAGAAGAGCAGACA  
TTTTGGCAATTGATAGGCAAGCTGGACGTGGACTCATTCTCGACCCGACCATCAGAATGGAACAAGATGGTGAACAGGCCATTCTGTGTTAACACAGA  
AAAGGAGACGATTTATCGTCCATGCATACCTCACTTCAGTGAGAGATATAACTTACCTGTAATGCATGGGCGGTGAAGGCTCTCCTCTTCGGTTCT  
CGTGGCACAGCTTATCAATGGACAGCAGACATATTAAGGGGATTAGGTATGTCTGTTATAAATTTGAAACTATGCTGTTCAATGATTTTGAAGATT  
CTATTCAAATCTCCAGAATCACTTATATAATCAAACCTAGACAAAAAATGTTTTTTTAAATTATTTTCAACATTTTAAATTCATTTTATTATCA  
AAATTCATCTGTTTTCTGGATCCAGAGGTCTCCCGATAAATCGGGCAGATGTTCTTTTTGAACCTTAGTAGT

>ORF\_Blag\_3

MPLINNHDSNIVTILSTSTANDNNGNSNSLITTNNAITSQDQTKLCTLCGRKFKSLAIHVSKAHGEAYRKKLSHKYECPLENTKDTDTDSPSSINPI  
TVADVSSPATQQILQFEKALEECILSSDLNRFEETIVEITAYLSKAIASLPGPKHPATRYYNARKLRQTIHGTSYNTKNPARLSKRKRKDNKQKYQ  
YEVAQFHYFNQRRKVVRQIMKNHNNVCCQISIPIFIQHFNTLFNNENPFTPIESIHFMSTEEDIEITDEIKEAAMAKIKIDTSAAGIDHVLVRTIKEL  
KTSKLLCLLTNAMLKFEICPGILKTARTVLLFKGGEDEKLSNWRPISIFSVIRRIIEKVIDRLLKSYIELSPHQRGFINVPGTHINTSIINGCLTRA  
KKEKRNCCTAFLDISKAYDNVVGHEHVKRCLLRTNMPNNLRDLVLNLLQDNKIQIESGFQKTKPIQVQKGVAQGSPLSPGLFNALALDDTLKELADPNV  
REVFGFSLHPDLEKVSVLAFADDIALISKDEASLQTLINMTVFNLDAIGLKVNPKKCKLINIKNGFLEQQQILVGGQTLEFIKPGEIIKYLGVTFED  
EIVLDKSTLKNFENDLNSLTVSNLLTPDQKLNIVNQYIWSRLIYPLQCTPLDKIPSPFLQDIDKLLRSSIKEIIGLPSDCPTDMLYGAARNVRGLGL  
IKAWEASIQHFNIARTLLNTNDDHLHCSRNLVKEQQQSLVQLDIPCNEQVLQKSSRWLRNLRLRTRSYEAWCKLPHKGKGVFVKQVPDSNSWLNVNR  
IGLSTSEWNTAIKMSCNTTAVRTIPGRSKHTTKCRHPGCEHQETLGHVLMGCAKGELLNRNTRHHKVRYSYIATHLRKANWEVYEEVHCTSEDGSHHRA  
DILAIDRQAGRGLILDPTIRMEQDGEQAIRVNTKETIYRPIPHFSERYNLPVNAWAVKGLLFGSRGTAYQWTADILKGLGMSVINLKLCCSMILK  
DSIQILLQNHLYNQ

>Blag\_4

AGGAGGCAGTGAAGTTGAATTGGCTTCTGTTGATGGGCTCTGTACATTTTCTATCATTTTTTCATGTTTTTCATGCGACTTGCTGCTTCGGAAGTGTTT  
TCAATTCAGTTTTACATGTATATCTATTACAGAAACGTATTAGTGGTGGTAACATTAAATTATTTTGTGAAAAATTTGTTTCATATATATTGAATACTT  
GAAGTGTGTTTATTTTACCTTAGTAACACATTAGTTACGTGCTTATATGGACATTTTATTGAAACTGAATAGGAAGAAATTTTATTTTAAATTATTTT  
ATTATTTTTTTTTTATTTATTTATTTATTTTATTTTATTATTCATATACCCGTAAAGATCTAATTAGGTACTTCATTATTATTTCATATTTTATTTATTGACT  
TAATTAATTAACCTGTAAATCGTAACATAACCAATTATATACCTGTAAAC**ATG**TCAGAAATCCATAGTGCTGGAATGAGTTCCTTTGCCTACCGCTTCTA  
GTCAGAAATAATCTTCATGTCCATATTGTGGAAAAATTTATCGTCGGTTAAGCACCCATATTACAAAATCACATCCTGAACAGCATCGAAAAAGTAT  
CGTTATGAGAAATACAAGTTCTGTTTCTCCTGTCGTACAACTGCTTCCAAGGATGATAATGTAAGTAATTTCTTCTGCTAACTAATTTCAGATGTT  
GGACATTTACATGAAATTAGATCTGAAGTGATGTCCTTCCGAGAAAAATTTTCATCTTTGCTACTTTTCAGATCCTTTGTCCTTCTAAATTTAATGAAA  
TATACAATGACTTTACTGATACACTAGTTACCATTAAATAGCAAACCTACCGGGACCAAAAAACCCCTTCTGTACGTTATTATGAATTACGACAACGGAA  
CAAAAAATATTTTGCAGCCAATGATAGGAAATATAAGATAGTAGCAACCCCTCAGAAAAAATCCAAGAGGGATAGAGCTAAGCGACGTGAAAAATTT  
CAGTATGAGCCTTCTCAATATCAATTTTATAATGAACGAAAAAATGTGTGTTAATTTCTTATTAATGATAATAAACCTAATGAACCTTGCAATATTC  
CTATTGGAGTTCTAAAGGAAGCAATGGAGGAAAAATGGGGGACACTTAATACTTCTATGTAGATCATTATAATAATTCTATGTACCCGCACTCACA  
GCAGAATGATTTAGATCAGCTCTTTACAATTCAGTGGAAGTTATTCAACAATCACTCAATAAAATGCGTACTGATTTCAGCACCTGGACCTGATAGA  
ATTTTAGTGCGAACGTTAAAAATTAACCGAATGCTCTCCAGTTATTGCTGTAATTTCTGAAAAATCATGCTTCAATGGGGTATGGTTCAGACAGAATGC  
GGGGGCAACGAATTTTCAAGGTTAAAGGCTAAAGCGAAGTGTGTTTTCAGGAGTGCACCCCTATGCCCAATCCCCAATCCCCAATCCCCAATCCCCAAT  
AATAGAGCGAGCGCTTGATTTCAGTTCTTAGACAGTATCTTACTCTCAATAATAACCAAGAGGATTTCGTTTCTCAACTTGGCACATCTATTAAACACA  
TCTCTAGTTGATGTTGTTTAAAGAAAGCAAAATTTGGAACAACGAAATGTTTCTATCGTTATGCTTGACGTGGCACAAGCTTTTGATTTCTGTTGGAT  
TAGACCATTTAGAAAAATGTTTAGATTCCCAATTTCTTCCAACATCACTTTGTACTTTAATAAAAAACGTTGACTAGAGGTAACTTTACACGGATCCA  
TAATGGTAACAAATTTCCGAACCCATTGAGCTTAAAGGGGTGTTTTCAGGAGTGCACCCCTATGCCCAATCCCCAATCCCCAATCCCCAATCCCCAAT  
ATTATTTAAAGAGTTGTCTGAGAAACAAATTACTGATAAATATGGTTTTTAAATTTTCTAATAAATTTAGATCACTTGTCCGGTGGCTGCATTTGCAGACG  
ATTTGGTTGTTATAGGGCAAAATATGCATGCTGCCCGAGAACTAGTCATGATGACAAAAATATTTACTTCAGCAAAATAGGTCTTCAGCTGAACATTGC  
AAAGTCCGTATCTATAAATATCGAACATGGAAAGTTACAGGACAAGGAATTACTTCTTTATAGTGGTTATGCTATTAGAGGCATTACAAAAGAGGAA  
AAAAATGATGTTAGGATTTCTTTTAAATGATGAAATAAATTTTGACCGTGAGTCATTGTAATTAACCTAGTCTAAGAAATGATCTCCAAATTTAGTAT  
CAACTCCAATGCTTCGTCCAGACCAGAAGTTAAATATAGTCAATCAATATATATGGCCCAATTTATATATGCACCTCCAATGGTTCTGTACATAA  
ACTGCCTCTAACATTTTGGAGATGTAGACAAATTAATACGTAGCGCCGTAAAGGAAATGCTGCTTTTACCATCAGATGTACCAAAATAGCATGTTA  
TATTCGGCAAAACAAATTTCCGGGTCTAGGACTAGTACGAGCTTCTGGGAAGCATTTCTCCAAAATTTGTAATACTGTTATAAAATTTATTACTGGCTG  
ACAATGATATGTGAATGCTGTGAGACCTTTATTAAACCACTCCAGTACCTGTCAGTATGATATGTTTCCATCAGAGTATTCGAAATTCGAAATC  
AATAACACGATCATTTTCGAGAAAACTTCGTCGTCGGGAATTCGAACCTTTGGAGTAATTTACCAGGGAAAGGAAGAGGTGTTGTTTTGTACAGTGAA  
GTTCCAAAAGCCAATAAATGGATTGCCAATAAATCAGGACTATCTACTTCAGAATGGGTCTCTTCTTTGAAGATGAATGTCAATGTTGCGGCGGTAC  
GGGCAATTTCCCGGCGAGGTCTTTGGACGGATCCCGGTGCAGATATGGCTGCCCGGAGACCGGAAACTCTTGCCACGTCCTCAAGGCCAATGCGATCACGG  
GTTGCTACTGCTAATGCTCGTCACCAACCAAGTACGGTCTCTCATTTGCTTCTGCTTTAAGAAAGAAAGGTTGGGAGGTAGAAGAAGAAATTAGTTGT  
ATAGCAACAAATGGCTCCACTAGAAGAGTTGATATATTGGCGTACTCCAAGACCACGAGAATTGGTTATATTATAGATCCTACCATCCGATATGAGA  
AGAATGCCGATCAATCTGAAGAAGTTGATCAGGAGAAAAAATAATATACGAACCAACAATACCATATTTTAAAACCAAATATGATCTCAACAGCTT  
GGAGGTCTAGTGGCAATCTTAATAGGTGCCCGAGGTGTTATTTCCAATTTTCTTTAGTAATTTCTCTAAAAACAATTTGATTTCACAAAAATTTTATTAGAA  
GACATTTGTAGTAATTTGTTTGAAGAGATCTGCCAAATTTTAAAGTAACTATTTCAGTCTTT**TA**CATTATTAATAAATTTAGTCTTACTTAGTCTTATGA  
TTATTGTTTTATTGTTCTTATTGTTTTATATATACTGTATTTATGTTTTGTATACCTAGGCGAAAAGTGTCTACCTCTGTTGGGAGGCAGTATTGAAT  
AAATAATA

>ORF\_Blag\_4

MSEIHSAGMSSLPTASSQNSSCPYCGKYRRLSTHIKSHPEQHRKSSIVMRNNTSSVSPVVQTASKDDNVSNSSANTNSDVGLHEIRSEVMSFREK  
FSSLLSDPCPSKFNEIYNDFTDLVTINSKLPKPNPSVRYEYLRQRNKNI FAANDRKYKDDSSNPQKKSKRDRAKRREKFYELLQYQFYNERKKC  
VNSLLNDNKRNEPCNIPIGVLKEAMEEKWGLNTSMLDHYNNSMSPHSQQNDLDQLFTIPVEVIQQSLNKMRTDSAPGPDRILVRTLKLTECSPVIA  
VILKIMLQWGMVPRMRGARTILIKYKGERCSVSSWRPISVCSVIRRLIBERALDVLRLQYLTLNNNQRFVFSQLGTSINTSLVDGLKKAKLEQRN  
VSIVMLDVAQAFDSVGLDHLEKCLDSQFLPTSLCTLIKTLTRGNFTRIHNKGQISEPIELKRGVFGQSPLSPILFNLISIDFIKELSEKQITDKYGF  
KISNLDHLSVAAFADDLVVIGQNMAARELVMMTKYLLQIGLQNLIAKSVSINIEHGKLDKELLYSGYAIRGTTKEEKIKYLVGSFNDEIIFD  
RESFITSLRNDLQILVSTPMLRPDQKLNIVNQYIWPKFIYALQMPVPHKLPLTFLEDVDKLIRSAVKEMLLLPSDVPNSMLYSAKQFRGLGLVRASW  
EAFILQNCNTVINLLADNAYVNAVRLPLELQSSCKHLDVMVFPSELRKSTIRSFREKLRRREFELWSNLPGKGRGVVLYSEVPKANKWIANKSGSLST  
SEWVSSLKMNVNVAAVRAIPGRSLDGSRCRYGCPETETLAHVQGGQCDHGLLLRNARHHQVRSLIASALRKKGWEVEEEISCATNGSTRVRDILAYS  
KTTIRIGYIIDPTIRYEKNADQSEEDQEKKIIEPTIPYFKTKYDLNSLEVIIGLLIGARGVIPNFFSNFLKQFDLPKTLLEDIVIVILKRSQCILSN  
HLRF

>Blag\_5

TAAGAAGGCCATGACTTGAGTTTGCTACTATTCTATGTGCATCGCAACTTTTTTACAATTTTACCTGCTTATCTACTATTGAATCGTTGAACTTTAT  
TACCAGAGTTTGTGATATATTGACTGTTTGCTACAAATATTAGATGATTTTATTTTGAGTATCTTGGATATAAGTATTGAAATTCATTTATAC  
TGACTGTTTACCTTAGCAACCTGCTTCCCAGGTTTGAATCAATTTCAATAATTTTAAAGTTATAAAC**ATG**ATACTATCAACTGATGAAGAATCAATTA  
CGCCTATAAATACCTCTGTGTCTACCAATACCGAAATATCCAGCGTAGCCAGTGAAGTACCATGTCTCATTTGTGGAAAAATCTTTTGGAATCAAG  
AGGTATTTTCGATCCATATAAGTAAGTCTCATCCTGATTTCATAGACTTAAGCTTGTGTAACGACAAAACCTACAAGTTCTCTATATTGGAATTTCT  
GGTGAATCATCGTCAACTTGTAAAGACGAGTATTAATGACACTCCTTCTAAAAAGCCATCCAGTGTCTGTGAATGATCCATTCCAATTCACAAACAAC  
AGTTACTTTACATGGACAACCAAATTTGATTGTGACTTAACCGACATTGATTTTGATACTTTAACGAACAATTTTTTACAATTTCTTTCTGAAGCCAT  
ATATTATTACCTGGGCCTAAACACCCAGCTAGAAAAATATATGCTCTGAGGAAGAAAAACAAAAATTTCAATTGTCAACAATCTTACAAGAATTCT  
TCTAATCCGGACAGGGCCACAAAAAGGGATAGAGCAAAACGAAAAACAAGATATCAATATGAACAAACACAGTTTGACTACTATAACCAGCGTCCGA  
AAGCGGTGAGAAGAGTTCTCACTTCAGACAAGCCATCATGCCAAATAGCATAGATAAAGTGTACGCACATTTCAATTTCTACTTTAGTTCGTCGGAA  
CAACTGTATACGACCAGATTACATCTCCCATGTTACTGAAGTCGAACGGGTTGAACTAAATGACTCCTTCCCGACTCATATTACAAAAGAAGAAATTT  
AAATTTGCAATATCAAGGATAGCTGTTGATACCGCTCCAGGTCCGGACCAGTCCCTAATGCGGGTGTAAAGATGACGCTGCTACTGGGGTCTCTCT  
CACTTCTTGCTACAAGAATGCTACGAACAGGACATGTTCTCTCCCTGCCTCTTAATTGCCCGAAGTATCCTTATCCACAAATCTGGCGATGTCAATGA  
CATTACTAATCTCGACCTATTACCATCTGTTGAGTGAGTGTGAGTATGAGAAAGAACCTGGATCGAGCTCTTAAGGAATGTTTCTTCTTAACAC  
CGCCATCAAAGAGGGTTTACTTCATCCCCTGGGACGCTCATGAACACCTCTCTTCTCAGATCCATCCTCACCTCAGCAAAGACCAAGAAATGTAATG  
CTACTCTAGTATTTCTTGACATTCGAAAGGCTTTTGATAATGTAGGTCAATTACATCTCCAAAAAACCTTAGAAAGCCTACCTATTCTAGTCTGTCT  
CTCTAATTTAATACTCAACTTACAAGAAAAACAACCACACTAGATTTGAATTAATACCATAAAAAACCAATCTTGTAACCTTAGCGAGAGGTGTTATG  
CAAGCATCACCCCTCTCACCTACGTTGTATAATCTTTCGACGGATCACATTTTGAATGAACCTTTCCGAAGACGGTGTCCGCAAGCATATGTTTATC  
AACTTGTCCCGGGGTTAAAAACCGTAACCGTCTCTCGGATTTGCAGATGATACGGTAATAGTCGCTAATAGTACAACATCGGCCCTTGAATTAACATA  
AATGGCGATAGAAGCTTTTCGAAGTATCGGTCTAGAAATTAATTTTCAAATCCGTGGCTATTAATATATCTTGTGGCAAACCTTAACCCAAATTA  
TCCTTATTAGTTGTCAGAGAATGCCACTATACCTTGTCTAGGTCCAAATGAGTTGCTGCTGTTATTAGGTGGAATTTTGCTGACCGCTGTTTGTGTTG  
ATTTCCCAAGTGACTCTCAACGATTTGAAAAATAAATTAGAACCTCTTGATTTTCATACCAATGTTTAAATCCGACCAAAAGTTCTGTATATTTAAATTC  
ATCAATTTGTCCTTCTTAAATACACTTTTCAAACAACGCCCTTAAACAATAATCCCAATAAATTTATCGAGGCGGCAGATAAAATAATTTAAAGC  
GGATTGAAAAGAAATTTTACAACCTCCAGCTGATATACCGGACTCCATGATTATACCCACCAGAAAAATTAAGGCCCTCGGACTGTTTAGAGTAAAAAT

GGGAGTCCGCTTTGCAACATATTAAATAGCCTCAGAATCCTCCATCGGGCAAAATGATGCTTACATATCATCCACACGAAATTTATATGATGAAAGCAA  
ACACTGCTTAACTGAGCTAAAACTAAAAATTTAGTGACTCACTTCTGAATAAACATGATAAATTTCTCGATTCTCGTAAAAATACGTGAAACTTTACGT  
GACCGTGAGTTTCAATACTTTGGTGATGTTTACAAGACAAGGTAGAGGGTGATTCCTTTTAAAGAGTTCCTCCATGTAAATCAGTGGATAACCAAT  
ATGAGGGTCTGTCAAGTTCGGAATGGAAGACGCTATAAAAAATGGTCGGTGGTGTGCTCCTGTTTCGAGCCGTGCCGGGTAGAAGTCGAGACACTAA  
CCGTTGTAGGCGTTGCTTAACGAGATTGAGACACTTGTCTCATGTTCTTGGCTCTGCTCCCATGGTGAGAATTTGAGAAACATACGCCACCATACA  
ATTCGTTCCATTTTGGCTGCCGCTTACGGGATGTGTGGTTTTATTGTTTCATGAGGAGGTTTCAGGGTTTGGCCACTCAGGGTAGCATTAGGCGTATTG  
ATATCATAGCCATCCGTAACAATCAGCTTACATTTCTGACCCCACTATCCGCATCGAGACTATCGACAACAACCACTGAGGTAGACATGGAAAA  
GAGGGCGATCTATGAGCCTACAATACCTTATTATAAAGAAAAATACCATCTATCAACAATCGAGGTTGTAGGTTTAATGGTGGGAGCTCGTGGCACA  
ATCCCATCCCATTTTCGCGGAAATCTGTAAAGGTTGGGTCTTTCTTCCTTTATCATTAATCAATAGCGGTCTCAGCTCTCAAGGGTTCTATTTTGC  
TCTTGAGACATCATTTATATGGCTGATAAATTTGTGCCCTTTTTTTAGAAAAATTTTAAGTACAGGTATTTCTAGTTGGGTCAGTATACATTTCAAAT  
TTTTATAAATTTTATAGTCATTTGTTTATAGGGTATTGCATTTTTTACATATTTAAATTTATAAATGTTTGGTACGCTTTGTCTTATTGGCA  
CCCTTAAATTTAAGGAAGCTATTAATAATTTAA

## >ORF\_Blag\_5

MLSTDEESITPINTSVSTNTEISSASEVPCPHCGKFFVNSRGLSIHIKSHPLDLRLKLVERQTTSSYTINWSSGESSSTCKTRIINDTPSKSHPEVS  
 VNDPLSNYKQQLLTWTTKFDCLDLTDIDFTDLTNNFLQFLSEAIYYLPKPKPHARKVYALRKKNKNFNQCCSQYKNSNPNDRATKDRAKRKQKYQEYQ  
 TQFDYYNQRRKAVRRVLTSDKPSCQIAVDKVYAHFNSYFSRPNNCIRDPYISHVEYERVLKNDSFPHTITKEEKFAISIAVDTAPGDPDHLVLMR  
 LKDDAATGVLSELLATRLMRTGHVPPCLLIARSILIHKSGDVNDITNYRPIITICSVVRRVIERTLDRRLKEYVVSFNHRQRGFTSSPGTLMNTSLLRSI  
 LTSATKKCNATLVFLDIRKAFADNVGHLLHQKTLESLPISSLNLINLNLQENNHTRFENHNHKTNLVPLARGVMQGSPLSPTLYNLSTDHILNELS  
 EDGAKAYGYQLVPGKLVFLGFDADTTIVANSTSTALELTKMAIERFSRIGLEINFKSVAINISCGKLNPNSYLLVAENATIPCLGPNFNEFVRYL  
 GVNFAADACLFDSQPTLNDLKNKLLDISPPLNDPQKFCILNSSCPSLYTFQTTPLNKIPNFKIEAADKIKSGKLELQLPADIPDSMIYTHRK  
 FKGLGLFRVKWESALQHINSLRILHRANDAYISSTRNLYDESKHCLTELKLFSDSLLNKHDNFDLSRKIRETLRDREFNTWCSLQSKGRGVILFKE  
 FPPCNQWITNHEGLSSSEWKDAIKMVGGVAPVRAVPGSRDTRCRRCLNEIETLAHVLGSCPHGENLRNIRHHTIRSILAAALRDVGFIVHEEVQG  
 LATQGSIRRIDIIAIRNNTAYILDTIRTETHAEQPREVDMEKRAIYEPTIPYKEYKHYLSTIEVVGLMVGARGTIPSHFAEICRKLGLSSFIKSI  
 AVSALKSGILLRLRHHLYG

## >Blag\_6

ATTACGTTTCAACAAGAGCTGTGCTAACTTTCAAAAAATGTGAAATTCATCGATAAGAATTTAATTCAAGTGTGTGAAAATACCGTTGGTAATTCGATC  
 AGTGAAGGTGAGTGCTGTGTAAAAGATGACGTCCGCAATGCGACCCCGCTGTTACTTAAACATCATTTACTGTTGTGATATCTCTCAAACTACTACAA  
 TTTTATATTGGATTTTCTCCGTGAAGACTGACTTCTCTTTAGACATTTGGTTACTCT**ATG**ATGATCAGATTTCTGGAGGACCTTCGTTACCATTCTAATG  
 ACGGTAAGACTATTGCTTTAGTCTCTTTCGAAGATATGTGGAAAAAGTTTTACTAGACATGGAATTAATATCCATATTGCTAGAAAGCCATAGACATTC  
 CCAAGATTTGATAGACATTGATAAGCCTACTGATTCAATTTTATCAGAGACTGTAACTTCTCACCTTCTGACCTTATTGAATGCCAGGATAATATC  
 CATCTTAATACTAATTATCTCTTAACTAGAAAGTCAATTCGTGCAGCTCAATAATGATGAGAAAGATAAAAGTGAATAACATATTATTAATAATACAT  
 CTTCCAGATATCTGGTGTCTCTTCTGTAGTAAAGTATCAAAATTTAAATGGCCATATAGCAGATCACATCCCCATTTTATAGAAAAATATTT  
 CGAACGTTATGCCAATGCCTTCTCCTGTCTGCGAAAAACAGAAATTAATAATAATAGCCGTCACTTAAATAAATGAAAATAAGTTAGAGCCTTGG  
 GAAAAACATTCTCTGAAATTTCTTAATAGCGAAAAAGATGAAGTGAACTAGACCAGAAGTTAGATGAATTTACCTTATTTCTATGCAATGCCACCT  
 CTCGTGCAAAAGGTCCGGTACATCTCTGCTACAAAGTATTATAAAGCTAGAACTCATGGAGACCAAATCATGAGAAGTCTAAATTTTAAACATCCAA  
 TAATCTCTCAAAAGACATGATAGGCGTTTGAAGGAAAAAGAGACAAATCAATACCGATATGATTTATGCAATCTATTATTTACCGGAGAAAAAGAA  
 GCAGTGCAAAAATCATGATCATTTTCAGATTACAAACGATGTCCATTCTGCAACAGATGTTTATGACTACTTCAAAGAAACAGTGGGAAACAGAA  
 ATAATAATGTCTTGCATGATTATTCATCTCATCTCCTTTGTGCAATTCATAGATGAGGAAACAAATAGACTATGATTGTCAGTATTGTACTGTAAAC  
 AGAAAAAGACATTGATCAAGCAATGAAAGGAATTAATCTTGATACTGCCCTTGGCCCCGATAGGGTCTTTTTCAAGGTCGTCAAAGAAGCTTAAATGC  
 ATGAAGATCATCAGCATAATTTGCTAACATCATGTTAAGCTGGAAGTATGTGCCAAAGCTTTTTCAATCCGGTGCACATCTCTTGATCTTTAAATCCG  
 GTGATCCAAATTCATTGAAAACCTGGAGACCAATAACAAATTTTCTCAATTTCTTAAAGAAATATAGAAAGAGCATTAGAGAGAAAAACAGACCATT  
 TGTGGAATTATCAACTTGTGAGCGCGGTTTTATATCAACACCAGGGACTTTTATAAATTCAGAGCTTAATAAATAGTTGTCTTCAGAAATCTAAGAAA  
 GAAAAGGGTGACTGTTGTATTACTTTTCTTGATGTATCTAAAGCGTTTGACTCTATTGGTCAACAAGCATATTGAAATGAGTTTGAAGTCTACATCAA  
 TTCCAAGCGAATTAATAACCTAGTTCTTCTCTAGTAAAAAATAACTCAATTTGCGGATTTAGTTAGATGCAACACCGGCACATAGCCAAATAATAT  
 AGAAAAAGGAGTAGCCCAAGGTTCCCATCTCTCTCTCTCTCACTTGTCCTGCTGATTTATTTATTCGCAATTTGAATGATTTTTCAGATATGCA  
 TCTCAATATGGTTTATCGCCTTACCGAAGAGGTAGACAACCTAATTGTCTCTTGGTTTCGAGATGATATTGGCTTTAATATCTAAATGAAACATCTG  
 CTGTTATTATGATTGAAAGAGTAAACCAATGCCTAACAGAAATTTGGGCTCAATTTAAACGCTAGTAAATCTAAAATTTAATAATCAAGAAAGGGAA  
 ATTAATGAATACCCAGTTTACAACATTGAATGACATTAGATCAATTTCTATACAAGCGGAGGAGACCATGATATATTGGGAGTTACATATAATGAT  
 GAAATTTATAGATAAATGTTCTATCATATAACTTAACCTAACTCGTAGCATATAAAAACCTTACACCTCTCTCGCTTCTGAAACCCAGACAAAAATCA  
 ACATCTTAAATCAATATATTATGGCCAACTCTAATTTTCTCACTTCAATGTGCTCCTCTCTGCAAACTCAACTGGGTTTTACAGAATATTGTAA  
 AATTGTAAAAAATGCAGTTAAGGAAATTTAGGAGCTTCTTGTGACACTCCTGATTTCGATGTTATATACCTCTCGAAAAATATCGAGGGTTAGGTGTG  
 ATGAAGCGACATGGGAAGCTTTCTCCAAATATAACATCTGTAATAAACTGCAAGTGTCTCCGATCCTGTTATTGGATTACAAGAAATTTTA  
 ATGATGAGATACAGGAAAGTTTAGATCATCTTAAACATAAGCAGAGAAGAACATCCCAATGTCCGCTCTCTCTCGGAAAAAACTCAGAGAAAGGAATA  
 CGAAAACCTGGAAGATTTGCTCTACGTGGCCGAGGAGTAGCCCATTTTCAGATGGACTCATTTCTAACACCTGGATTTCTTCAAGAAGGTTTGT  
 TCCTCTCTCAGTGGACAAATGCAATTAATAATGGATTGTAATGTCTTCTGTCGTAGTCTCCAGGCAGAGCGAAGAACCCGTTGCCGTCATT  
 GCAACGAGTCAGAAACCTTCCCATATTTCTGGTTTTTGCAAAAGGGAGAATTACTGCGTAAACAACAGGCATCATAAGGTGAGGAGTGCCATTGC  
 TAACTCTTCTTAGAGACAGGCCATTTTGAATATTGGAAGAAATACATTGTCATCTCACTGACGGTCTACGAAAGCGTGTGCTGACATCTCGCAAT  
 GATAGAAAACGTGATTTAGGATATATCTGGATCCACGGTCAGATTGAGAAGACCTATCTCAAGCTCATCTAGTTAACGAGAGAAAAAGAAAC  
 ACTACCAACCGTGTCTGCAATACTTTCTTGAGAAATATAAAATCAACACTGGGAAGTAATAGTTTTATTATTGGTCCAGTGTGTAACAAACAA  
 ATTTTGCGTGAATATATTACTACATTTCCGCATAAAGAAAAAAGTCTACAGGAAATTTCTACTTGCCATACTGAGAGATTCAGTACACATCGTACA  
 TTTTTCATCTGTATGGTGCATGAATATCTATCA**TGA**ATAATAATAATTTCCAGTTATAAGAAAGCTGCCTTTTTACATTTTAATATAACAAAAATT  
 CATAACAGTATTTATTTTCTTTCTTTATTTATTTTTCAGCAAGAAAAATTAATATCCCTAATTAAGTACCTATTATAAAATTTATGTT  
 ATTTATTATTGATGGCGAGGCTGTACCTTTTGGTAACCTTAAATAAGGCGAGTATCTCAATTTTGGATTTTCTCTCTCT

## >ORF\_Blag\_6

MISDSGGPSPSNDGKTIALVSCIKGKSFTRHGINIHIA RSHRHSQDLIDIDKPTDSILSETVNFSPSDPIECQDNIHLNTNSSNNEKVIRAVNND  
EKDKSDNNIIKNTSSDIWCPYCSKVFKNLNGHIARSHPHIYRK NITERYANASPC LQKTEINNNSGQLKINENKLEPWEKTFSEILNSEKDEVKLDQ  
KLDEFTLFLCNATSLCKGPVHPATKYKARTTW RPNHEKSNFKTSNNPQRHRR LKEKRQNYRYDLMQYYYYYRRK KAVQKIMHLSDYKRCPF SAT  
DVYDYFKETVGTENNNVLHDYSSISPLCNSIDEETIDYDCQYCTVTEKDIDQAMKGINLDTAPGPDRVLFKVVKELKCMKIISIIANIMLSWNYVPN  
SFQSGRTILIFKSGDPNSLKNWRPITIFSI LRRIIERALERKIRPFVELSTCQRGFISTPGTFINSSLINSLQKSKKEKGDC CITFLDVSKAFDSI  
GHKHIEMSLNSTSIPSQKSLVLSLVKNNSVGIELDATTRTKPINIEKGVAQGSPLSPLLFNLSIDFIYRNLNDFQNASQYGYRLTEEVDNLIALGF  
ADDIALISNNETS AVIMIERVNQCLTEIGLNLNASKSKIINIKKGKLMNTTVTTLN DIKINSIQAEETMIYLGVTYND EIIIDKCSIITNLNRSISK  
LITSSLLKPDQKLNILNQYIWPTLIYPLQCAPLCKLQLGFLQDIDKIVKNAVKEIVGLPCDTPDSMLYTSRKYRGLGVMKATWEAFLQHINICNKLQ  
VSSDPVIGFTRNFNNEIQESLDHLNISREEHPNVRSLRKKLREKEYENWKSLPHRGRGV AHFSEWTHSNTWISSKKGLSSSQWTNAIKMDCNVIPVR  
SLPGRSEETRCRHCNESETLPHILGFCKKGELLRNNRHHKVRSAIAKLLLETGHFEIFEEIHCISTDGGSTKRADIIAIDRKRD LGYILDPTVRFEKD  
LSQAHLVNEEKKKHYPCKKYLSEKYKINTWEVIGLLFGSRGTITKFCVNILLHFGIKKKKSTGNSTCHTERFSTHRTFSSVWSHEYLY

## Supplementary Figure 2

### Structural of the non-site-specific R2 retrotransposons of *Blattella germanica*.

The open reading frames are highlighted in yellow, and the nucleotide sequences without background highlighting correspond to 5'- and 3'- untranslated regions.
