# Supplementary material for: R2 and Non-Site-Specific R2-Like Retrotransposons of the German Cockroach, Blattella germanica
Source: MDPI journal article supplement (doi:10.3390/genes11101202), 2020-10-15
Supplement: s1 [file s1]

# Blag 1

5'

```
Blag 1_01 ttaaatggcaataattgactcaactgcagatgctaaactagtacaattcaatcaatcaat
Blag 1_02 -----ataaatttaaaattaaaa
Blag 1_03 -----tgtctttatttttct
Blag 1_04 -----gagcttatcctattcatttattgttt
Blag 1_05 -----accccatatgtgggattgccaaatgtca
Blag 1_06 -----gagaaacaaatcagatttctgtactactt
```

\* . \*

```
Blag 1_01 gttctttatttgcctttgagtataaatatacaattggcatcgctccatagaatta-----
Blag 1_02 aacttgaatctgtatttagattttcaagattaaagatctagtttcattggaatca-----
Blag 1_03 gttatgaagatctatctaagtgtgaagtttcaaggctacttatatagtggcat-----
Blag 1_04 gtttattatttgttatttattatcacttgagtactaaccttggtttacaga-----agatg
Blag 1_05 caga-ataataaatattagattttccttcattaaatgaaataaaatttaaagaaaaatt-
Blag 1_06 actc-tcagcagtttctgaaatatcctgtgaatatattaggaatatcattgatatactta
```

\* . \* \* \*

```
Blag 1_01 -----caatatattttataaatctatttcacattaaaaaaat
Blag 1_02 -----atttcaaaactgggtaactaatatttcatgaaaacact
Blag 1_03 -----gttgtcaaatagtttctcttgaagtcaccaac
Blag 1_04 ttgaaagtgggtggccatctgcattgaatgcattcttgacatctctttagtt--ttaaaatt
Blag 1_05 ---aaatcaatttaaaccattggtaggaccatacaaatggctgcgaaaaatcatgaccgag
Blag 1_06 ttgaattttattctgaaataaattagtgctatattggacattgaaattgtttatttggtaac
```

. . . . .

```
Blag 1_01 tcgtccatgttg----tgaaaaggatttttcatcaaccaaccagagatcttggttttga
Blag 1_02 atggacataaatatggtttgatgtggaattaaatttcaaattttgaaacttatttgaaatgg
Blag 1_03 atttttatatttactaactagggtttccacctttacaattctcaattctcgaacataa
Blag 1_04 ttagtagccgta----tgaactaaggactttgaaacacttacttctgtgcaacacgtc
Blag 1_05 ta---tgttttc---agtgcaaaattacatctacaatttcttaatttctcatccttg
Blag 1_06 taagtcgttttc---agtgcaaaattacatctacaatttcttaatttctcatccttg
```

. . \* . . . .

```
Blag 1_01 aatagggttg-ccagggtatttggaaatttcaatacgggactgggcataacaaggcattttc
Blag 1_02 atagaattgtcttacctaacgaag-----gcataatacac---aggtcgaattttta
Blag 1_03 aaaaaagacattttaagaattgaatgatttctgtagaactgct---aaattcaaattgta
Blag 1_04 taagaggcttatttggagagcgagtgaaatgatgcattgaatttc-----aacgagtttt
Blag 1_05 catatggctatctttcgaggcaaaattacaaaggaggaatt-----gtgattttg
Blag 1_06 catatggctatctttcaaggcaaaattacaaaggaggaatt-----gtgattttg
```

. . . . . \* \* \*

```
Blag 1_01 tcctttgatagtgtc-----atggaatgtctgacaacaactatg
Blag 1_02 ttacttgtcccatc-----tgtatagtgatatctgactgtgagttct
Blag 1_03 tcctgtgtaaagtgtga-----aggccgtgtatagtgatatctgactgtgagttct
Blag 1_04 tcctcaatttaggaccctt-----ctcttggcttcggacatttagcgtttagggat
Blag 1_05 atggaagtgaaaatcactgaagagaaatttatgaaatatttatattttattagcaagtggg
Blag 1_06 atggaagtgaaaatcactgaagagaaatttatgaaatatttatattttattagcaagtggg
```

. . \* . \* . \*

```
Blag 1_01 --atcaaaaattaagtgtgacttt--atcagagttaatgaacatctttaccttccatcggt
Blag 1_02 aaagttaaagtgtattgtgaatgcaaatataaatctgtttgacaatgtcagaaaaactgtttg
Blag 1_03 aaagttaaagtgtattgtgaatgcaaatataaatctgtttgacaatgtcagaaaaactgtttg
Blag 1_04 --cccggtgttcttaatt--ttt--taataagacgctgacagctctttaca--tttacg
Blag 1_05 --accggtactacacttttatc--ttgtatgcagttggacatccggtttt-----
Blag 1_06 --accggtactacacttttatc--ttgtatgcagttggacatccggtttt-----
```

. . \* \* \* . . \* \* \* .

```
Blag 1_01 ccatttgtttgaattggaaaaaaaatactttcaacgtgtatggtatagttaagaaaaata
Blag 1_02 ttaattattggcttcagtgaaatatcttttaaatagtggtatggtatagttaagaaaaata
Blag 1_03 ttaattattggcttcagtgaaatatcttttaaatagtggtatggtatagttaagaaaaata
Blag 1_04 gcatttacttggtaaccaaacgaagaccttatcaaaaactgaaattt-----aaga
Blag 1_05 -catttacttggtaaccaaacgaagaccttatcaaaaactgaaattt-----aaga
Blag 1_06 -catttacttggtaaccaaacgaagaccttatcaaaaactgaaattt-----aaga
```

. \* \* \* . \* . \* . \* . \* \* \* \*

```
Blag 1_01 atgtgct-tattcagatataaactatgcttaactaagggtaaatgttttatcaaatattgctg
Blag 1_02 atgtgct-tattcagatataaactatgcttaactaagggtaaatgttttatcaaatattgctg
Blag 1_03 atgtgcttattcagatataaactatgcttaactaagggtaaatgttttatcaaatattgctg
Blag 1_04 ttttcgctattcatattgaatttctttt-----gtcctctaccgacat-----
Blag 1_05 ttttcgctattcatattgaatttctttt-----gtcctctaccgacat-----
Blag 1_06 ttttcgctattcatattgaatttctttt-----gtcctctaccgacat-----
```

. \* \* \* \* \* \* \* \* \* \* . \* \* \* \* \* \* \* \*

```
Blag 1_01 tgaagtgaagaaattgccataattgactgattttgaactgaattaacacatttttaggccta
Blag 1_02 tgaagtgaagaaattgccataattgactgattttgaactgaattaacacatttttaggccta
Blag 1_03 tgaagtgaagaaattgccataattgactgattttgaactgaattaacacatttttaggccta
```

Blag 1\_04 -----gctactgttggtaaatattaagtattgtatggccta  
 Blag 1\_05 -----gctactgttggtaaatattaagtattgtacggccta  
 Blag 1\_06 -----gctactgttggtaaatattagatattgtacggccta  
 . \*\* . \* \*\*\* . . \*\*\*\* . \* \* \*\*\*\*\*

Blag 1\_01 tgctatatctgaccaagtttcattaaacgtatgaataccgaaacaaacgagcaatccga  
 Blag 1\_02 tgctatatctgaccaagtttcattaaacgtatgaataccgaaacaaacgagcaatccga  
 Blag 1\_03 tgctatatctgaccaagtttcattaaacgtatgaataccgaaacaaacgagcaatccga  
 Blag 1\_04 tgctatatctgaccaagtttcattaaacgtatgaataccgaaacaaacgagcaatccga  
 Blag 1\_05 tgctatatctgaccaagtttcattaaacgtatgaataccgaaacaaacgagcaatccga  
 Blag 1\_06 tgctatatctgaccaagtttcattaaacgtatgaataccgaaacaaacgagcaatccga  
 \*\*\*\*\*

Blag 1\_01 ccatactactatcaacgtcgattttctcacacgctgaagtaggcctatc  
 Blag 1\_02 ccatactactatcaacgtcgattttctcacacgctgaagtaggcctatc  
 Blag 1\_03 ccatactactatcaacgtcgattttctcacacgctgaagtaggcctatc  
 Blag 1\_04 ccatactactatcaacgtcgattttctcacacgctgaagtaggcctatc  
 Blag 1\_05 ccatactactatcaacgtcgattttctcacacgctgaagtaggcctatc  
 Blag 1\_06 ccatactactatcaacgtcgattttctcacacgctgaagtaggcctatc  
 \*\*\*\*\*

### 3'

Blag 1\_01 tttgtgtttccgtcccaatca-tttaacaactttcagtttgccattatattatgctttgt  
 Blag 1\_02 tttgtgtttccgtcccaatca-tttaacaactttcagtttgccattatattatgctttgt  
 Blag 1\_03 tttgtgtttccgtcccaatcattttaacaactttcagtttgccattatattatgctttgt  
 Blag 1\_04 tttgtgtttccgtcccaatca-tttaacaactttcagtttgccattatattatgctttgt  
 Blag 1\_05 tttgtgtttccgtcccaatcattttaacaactttcagtttgccattatattatgctttgt  
 Blag 1\_06 tttgtgtttccgtcccaatcattttaacaactttcagtttgccattatattatgctttgt  
 \*\*\*\*\* . \*\*\*\*\*

Blag 1\_01 ccactgtggcagtcaccttagttgggaaagccgaaagggttcacttttctaaataaaaaaaa  
 Blag 1\_02 ccactgtggcagtcaccttagttgggaaagccgaaagggttcacttttctaaataaaatgaa  
 Blag 1\_03 ccactgtggcagtcaccttagttgggaaagccgaaagggttcacttttctaaataaaataaaa  
 Blag 1\_04 ccactgtggcagtcaccttagttgggaaagccgaaagggttcacttttctaaataaaataaat  
 Blag 1\_05 ccactgtggcagtcaccttagttgggaaagccgaaaggattcacttttctaaataaaatagt  
 Blag 1\_06 ccactgtggcagtcaccttagttgggaaagccgaaagggttcacttttctaaataaaatatt  
 \*\*\*\*\* . \*\*\*\*\*

Blag 1\_01 aataaactaggc-----agaaatgtttgcgctatgtgaagaaatgaagtga  
 Blag 1\_02 aataaatatgaat-----acataaatttctcctcccattcttcttaataaatta  
 Blag 1\_03 atacagggttaa-----tttattattattatttaacaaaatcacagaaattaa  
 Blag 1\_04 a-----tcgtatctttcactgcccattggtgaatttaata  
 Blag 1\_05 caataatatgga-----ttcttgaagatttt-----atga  
 Blag 1\_06 tggaaactgaaacagtagggaatttgtcttgaaattgctacacacttctctgcatgactc  
 \* .

Blag 1\_01 aatgcatatgcagaaatacgttgttaaa---ataagggaaaagggcgctcccgatgttg  
 Blag 1\_02 aat-----ctaaccctcaaaagaaacaaacctccaccggaacct  
 Blag 1\_03 ggaaacatagtgtcctaacctcttaaccgccattacggaaaaagtgttggcgaacccc  
 Blag 1\_04 cat-----tggtactttttattttactttt  
 Blag 1\_05 agcttatatttaactctcaagttctgaa---ataatttaggaatggtgcctctgacacc  
 Blag 1\_06 tgttttta-----cataagtgtcatacatgaacactcctttgttcaagcgt  
 . . . . .

## Blag 2

### 5'

Blag 2\_01 atccaatatctggttcatagaattaattaaaacaaaagatatagaacaaataaaccaaca  
 Blag 2\_02 aatccatatcttttgtgtaaggaaaaatggagggcaaaaatttaagtgttacgg-----g  
 Blag 2\_03 aatgccagct-----ggaaaatgaattcattgagtatatagggttcaaaccaact  
 \* . . \* \*\* . . \*\* . . . . \* \*\* . . . .

Blag 2\_01 tattacaaggaaatacggtaataagaatgttagaatgaaaacatttcaattagtttgatac  
 Blag 2\_02 tgtgacaaaattttctacaggcattgcgcatctcatgcagttaatttagtaactctgttag  
 Blag 2\_03 atttatcaag-----ggacatggacataaccttaaaataatgtcaagggttac  
 \* \* . \* . . . . . \*\* . \* . \* . \* \*\*

Blag 2\_01 ttacaaaattgtacttgagataaatattttcataatccactgttggtagtgtggtactcg  
 Blag 2\_02 ttactacattctgcaataatgggacattttt-----ttctggtagtgtggtactcg  
 Blag 2\_03 ttatcgtaaac-aaagaattaactcactttt-----gcttcataatcttcatttc  
 \*\*\* . . \* . . . . \*\*\*\* . \* . \*\* . \* . \* .

Blag 2\_01 aggtaagcggacgtgttttcggatcgctcccgagttgaggttatggtgccgggtggagtca  
 Blag 2\_02 aggtaagcggacgtgttttcggatcgctcccgagttgaggttatggtgccgggtggagtca  
 Blag 2\_03 ctgtttat-----ttccattgtactccacactgacacatcgcatataagtaaattta  
           \*\* ..           \*\*.\*. ..\*\*\*\*\*. ..\*\*\* .. .\*       ...\*\*\*.\* \*\*  
  
 Blag 2\_01 acaatgtcaacatgagcctttcaaattcaaattgtatccgttggttaagtgaatgttgcta  
 Blag 2\_02 acaatgtcaacatgagcctttcaaattcaaattgtatccgttggttaagtgaatgttgcta  
 Blag 2\_03 -----tattttaataatgtaaaacaacattttatttcatataaacatagccataatc  
           \* . \* \*.. \* .\*\*\* . \* \*\*\* \*\*.. \*.\* \*  
  
 Blag 2\_01 atttaaccaacggtttttaaatatgtacaatg---tgaaaattacgttcataagagctgt  
 Blag 2\_02 atttaaccaacggtttttaaatatgtacaatg---tgaaaattacgttcataagagctgt  
 Blag 2\_03 aataaa--aacaattacgaaaacagaaaatgacattgatcagggtacccaacagagcaaa  
           \* \* \*\*   \*\*\*.\* \* ..\* \*.. \* \*\*\*\*       \*\*\* \*   ....\*\*   \*\*\*\*\* .  
  
 Blag 2\_01 gctaagcttctaaaaatgtgaaattcatcgataagaatttaattcagtgctgtgaaaaata  
 Blag 2\_02 gctaagcttctaaaaatgtgaaattcatcgataagaatttaattcagtgctgtgaaaaata  
 Blag 2\_03 tttagcctacatctaataatgcgaaatcgcatatcaattacattggtagaactgcaatagta  
           . . . . \*   \*\*\*\*\*.\*\*\*\*\*. . \*\* \* .       . \*\* .\*\*\*.\* \* \*\*  
  
 Blag 2\_01 ccggttggttaatt--c gatcagtgatggtgagtgctgtgtgtaaaagatgacgtcgaatgcga  
 Blag 2\_02 ccggttggttaatt--c gatcagtgatggtgagtgctgtgtgtaaaagatgacgtcgaatgcga  
 Blag 2\_03 acatgtgtcatctatgatcagtgatggtgagtgctgtgtgtaaaagatgacgtcgaatgcga  
           \* . \*   \*\* \*\* .   \*\*\*\*\*  
  
 Blag 2\_01 ccccgctgttactttaaacatcattatacttgttgatatcttcaaactactacaatttatg  
 Blag 2\_02 ccccgctgttactttaaacatcattatacttgttgatatcttcaaactactacaatttatg  
 Blag 2\_03 ccccgctgttactttaaacatcattatacttgttgatatcttcaaactactacaatttatg  
           \*\*\*\*\*

3'

Blag 2\_01 tataatgcatacgtttatactttgtccatagtggaactcgcaactgcgagaagttgttga  
 Blag 2\_02 tataatgcatacgtttatactttgtccatagtggaactcgcaactgcgagaagttgttga  
 Blag 2\_03 tataatgcatacgtttatactttgtccatagtggaactcgcaactgcgagaagttgttga  
           \*\*\*\*\*  
  
 Blag 2\_01 tttcgttcaataaaatatataataatatatttatccataattcaattgaatttcaaactc  
 Blag 2\_02 tttcgttcaataaaatatatagcttttttaggacaagggttactttttcgaaaattaagattt  
 Blag 2\_03 tttcgttcaataaaatatatacaata--gtaaattcatatcaagaggaagaatttaata  
           \*\*\*\*\*       \* .       .\* .       .\*. \* . \*  
  
 Blag 2\_01 gtaagatctaatacaagtctagaattatgaataatgatccacttaagaatcgagcaata  
 Blag 2\_02 gtttttatccaagggcaca-----gaga  
 Blag 2\_03 ataatgtttataagatacgagaaaattgtatttatttatcattctagga-----agtg  
           .\*       \* . \* . \*       . . .  
  
 Blag 2\_01 ataaatacatcgcaaaagaactgaataagctaagggataattattattagactgaa-ttt  
 Blag 2\_02 attattaaagcatgtttcaaaaattttgcgagcatgatattttaaatattttgttattat  
 Blag 2\_03 aaaattacactagcctataaccatttccgcataaacataattaaacatacaaaga-aat  
           \* \* \*\* \* ..       \*\* . \*       . \*\*\* \*\* \* .       \* \*

## Blag 3

5'

Blag 3\_01 gtcataatccaggacttattgacaatacattctccattttgtttttagtattttctcgg  
 Blag 3\_02 cttcataacatggaagtaatatatgt-tagaataggcattattaaatggagtagtttcga  
 Blag 3\_03 agtgacgtgagaagcaaccttcagatagacacacaataacataaaagacgttg-----  
 Blag 3\_04 aataatategaaccactcttctcgggtgttttacttgttttgtcagggtactttatttgaga  
           \* \*.. .       \* . \*       . . . \* . . \*  
  
 Blag 3\_01 tattactggaaacagaattttaaactgaaagttgtatctttaaaaacttaagtgcattcatt  
 Blag 3\_02 taaggcgctactatagaattttaaatt-----tcttatctaagtaaatattttatg  
 Blag 3\_03 -----tatacaatactccaatggcggaactgtcactgcttgtaactatcactcc  
 Blag 3\_04 a-----cattctatcattttatgtgtaagttcgtttcattatgtagtaagctccatcc  
           . . . \* . \* .       \* . .       . \* . . .  
  
 Blag 3\_01 taagggttagacgtattt----gatttgagaaggctgtggaattataagtttttgatattg  
 Blag 3\_02 tcgaaagaatatttgaa----tatttgagaaggctgtggaattataagtttttgatattg

Blag 3\_03 agagggtgtttccaaaca----catttgagaaggctgtggaattataagtttttgatattg  
 Blag 3\_04 ggatatatatatgacaaattggatttgagaaggctgtggaattataagtttttgatattg  
 . . \*\*\*\*\*

Blag 3\_01 ctatactgggacctattaatctttaattatcaatatctactacatcttttgaaaattatg  
 Blag 3\_02 ttattctgggacctattaatctttaattatcaatatctactacatcttttgaaaattatg  
 Blag 3\_03 ctatactgggacctattaatctttaattatcaatatctactacatcttttgaaaattatg  
 Blag 3\_04 ctatactgggacctattaatctttaattatcaatatctactacatcttttgaaaattatg  
 . \*\*\* \*\*\*\*\*

3'

Blag 3\_01 ttttaaattattttcaacatttttaaattcattttattatcaaaaattcatcttgttttct  
 Blag 3\_02 ttttaaattattttcaacatttttaaattcattttattatcaaaaattcatcttgttttct  
 Blag 3\_03 ttttaaattattttcaacatttttaaattcattttattatcaaaaattcatcttgttttct  
 Blag 3\_04 ttttaaattattttcaacatttttaaattcattttattatcaaaaattcatcttgttttct  
 \*\*\* \*\*\*\*\*

Blag 3\_01 ggatccaagagggtctcccgataattagggcagatgttctttttgaacttagtagtagtag  
 Blag 3\_02 ggatccaagagggtctcccgataattcgggcagatgttctttttgaacttagtagtagtagtag  
 Blag 3\_03 ggatccaagagggtctcccgataattcgggcagatgttctttttgaacttagtagtagtagtag  
 Blag 3\_04 ggatccaagagggtctcccgataattcgggcagatgttctttttgaacttagtagtagtagtag  
 \*\*\*\*\* . \*\*\*\*\* .

Blag 3\_01 ct-----ttaaatagtccaagaaaatttg-----  
 Blag 3\_02 tgggcactgtagggttagtaggggtgatacgtcagggtatgaggacgtggagagcagctcg  
 Blag 3\_03 ta-----gaatatcgctggacatctgcttttgaagcacttttgtaattat  
 Blag 3\_04 ac-----aaataacatttatagtgggtgatgttgataccgctctgcttgccttta  
 . \* . \* \*

Blag 3\_01 ---caggcagggaacaag--attagcttccaattcgctattacacaaaattt-----  
 Blag 3\_02 cagaaccatgtcaacgagtggtggactactaaagcatt-----  
 Blag 3\_03 tgttaaattatttgtaaattttggtaagcatt-----  
 Blag 3\_04 ttacaaattaaaagcaagcagacggtatcaacatcatcactataactcttgctttggt  
 \* . . . . \* \* . . .

Blag 3\_01 -----ttgggctgtaagaatgggtgactgtcgcccaaaaaaaaaaagg-----  
 Blag 3\_02 -----cgggcaatcatttagacattctaataataattatcaagaaaattttt  
 Blag 3\_03 -----atagtaaagaattaaaaagtaaagtaaaatgaagattaca  
 Blag 3\_04 atcaaaatgaagataaaaataacatttaattattgctaagaaaaatgacaaggatttcct  
 . \* . . \* . \* \* . \* \*

## Blag 4

5'

Blag 4\_01 tc-aattatgctgaatgtttactacttaaatagggcataa-cataactgctac-tccagt  
 Blag 4\_02 ta-tagcaattcgtataataatg-----taggccatgatcgtagcgataat-ttcatt  
 Blag 4\_03 aagtcataaaatgagcaatcaat-----taaaatagtaacttacaaaacatatttaata  
 Blag 4\_04 tt-taaagggtttatttatatatt-----ta-----tttattaccatattcatt  
 . . . . \* \*\* . \*\* . \* . \*

Blag 4\_01 tattggatagcgttgagtaatattttcataatcatactcttttaagataca---cgagc  
 Blag 4\_02 cagagcatat-----tttaagttaagaatgacttatagg  
 Blag 4\_03 tat---tttt-----tttacaaaattctgta---tattt  
 Blag 4\_04 tatttattat-----ttcatccaaaaaaca---aaaaa  
 . \* \* \* . \* \*

Blag 4\_01 atactggaggaggcagtggaagttgaattggcttctgttgatgggctctgtacattttcta  
 Blag 4\_02 aggatacaggaggcagtggaagttgaattggcttctgttgatgggctctgtacattttcta  
 Blag 4\_03 ttcagtcaggaggcagtggaagttgaattggcttctgttgatgggctctgtacattttcta  
 Blag 4\_04 aaacaacaggaggcagtggaagttgaattggcttctgttgatgggctctgtacattttcta  
 \*\*\*\*\*

Blag 4\_01 tca-tttttcatgttttcatgcgacttgctgcttcggaagtgttttcaattcaagtttac  
 Blag 4\_02 tca-tttttcatgttttcatgcgacttgctgcttcggaagtgttttcaattcaagtttac  
 Blag 4\_03 tca-tttttcatgttttcatgcgacttgctgcttcggaagtgttttcaattcaagtttac  
 Blag 4\_04 tcatttttcatgttttcatgcgacttgctgcttcggaagtgttttcaattcaagtttac  
 \*\*\* \*\*\*\*\*

3'

Blag 4\_01 tattgttttatatactgtatttatgttttgatactgaggcaaaagtgtctacctctg  
 Blag 4\_02 tattgttttatatactgtatttatgttttgatactgaggcaaaagtgtctacctctg

**Blag 4\_03** tattgttttatatactgtatttatgttttgatactgaggcaaaagtgtctacctctg  
**Blag 4\_04** tattgttttatatactgtatttatgttttgatactgaggcaaaagtgtctacctctg  
 \*\*\*\*\*  
  
**Blag 4\_01** ttgggaggcagattgaataaataaata-----ttttta  
**Blag 4\_02** ttgggaggcagattgaataaataaataat-----tattcaataaatattttatatt  
**Blag 4\_03** ttgggaggcagattgaataaataaataaa-----taatgttgatactggatgattct  
**Blag 4\_04** ttgggaggcagattgaataaataaataaataaaggtcgatcaagacaatactgtagaca  
 \*\*\*\*\* \* \*  
  
**Blag 4\_01** aatatgcctttatagcttacacaataattttaa-----  
**Blag 4\_02** agtctaatacgtcatctcctaattatttttaa-tagctattt----atcacatttcaaag  
**Blag 4\_03** aattttttattattttttttattttatttatt-tttttattt----atttttttttttc  
**Blag 4\_04** aaaaacggaacagcatattgcgttgatttgttatgatcatgttgcagttaaaattatggg  
 \*. . \* . \* \*\*\*.  
  
**Blag 4\_01** -----tcctctaccagtcattggagggtgcatatacagaattaactgcattcctagattctc  
**Blag 4\_02** ttgataccaatcttatgtactatttgtgtttctat---agcaatt-----cgtataa  
**Blag 4\_03** catgtactatatgttagtggtcatagtgcagtg---aaaaa-----aa  
**Blag 4\_04** tgggtatcgattacgcgcgataaaggtaaaaattc---atcaactacgcgcggtggtcag  
 .. . . \*. \* \*\*. \* . \* \*\*

## Blag 5

5'

**Blag 5\_01** aaaataagacctatgttttatatgaattttttaatcacattgataccagcaaccagatc  
**Blag 5\_02** aacgaaatttatagtttaag-----acaaaaaatccctcttctaaaggcatct  
**Blag 5\_03** aattcaagttttatcttgatg-----ataattgcattttgtttgttaactttgta  
 \*\* \*\* . \*\* \*\* \* . .\*\* . \*\* . . \*\* .  
  
**Blag 5\_01** ctgcaatagtgtccaaacttcgtgaatcacccctgtacagatacgagaagctgcttataac  
**Blag 5\_02** aatttaa----ttgtatttttgcctcat-----aaag  
**Blag 5\_03** catgtgaagttttttaattttataccgtattttaaataataagccaatgacaaatgaaac  
 \* \* . \* .\*. \* .\*. \*\*  
  
**Blag 5\_01** ----tgaaattacgagtataaaaaaaaaaaaaaaaaaaaaaga--taagaaggccatgac  
**Blag 5\_02** aatgtgaaaatgtaagcaattatcaataataaagtttaataagtttaagaaggccatgac  
**Blag 5\_03** gaggtggaatttcaaaactccagcaatcgtaataacgtagtga--taagaaggccatgac  
 \*\*. \*\* \* ..\* . \*\* . \*\* \* . \* . \* \*\*\*\*\*  
  
**Blag 5\_01** ttgagtttgctactattctatgtgcacgcaacttttttacaattttacctgcttatcta  
**Blag 5\_02** ttgagtttgctactattctatgtgcacgtaacttttttacaattttacctgcttatcta  
**Blag 5\_03** ttgagtttgctactattctatgtgcacgcaacttttttacaattttacctgcttatcta  
 \*\*\*\*\*. \*\*\*\*\*  
  

3'

**Blag 5\_01** ttttttacatatttttaaattttataaatgttttggtacgctttgtcttatttggcaccctta  
**Blag 5\_02** ttttttacatatttttaaattttataaatatttgggtacgctttgtcttatttggcaccctta  
**Blag 5\_03** ttttttacatatttttaaattttataaatgttttggtacgctttgtcttatttggcaccctta  
 \*\*\*\*\*. \*\*\*\*\*  
  
**Blag 5\_01** aatttaaggaagctattaaatttaatttacott---tttgtcagattttaacaatagac  
**Blag 5\_02** aatttaaggaagctttt-----  
**Blag 5\_03** aatttaaggaagcttttcatttgtattctataataaaatattttaaatagtaaacatttta  
 \*\*\*\*\* \*\*  
  
**Blag 5\_01** ttaata-aaatgttaatttaagattagctatagtttcgaccacttccaacagaat-tgca  
**Blag 5\_02** -----aaatttaaaaaataccgtaactggtttctaacaataaccttac-----  
**Blag 5\_03** aaaaatagaatcgcaaaaacaggtcaactggattattgtttgttcttctacagtatgta  
 \*\*\*\* \*\* \* .\*. \*. \* . . . .  
  
**Blag 5\_01** acgttgtgcacgcagtgatacagagtggtcttggtacagtggtggttagcaagaatcgaaaat  
**Blag 5\_02** ----gttttgtgataattatacttttattactataaacagtttgtcgacaaaagccaat  
**Blag 5\_03** agttagtctaataaaatttacattttttcttctatttggtacttttatagttgtccaata  
 \*\* . \* . \*. \* \* . \* . \* . \* . \*

# Blag 6

**5'**

**Blag\_6\_01** tgtgaataaacaatttacca---taaaatcaactttaacatagtaacgtatacaaaactt  
**Blag\_6\_02** aatatttgctctacttttcactatttaatgaacattattatg-aagactgtgaaatt  
**Blag\_6\_03** aaagagtgtaataaaattttcaactataatagttattttatgcaacaagggtataaaaaaa  
                   \*      \*      \*      \*      \*      \*\*\*      \*\*                  \*\*      \*      \*

**Blag 6\_01** caggggaatcttgtagctgttctaaaaattggctataaaacg-----tagtac  
**Blag 6\_02** -----tttattagtttgagcatattcaagtcatagccta-----cttgat  
**Blag 6\_03** ta-----ttttacggttgagtaaaatcaacatatgctttggatgaactgatcctcgat

\* \* \* \* \*

**Blag\_6\_01** actatgtacaattattttttaagtattacggttcacaagagctgtgctaagcctctaaaaa  
**Blag\_6\_02** atttcatgtcatgaatatgtgaaaattacggttcacaagagctgtgctaagcctctaaaaa  
**Blag\_6\_03** catggccaacattagaatatgtgaaaattacggttcacaagagctgtgctaagcctctaaaaa  
 \*           \*       \*       \*       \*\*\*\*\*  
 \*\*\*\*\*

**Blag\_6\_01** tgtgaaattcatcgataagaatttaattcagtgctgtgaaaataccggtggtaattcgat  
**Blag\_6\_02** tgtgaaattcatcgataagaatttaattcagtgctgtgaaaataccggtggtaattcgat  
**Blag\_6\_03** tgtgaaattcatcgataagaatttaattcagtgctgtgaaaataccggtggtaattcgat  
 \*\*\*\*\*

### 3'

```

Blag_6_01    agcaaaagaaaattaatatccctaactaagtacctattataaaattattgtattatta
Blag_6_02    agcaaaagaaaattaatatccctaactaagtacctattataaaattattgtattatta
Blag_6_02    agcaaaagaaaattaatatccctaactaagtacctattataaaattattgtattatta
*****

```

Blag\_6\_01 ttgattggcaggctgtaccttttggtaacccottaataaagggcagctatcctatttttagg  
Blag\_6\_02 ttgattggcaggctgtaccttttggtaacccottaataaagggcagctatcctatttttgg  
Blag\_6\_03 ttgattggcaggctgtaccttttggtaacccottaataaagggcagctatcctatttttgg  
\*\*\*\*\*

```

Blag_1_01  atttttctctctcat---tgatttcacatatcaatgtctcgggtattttaaagccaattgt
Blag_1_02  attttctctctctccataagaatagctgtagaaacacaagtagtagcctacaatactggt
Blag_1_03  attttctctctctcaaatattcttccctggcaacaacaaaaatcaataagcattgttgga
          *****          *          *          *          *

```

**Blag\_6\_01** agaagttttacaagttgaggaccaacaagacacctgaa-----  
**Blag\_6\_02** attaatTTTgaaatttgataaatagctatttcaaataagt-----aagc  
**Blag\_6\_03** aaaaattctcaataaattacaattcgctttgagcaatgatttttattttatcgtcttacc  
 \* \* \* \* \* \* \* \*

```

Blag_6_01   aaaaacataaaaattattgagagtgaaaataataataatgaacaaagaatattaatatgtta
Blag_6_02   aaagacaattgatataaaatgtg-gtttgatgaatgtatatgagcgtatttacttgcct-
Blag_6_03   aaaggaattccagtg-----actgaacccccccttacagtccta
          ***      *          *          *          *          *

```

```

Blag 6_01  at-ttaa
Blag 6_02  -----
Blag 6_03  ctatctt
            *  *

```

### Supplementary Figure 3

Alignment of the nucleotide sequences corresponding to the 5'- and 3'-ends of all identified copies of BLAG 1 – BLAG 6 retrotransposons, together with the corresponding sequences of the environments of the integration sites. Sequences of retrotransposon fragments are highlighted in gray; no highlighting indicates unique environment sequences; blue, green, and yellow indicate similar sequences surrounding the various copies of the BLAG retrotransposons. The sequences of primers used to amplify the corresponding DNA fragments are underlined.
