# Supplementary material for: R2 and Non-Site-Specific R2-Like Retrotransposons of the German Cockroach, Blattella germanica
Source: MDPI journal article supplement (doi:10.3390/genes11101202), 2020-10-15
Supplement: s1 [file s1]

## A

### >BLAG 1

PPEHRQSILTRQSR TKQSTSSEPQLRNPTDNDQSIVDRQVDVTEINDCSVLNDDLATYKNEMQK  
WKLEFSKNNTNDSFNTKVQEFLNFLARAVHLLPGPKHPAVRFYEARRQRRQFSNQVRYKQSSNP  
ERGTKRARDKRRELYEYQKTQFLFYNQRRKAVRSALNDRHTACKVDINKIFNYFSSRLSTENSC  
ERPAYSSNVTEPERAVLDSTEDSVITKQEVAVAVSKIAADTAPGPDHVLVRALKDATCYEIIAK  
IATTMLQHSFVPECLQKARTVL

### >BLAG 2

PHIHRSTLVTNLTKNASQPLLDEQADRGSSSNSESSQPDSGFNIALNEWKTKFVRTATANDSDF  
DNMVQDFSHFLSTSINLLPGPRHPATKY YEARRKRRLATAEKNYNKSSNP IRASKKAREKRKCK  
YDYQLTQYQFYNQRRKAVRRVLDSTAPSKIDLTKVHENFAASF SIENPHIRSNYPSKLT DVER  
IELDETYDPTISKEDIAIAAHKIAVDTAPGPDHVLVRVIRNEIVYEILAI IATRMLSSGIVPRC  
FKTARTVL

### >BLAG 3

GEAYRKKLSHKYECPLENTKDTDTDSPSSNNPITVADVSSPATQQILQFEKALEECILSSDLNR  
FEEITVEITAYLSKAIASLPGPKHPATHYYNARKLRQTIHGTSYSNTKNPARLSKRKRKDNKQK  
YQYEVAQFHYFNQRRKVVRQIMKNHNNVQCQISIP IIFQHFNTLFNNENPFPTPIESIHPVSTEE  
DIEITEDEIKAAMAKIKIDTSAGIDHVLVRTIKELKTSKLLCLLTNAMLKFKICPGILKTARTV  
LL

### >BLAG 4

PEQHRKSIVMRNTSSVSPVVQ TASKDDNVSNS SANTNSDVGHLHEIRSEVMSFREKFSSLLLS  
PCPSKFNEIYNDFTDTLVTINSKLPGPKNPSVRYE LQRNKNIFAANDRKYKDSSNPQKSKR  
DRAKRREKFQYELLQYQFYNERKKCVNSLLNDNKRNEPCNIPIGVLKEAMEEKGWTLNTSMLDH  
YNNMSPHSQQNDLDQLFTIPVEVIQQSLNKMRTDSAPGPDRI LVRTLKLTECSPVIAVILKIM  
LQWGMVPDRMRGARTIL

### >BLAG 5

PDLHRLKLVERQTTSSYTIWNSGESSSTCKTSINDTPSKSHPVSVNDPLSNYKQQLLTWTTKFD  
CDLTDIDFDTLTNNFLQFLSEAIYYLPGPKHPARKYYALRKKKNKFNCQQSYKNSSNPDRATKR  
DRAKRKQKYQYEQTQFDYYNQRRKAVRRVLTSDKPSCQIAVDKVYAHFNSYFSRPNNCIRPDYI  
SHVTEVERVELNDSFP THITKEEIKFAISRIAVDTAPGPDHVLMRVLKDDAATGVLSLLATRML  
RTGHVPPCLLIARSIL

### >BLAG 6

PHIYRKNITERYANASPCLOKTEINNNSGQLKINENKLEPWEKTFSEILNSEKDEVKLDQKLDE  
FTLFLCNATSLCKGPVHPATKYKARTTW RPNHEKS NFKTSNNPQRHRR LKEKRQNQYRYDLM  
QYYYYYRRKKAVQKIMHLSDYKRC PFSATDVYDYFKETVGTENNNVLHDYSISSPLCNSIDEET  
IDYDCQYCTVTEKDIDQAMKGINLDTAPGPDRLVLFKVVKELKCMKIISI IANIMLSWNYVPNSF  
QSGRTIL

## B

### MAFFT-L-INS-i Result

CLUSTAL format alignment by MAFFT (v7.468)

```
Blag_1      PPEHRQSILTRQSRTKQSTSSEPQLRNPTDNDQSIVDRQVDVTEINDCSVLNDDLATYKN
Blag_2      PHIHRSTLVTNLTK-----NASQPLLDEQADRGSSSNSESSQPDSG-----FNI
Blag_5      PDLHRLKLVERQT-----TSSYTIWNSGESSSTCKTSINDTPSKSHPVSVNDPLSNYKQ
Blag_3      GEAYRKKLSHKYE-----CPLENTKDTDTDSPSSNNPIT-----VADVSSPATQ
Blag_6      PHIYRKNITERYA-----NASPCLQKTEINNNSGQLKIN-----EN
Blag_4      PEQHRKSIVMRNTS-----SVSPVVQTASKDDNVSNSANTNSDVGH-----LHEIRS
              :* .: .

Blag_1      EMQKWKLEFSKNNT----NDSFNTKVQEFNLNFLARAVHLLPGPKHPAVRFYEARRQRRQF
Blag_2      ALNEWKTKFVRTAT--ANDSDFDNMVQDFSHFLSTSINLLPGPRHPATKYEARRKRRLA
Blag_5      QLLTWTTKFDCDLT---DIDFDTLTNNFLQLFLSEAIYYLPGPKHPARKYYALRKKNKNF
Blag_3      QILQFEKALEECILS-SDLNRFEEITVEITAYLSKAIASLPGPKHPATHYYNARKLRQTI
Blag_6      KLEPWEKTFSEILNSEKDEVKLDQKLDEFTLFLCNATSLCKGPVHPATKYKARTTWRPN
Blag_4      EVMSFREKFSSLLLSDPCKSKFNEIYNDFDTLVTINSKLPGPKNPSVRYEYELRQRNKNI
              :  :  :          ::  ::  *          ** :*: :*: *  :

Blag_1      --SNQVRYKQSSNPERGTRKARDKRRELYEYQKTQFLFYNQRRKAVRSAL-NDRHTA--C
Blag_2      --TAEKNYNKSSNPIRASKKAREKRCKYDYQLTQYQFYNQRRKAVRRVL-DSTAPS--C
Blag_5      --NCQQSYKNSSNPDRATKRDRAKRKQKYQEQTQFDYYNQRRKAVRRVL-TSDKPS--C
Blag_3      ---HGTSYSNTKNPARLSKRKRKDNKQKYQEVAQFHYFNQRRKVVRQIMKNHNNVQ--C
Blag_6      --HEKSNFKTSNNPQRHRRLKEKRQNQRYDLMQYYYYYRRKKAVQKIMHLSDYKR--C
Blag_4      FAANDRKYKDSSNPQKKSQRDRAKRREKFQYELLQYQFYNERKKCVNSLL-NDNKRNEPC
              :. :.* * :  :: :  .: :  * :  * : :. :.* * .  :          *

Blag_1      KVDINKIFNYFSSRLSTENSCERPAYS-----SNVTEPERAVLDSTEDSVITKQEVAVAV
Blag_2      KIDLTKVHENFAASFSIENPHIRSNYP-----SKLTDVERIELDETYDPTISKEDIAIAA
Blag_5      QIAVDKVYAHFNSYFSRPNNCIRPDYI-----SHVTEVERVELNDSFPTHITKEEIKFAI
Blag_3      QISIPILFQHFNTLFNENPFT-----P-IESIHPVSTEED----IEITEDEIKAAM
Blag_6      PFSATDVYDYFKETVGTENNNVLHDYSISSPLCNSIDEETIDYDCQY-CTVTEKDIDQAM
Blag_4      NIPIGVLKEAMEEKWGTNLNTSMLDHYN-----NSMSPHSQQNDLDQLFTIPVEVIQQSL
              .  :  :  .  *          .          :          :. . :  :

Blag_1      SKIAADTAPGPDHVLVRALKDATCYEIIAKIATTMLQHSFVPECLQKARTVL-
Blag_2      HKIAVDTAPGPDHVLVRVIRNEIVYEILAI IATRMLSSGIVPRCFKTARTVL-
Blag_5      SRIAVDTAPGPDHVLMRVLKDDAATGVL SLLATRMLRTGHVPPCLLIARSIL-
Blag_3      AKIKIDTSAGIDHVLVRTIKELKTSKLLCLLTNAMLKFKICPGILKTARTVLL
Blag_6      KGINLDTAPGPDRVLFKVVKELCKMKIISI IANIMLSWNYVPNSFQSGRTIL-
Blag_4      NKMRTDSAPGPDRILVRTLKLTESCSPVIAVILKIMLQWGMVPDRMRGARTIL-
              :  *::.* *::*.:::          ::. :  .  **          *  :  .*::*
```

## **C**

### **>Consensus/1-292 Percentage Identity Consensus**

PEIHRKKIVERQTKTKQSTNASPCLQDTDADDNSSNNSINDNPDIGHCSSVNDDLSEYKNELLE  
WEKKFSECLTSDKDDSDFDEITNEFTAFLSTAISLLPGPKHPATKYEEARKKRRNFFAANQKNY  
KNSSNPQRASKRARAKRKEYQYELTQFQFYNQRRKAVRRILNDNSDNPCKIDITKVFEHFNE  
KFSTENNCIRPDYSIFSPLSNSTDPERIELDCTYDCTITKEEIAQAMSKIAVDTPGPDHVLVR  
VLKDLKCSEIIAIIATIMLQWGIVPDCLKTARTILL

## **Supplementary Figure 5**

**Comparative analysis of the amino acid sequences of the BLAG 1 - BLAG 6 retrotransposons located between the zinc finger domains and the reverse transcriptase domain.**

**A** – corresponding amino acid sequences, **B** – MAFFT-L-INS-i alignment, **C** – consensus sequence.
