# Supplementary material for: R2 and Non-Site-Specific R2-Like Retrotransposons of the German Cockroach, Blattella germanica
Source: MDPI journal article supplement (doi:10.3390/genes11101202), 2020-10-15
Supplement: s1 [file s1]

# A

## >R2\_Bg\_Ribo

GTGCTGACGCAATGTGATTCTGCCCAGTGTCTGTAATGTCAAAGTGAAGAAATTCAAGCAAGCGCGGGTAAACGGCGGGAGTAACATGACTCTCT  
TACGGGCACCCTGCCTGTAGGACACGACTGCAGTCTCCCTTCTGCAGACCTCGTCGGAAGATGAGGTGGATGTCGTGATGTCAGCTGGCTCCGGGAT  
AATTTCCAGCCAGGGTTGGTAAGGGGGGAGGAAGTCTAGTGATGCCTTGGGAAAGTTGAAGGCTCCTCTCTCTGACCAAAGCTGACACAGGGGAATG  
GGTATGGGTTGACCCCCATACTCATGAACTCTGGTCTTCGATAACGGTATCAGGCCTCGGACTTGGGGGGGGTATGGTTCGGCCTCCCCCTCGACC  
TCCAGGGAACCACTTGTGTGACGGACTCTGCGTGTCT**ATG**GACGATTCTGGTTCTAACTCTGCCGTGCGCGTCTTGGTAGTTCTACCCCTTCGAGCCTG  
TTTTGTGCCCCGTCTGTCTCTCCGGGCGAGGGGCGAACTACCAGGCACTTAGTCTGAAGGACTACCTTGACCATCTTGGGAGAGCGCACGCGGCAGC  
TGTGGTGGCATTTCAGTGCAGGAAATGCAAACGGGTGAATTCGAAGAAGCACAGTATTTTGTGCATATTAGTAAATGTAGGGGTGAAACTGAAGCA  
CCAACTGCTGCGCCATACCTTGCAGGGTATGCGGGGAAGGCTTCAGTAGCAAGATCGGCCTCGGTGACGACGAGAGGCACCGGCACCCTGTACAGA  
GAAATGAGGCGCAGCACCCCACTCCAAAAACCCACAGCGTGGGGCACCAGCTGATGAgGGTCTCGCTCGATTGGCAATGCTCGAGGTGAACTCGA  
GTCCCGGGGGGGAGTTAAGTTCATCAATAAGGAGCTGGCTTGTAGGTTTGGGAGTCTTACGCCAAAGCAGATTAGCGACCGACGGAGGTGCGGCCGT  
TACCGTGACCTTCTTTTGAAGGCTCGTGGTGGAGCGGTGCGAAACCCCCCTCCTGGGGGGCAAGGGGATGTTCTGCCTACATCCCAAGGACGGGTAC  
GCGAGGAGCAGTGTGGCGTGTACCCAGATGCTGCAGTCCGTGACTCCAAAGTGGAGGAGACTACCGCTTCGATGGCGCGCGAGACCTGTGAATCCGA  
TTCGATGAGGTTGAGTGGCGGAGGAAGCTCTCAATGCCTTGTGGGAGCTCTGCCACGGGACTTCCTCGAAGCTCGGCGGACCAATCGAGACAGT  
TGTCGAGAGGCTGCTGTGAATCAGGGGTCAAACCTGACAAACAGGGCGTTATTGACGGCTTGTATGACTTAGTCATCCGGTTCTTGGCTCAAGCGT  
CCCCCGCATGTGCTGGACCAAGGTCTCAGCGTCAACCTCGCGCAAGGGCAAGGGCAAGAAAGCTCTTAAAGGTTCAAGTTCGGAAGAGTCCAGGA  
GCTCTTCAAACGTGATCCGCGTGTATTGGCAAAGCGCGTGTGACGGGACTTGAACCGTCTGGACTGAGGGACGGGGAACGAGATCTCCTCGAGCCC  
TGTGATGTTTCGAAGGTGACCCAGGATCTCTGGGAGAGAAAGACACCTTCAGACAAATCTTGACTGACACAGGATGCCGAAGCGGATGAGATCCCTA  
TTGATCGAATCTGCTGCCGAATTGCCTGCGACGAGGTTGGGCGTCGCGTGCAGAAATTAAAGAGCAGACGGCTCCAGGGCCAGACGGAATTAACAT  
CCAGGCAGTCCGTTCTGCGCCCCGCCAGGCTGTATTATCAACCTTTTACAGCCTTATCCTTCTCCTGGGACGGCCCCCGGCAGCCTGGCGGGAAAC  
CGATCTGTGTTAATACCGAAAGAGGGGTACGATGTTGATTAATTTGCAATTATCGCCCTCTGACCATCGGATCGATTCTCAGTCGGATCTTTTGGG  
GGATGATGTTTCGAAGGTGACGGGAACTGTTAAAGATCCACCGGTATCAGAAAGGTTTACTACGGAGCCAGGCTGACATAAAATCGAGTCCGATCTT  
CTCGGAGGTACTGAGGCAGGCTAAGTCTGCACGCGGGCTCGTAGCGGTGCAGCTTGACATTTCAAAGGCCTTTGACACTGTACCACATGCTGCGATT  
GCCACGGTTCTGCGCCAAAAAGGCTTCCGCCATATTTGCGCATATGGTGCGCCGTCCTACGAGGGTGCGTACACGTCTATTAGGGTTAGGGACC  
ACCGCATTCAACTGGAATCAAGCGAGGGGTGAAGCAGGGGGACCCGATCTACCTCTGCTTTTCAACATGATAATGGAACCGCTCCTCAACAAGCT  
TGAGTCTCTGGGCGGTGTTACTTTGGCTGACGGCTCCAGCTTGTGCTGCTTTTGGCTGATGACTTGATACTCCTCGCCGAGCAATCGAGAGAGA  
GCACGGGAGTTGCTTGAGACCGTGGAGGAGTTCCTGGATGGTTTGGGCATGAAGATCTGGGCGCCCCAAAAGCGTCGATTGAGATCGTGCCAAACCA  
AGGACTCCTGGTGTGTCGTGGATCCGGGTCTTCGCCTGCGGCAGGGCGGCGCGATCACCTATGCAGGCCCGGATCACTCATTTGAAGTACTTGGGTGT  
TAAGGTGTCCCGTGGGTGCGGGTTGATGTGTCCGACTTGCGCACCCATTTTCCAAAACCTTTGGAGGACACCCGCAAGCTACCATTAAAGCCCCAC  
CAGAAGCTACATCTTTTGAAGACGTATCTCATCCCTCACTTCACGCACCGCTGGTCTCTAGTCTGCCATCGATCGCAGAGCTGAGGGCTCTCGATC  
TGGAGATCAGAGGATGCGTGAAGCAAAATCCTTCATTTGCATCCGTGACCCGCGGATGGCATGCTTTATTCAAAGCCGAAGGATGGAGGGTTGGGAAT  
ACCGTGTCTTGAGGTGGGTATAGTGTGCTCTGCACCTCAAGATGGCCATAAAGACACGGCAGAGCGATGACCCAACTCTCCAAGCACTAGACCCCAAC  
CTGATGGAACGAATGGAGAGGTACATCCGGAGCATACGCATTAGTGAGCTGACTGTGAAAGCAGTCAACTCCTATGCGCGAAGGGTGACTCTGCTA  
GGGTGGGTCAATGGTCTAACTCCCGGTACAGGGTCGCGCGGTTAAGTCTCTGACCGGAGATAGAATTGGGAATTTATTTTCTACGACCCGAGCCT  
ATTTAAAGCCATGTAGATTATAACGGCTTTAAGGCTCCGTTCGAACACCGGGGGGAATAGGACAAATTTGTCAAAGATTAGACCACTCCAATCCGTG  
CAATGTGCGCGCTGTGGTTTCCAGAGAGAGACACTGGGACACATACTTGGGCAATGTCTGCACACCAAGGCTGCACGGATACGGAGACACGACGCTA  
TTAAAGACTTCATCTGCGATAGCGTCACTCGCGAAGGAGACAAAACGGCGACAGTTACTAGGGAGCCTGAGCTTCTCTTGTAGTGGCGACTCGGGTAA  
ACTGAAACCGGACCTGGTGAAGACCTGAAACCGCCAGGGAAGGGTCTTTGTGGTGCAGTAAACAGTCCGCCATGAGGATTCAGATTACCTCAGGCGCGCTCGA  
CGAGAGAAGATAGACAAGTACCAGGCGCTGTTGCCGTGCTCATCGCCAGTTTGGGGCAACTGGGGGTGAGGTGTTGCCCATTTGTTGTGGGCACAC  
GTGGAGCGATGCCCAAGCTTACCATGGAAGCTTTAGCTCAGTTGGGGATTACTGAGCGTGAAGGTTGAAGACCATTAGCCTTATGAGTCTAAGAAG  
TTCGATTGAGATCTACCATGGTTTCTTAGACTACGATGCATCGCTCCTA**TAA**TTTTTGTGTGGAAGGAACCTACCGGCAAGCAGATTGTGAACCAGGA  
GATTGATTGCTCTTACTCTATAGGCCCTTTTAAGTAGGTATCCCATCTACAGGTACCTACCCTTCTTTTGACCGGGGATTAAAGTAAATTTAAGCG  
TTCAGATTGAGGGCAGCTGAGGCCTACTGGTTGCCTATTGCAACGGGCGCAATCTGCGAGTCTTCAGCTGAGTATCAAGCTTTTGTATGTAATTGC  
AGCTGGGGCGGCGAGTCTGCATTGCAGAGTGGACACCTAGCGAGGTTTTCCCTGTAAAGTTTTCTTGACCATAATGGTGGGGGACCGAACTAA  
GTTCCATCTCCTTTCGGGGGGCTCGCTTGCTGATTCTCCAAGCCCTTTTGGCGCAAGAAAAGACCGTCTAAATTAATATAAAGGAACCTTCCCGG  
CAGTGGTTGGGCCGCGCTAGACTCGTTAATCTGTTTGAAGGGGAGATAATGGAGGGTCTCCTCGTGCCCTGCTCTGCACTTCTGCTTCCGCTCCAG  
CTAAGGATGAGGTTACTATGCCTTCCAAAAAGATAGTAAGTTGCACTCGGTGGGGTGTAGTAAGTAGCCAAATGCCTCGTCATCTAATTAGTGA  
CGCGCATGAATGGATTAA**CG**

# B

## >ORF\_R2\_Bg\_Ribo

MDDSGSNSAVRVLVVLFPFEPVL**CPVCLSGRGANYQALS**SLKDYLD**DHLGRAH**AAAVVAFQ**CRKCKRVNSKKHS**IF**VHISK**CRGETEAP  
TAAPYP**CRVCGEGFSSKIGLQ**HERHRHPVQRNEARAPTPKTPQRG**APPDEGLARLAMLEVELES**RRGGVKFINKELACRFGSLTPK  
**QISDRRRSAAAYRDL**LLK**ARG**GAVETPPPGQGQDVLPTSQDASREEQCGVYPDAAVRDSKVEETTASMAPQTCESDSDEVEWREEAL  
NAFVGALPTGLPPEAEALVQACREAAVNQGSNPDKQGVIDGLYDLVIRFLAQASPACAGPGPQRP**RRKKGK**GKKALKRKFGRVQE  
LFKRDPRLAKRVLQGLEPSGLRDGERDLEPCDVRRCYQDLWGERHLQTNLDTGMPKADEIPIDRICCRIACDEVGRRVRRIKS  
TTAPGPDGINIQAVRSAPAQAVLSTFYSLILLGRPPAAWRENRSVLIPKEGYDVRLISNYRPLTIGSILSRIFWGIIDRRLRELL  
KIHRYQKGFTTEPGCYQNVRIFSEVL**RQAKS**ARGLVAVQLDISKAFDTPVHAAIATVLRQKGLPPYFADMVRRSYEGAYTSIRVRD  
HRIQLELKRGVKQGDPI**SP**LLFMIMEPLLNKLES**LG**GVTLADGSQ**LAC**LAFADDLILLADNRERARELLETVEEF**LD**GLGMKIWA  
PKSVAFEIVPTKDSWCVVD**PGLRLRQ**GGAITYAGPDHSLKYLGVKVSPWVGVDVSDLRTHFSKLTEDTRKPLPKPHQKLHLLKTYL  
IPHFTHVLVSSLSIAELRALDLEIRGCVKQILHLHPSTADN**MLY**SKPKD**GLG**IPCL**EV**GI**CS**AL**KMA**IK**TRQ**SD**LQAL**DP  
NL**MER**LVIR**SIR**IS**EL**TVKAVNSYARRVYSARVQWSNL**VP**QRAVKSLTGDRIGNSIF**YD**PSLLK**PCR**FTALRLRSNTGGNR  
TNLSKIRPLQSVQ**CRRCG**F**QRET**L**G**HIL**Q**CLHT**KAARI****RRHDAIK**D**FIC**DS**VT**REGDKTAT**VT**REP**ELL**SGDS**GK**LK**PD**L**VI**TR  
**QGRV**FVVD**TV**RHEDSD**YL**ERARREKIDKY**QALLPS**LIA**OF**GATGGEV**LPIV**VG**TR**GAM**PK**L**TM**EAL**Q**L**IT**ERGLKTIS**LS**MSL  
RSSIEIYHGFLDYDASLL

## Zn finger domains:

#1 YPCRVCGEFSSKIGLGQHERHRH  
#2 FQCRKCKRVNSKKHSIFVH  
#3 VLCPVCLSGRGANYQALSLKDYLDHLGRAH

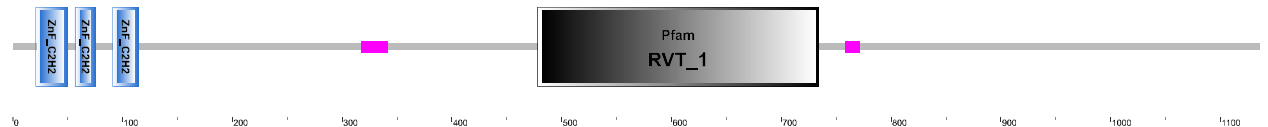

D

C-myb motif:

|               |                                                                                                                 |         |
|---------------|-----------------------------------------------------------------------------------------------------------------|---------|
| Q ss_pred     | CCC <b>HHHHHHHHHHHHHHhH</b> ccCc <b>HHHHHHHHHh</b> cCCCC <b>HHHHHh</b> hhhc <b>HHHHHHHHHH</b>                   |         |
| Q Q_R2_ORF_Bg | APPDEGLARLAMLEVELESRGGVKFINKELACRFGSLTPKQISDRRRSAAYRDL <del>LL</del> KA                                         |         |
| Q Consensus   | 29 rWs~eE~~~La~lE~~~l~~~~~in~~L~~~~p~Rt~eaIk~~~Rr~~~yk~~v~~~<br>.  .+ .+. .+-..+ .....-.. +.  + .+.+.+  ..++..+ |         |
| T Consensus   | 35 ~WT~eED~~Ll~~v~~~~-G~~~~W~~Ia~~lpGRt~~q~k~R-----~Ll~~~                                                       | 84 (95) |
| T lUG2_A      | 35 LWTREADRVLITMCQEQ---GAQPHTFSVISQQLGNKTPVEVSHR-----FREL <del>MQ</del> LF                                      | 84 (95) |
| T ss_dssp     | SSC <b>HHHHHHHHHH</b> CCCC---CSCTTT <b>HHHHHHHHH</b> SSCC <b>HHHHHHH</b> ----- <b>HHHHHHHH</b>                  |         |
| T ss_pred     | CCC <b>HHHHHHHHHHHHHHh</b> ---CC <b>Ccc</b> <b>HHHHHHHHh</b> CCCC <b>HHHHHHH</b> ----- <b>HHHHHHHH</b>          |         |

HHpred alignment with mouse hypothetical gene (2610100B20Rik) product homologous to Myb DNA-binding domain (PDB accession number - 1UG2\_A).

**Probability: 92.4%, E-value: 0.78, Score: 36.1, Aligned cols: 50, Identities: 20%.**

**E**

## Reverse transcriptase domain:

[illegible]

[illegible]

## F

## Cap snatching endonuclease

HHpred alignment with Cap snatching endonuclease, Severe fever with thrombocytopenia syndrome virus (SFTSV). PDB accession number 6NTV\_A.  
**Probability: 95.69%, E-value: 0.031, Score: 60.56, Aligned cols: 105, Identities: 24%.**
