# Supplementary material for: R2 and Non-Site-Specific R2-Like Retrotransposons of the German Cockroach, Blattella germanica
Source: MDPI journal article supplement (doi:10.3390/genes11101202), 2020-10-15
Supplement: s1 [file s1]

# A

>6AR1 (Group II Intron)  
NQGAPGIDG-VSTDQQLRDYIR-----AHWSTIHAQLLAG---TYRPA----PVRREIIPKPG-----GGTQRLGIPTVVDRLI  
QQAILQELTPIFDP-----DFSSSSFGFRPGRNAHDAVRQA---QGYIQ-----EGYRYVVDMDLEKFFDRVNHDL  
MSRVARKVKDKRVLKLRAYLQA-----GVM-----IEGVKVQTEEGTPQGGPLSPLLANILLDDLDKELEK  
RG-----LKFCRYADDCNIYVKSRLRAGQVRKQSIQRFLKTLKLVNEE-----KSAVDRPW-----  
-----KRAFLGFSFTPERKARI---RLAPRSIQRL---KQIRQLTNPN-ISMPERIHRVN  
QYVMGWIGYFRL-----VETPSVLQT-----IEGWIRRR-----LRLCQWL  
>SLACS  
RGAAPGLDG-WTRELLYPLTLD---PALKMEIAAVVKDIINADVSMVEVGRRLQ-ATSLTVLRKPN-----GKYRPIGAESVWAKLA  
SHIAISRVMKTAEKK---FSGIQ-FGVGG-----HIE---EAIKAK---IRKDF-----ATKGLAMLDRGNAYNAISRRAI  
LEAVYGDSTWSPLRWLVSLLLTG-----TGEVGFYENG-----KLCHTWESTRGVRQGMVLGPLLFSIGTLATLRLRLQQ  
TFP-----EAQFTAYLDDVTVAAP-PEELKNVCAATAEAM-EALGIVNNAD-----KTEVLELT---GDTGF---  
-----GTAV---KRVREFLERTWP--DPMS---EEIREGVKEMMETDRLFKAIVELP-LYNRTRWRILA  
MSAMPRTITFLLRNH---DMQHTHRVASW-----FDERTTQV-----MEHILGQ  
>CRE1  
RGTAAPGLDG-WTRELLPLAEDPALLHEITSVVSIMQGGKVA---EVVARRLR-SSAVTPIPKDE-----AGTKIRPIVPESAWLKLA  
SLVAMAEIPSSFKET---FKGWQ-YGVWG-----DVA---KAVAK---IRRDS-----EEHEYLVALDGVNAYNTMSRAHI  
LQAVYAEQRLKPIWGVVVKVALGG-----PGFLGVYRDG-----CLKGNLWSTKGIRQGMVLGPLYATGMAAAGIPVRQ  
RIP-----GVPVTAYIDDITLAASGAEGA-RAAEAYADAL-ETVGVVVTNAR-----KSMVVGPE---GTRVG---  
-----IGG---VDLPV---VAEARILGAHFRARGTPEARTIEWLQAAVEKW---RPIHQKLRQDI-IPKNIAMMTTR  
ISLGSKMTFLLQTH---SPQELETAKT-----ADDEVEQT-----LQHLMGQ  
>CRE2  
RAAAPGLDG-WTRELLVPITED---KGLLTELTAIVQDMLVG---NVHPSFAT-RIRACILHPFR---KEAGSAKVRPITPESALMKLA  
AHIALDSVEKSFST---FKGWQ-YGVWG-----DSTEA---VKRIR---EAYAE-----ASSDTLVALDATNAYNMSRRHI  
LEAAYAQPPELRFQFVGNLSLGA-----AGELALYENG-----AKIHALKSTEGVRQGMVLSPLLFANAMSGIIRPLME  
MHP-----RVKVVAYLDDVTLIGP-HAAVQDFLAEAGPQL-SRVGFDINPA-----KSHHLAKL---EVPEA---  
-----LSV---SGR---TIPIA---QGVVRILGAGFRGDTASVE---EWWWEKTKTH---DHYFEKLQSEW-LPRLARLQLLR  
GSTVPRNLNHLRTH---KPEELNRSTTW-----FDERVMET-----ALNIANI  
>GAU97528\_Ramazottius\_  
VDSAAAGPDR-VLVRVIKQEAUME---VLAVIAAVLLEMNATKE---HPLPSVLQ-LALTVLIIHKG---DVTGDNNYRPIISCSARRVL  
ERVVDRHLRRYGS-----VSRFR-QGFTSAPGTHVNASIL---GSVSK---KAQAE-----QSTVVVVLLDIKQAFEGILHVHL  
KKTILRASPLPTLVRNLLSLQGS-----NRTQLQVGG-----QRSSAIPVKKGVFGVPLSPMLYNMSTDYVTRNMT  
APIAAEYGFPL---CEGEQPVTFGLGFADDSTVVGKSREEAIQLTEMAIGLF-KEIGLEVSPT-----KSKAIVVE---NG-----  
-----VMSEVPLYL---SSG---AVIEATKKGEKVRYLGATVTDQLDF-----DQGEVIKQL---TDQVDRLVHFADHLADQKLNLLN  
QWLLPSIIYPLQTA---PNTILKVFLQT-----VDKIVKST-----VREILQL  
>BLAG 1  
ADTAPGPDH-VLVRALKDATC-----YEIIAKIATTMLQH---SFVPECLQ-KARTVLIYKGG---DDKDLGNWRPITICSVVRRI  
ERILDARLRALVN-----LCENQ-RGFTNSPGTLINTSIL---ESILV---AAKSK-----KKDCTIVFLDISKAFDNVGNHHL  
QNSLSALRIPFKLSSLLILQQRG-----NKTQIETGR-----CRTKPIDIKRGIMQGSPLSPILYNISTDHILDELSN  
QELQDEYGFSLV---SPGLSNITALGFADDTLIAAKSMNSARILVELAMSRF-KEIGLDINTD-----KCRCISII---KG-----  
-----CVRYNPLNL---TSG---QTIASITPDENIKYLGVSYNATIL---DAANSIEEL---KNKLDRLASTPLLPQHOKYTVLC  
SFICPTLIYKFQTT---PLKKLPAKFLSD-----ADVLIKT---LKEVLQL  
>BLAG 5  
VDTAPGPDH-VLMRVLKDDAA-----TGVLSLLATRLMRT---GHVPPCLL-IARSILIHKSG---DVNDITNYRPIITICSVVRVI  
ERTLDRRLKEYVS-----FNRHQ-RGFTSSPGTLMNTSL---RSILT---SAKTK-----KCNATLVFLDIRKAFDNVGHHL  
QKTLESPLIPSLLSNLNLNLEN---NHTRFEINH-----HKTNLVPLARGVMQGSPLSPTLYNLSTDHILNELSE  
DGVAKAYGYQL---VPGLPVTVLGFADDTVIVANSTTSALELTKMAIERF-RSIGLEINFS-----KSVAINIS---CGK-----  
-----LNPYNSLLV---AEN---ATIPCLGPNEFVRYLGVNFADACLF-----DSQVTNLNDL---KNKLDLLISSPLLNPDQKFCILN  
SSICPSLIYTFQTT---PLNKIPNKFIEA-----ADKIIKSG-----LKEILQL  
>BLAG 2  
VDTAPGPDH-VLVRVIRNEIV-----YEILAIATRLMSS---GIVPRCFK-TARTVLIHKAA---DVNILSNWRPITICSVLRRI  
ERVLDKHLRTFVS-----FNEHQ-RGFTTNSGTLINTSIL---RKVLK---TTKDN-----KEDVTVVFLDISKAFDNIGHKHL  
DLTLSAEPKPAKLKDLINLQIN-----NTTNIQTSL-----GQTKAINLRGVMQGSPLSPTLYNLATDFIDELTE  
LSLLQYQYKSI---SPQLSSLSIMGFADDTLLMGKNSETTLELHIALQRF-QEIGLQVNPQ-----KCTGISIK---RG-----  
-----KLVEEVHLI---NEK---FTIKTINNQEVRYLGAFFQDNALF-----DKDSTIKQL---HKKLELASSPLLSKSDQKFLVN  
TAICPTLIYRFQTT---DLQTIPLQLFHT-----ADKLVRST-----LKDILQL  
>BLAG 4  
TDSAPGPDH-ILVRTKLTEC-----SPVIAVILKIMLQW---GMVPDRMR-GARTILIYKGG---ERCSVSSWRPISVCSVIRRI  
ERALDSVLRQYLT-----LNNNQ-RGFVSQLGTSINTSLV---DGCLK---KAKLE-----QRNVSIVMLDVAQAFDSVGLDHL  
EKCLDSQFLPTSCTLIKTITRG-----NFTRIHNKG-----QISEPIELKRGVFGQGSPLSPILFNLSIDFIIKELSE  
KQITDKYGFKI---SNLHDLSVAAFADDLVVGQNMHAARELVMMTKYLL-QQIGLQNLIA-----KVSINIE---HG-----  
-----KLQDKELLL---YSG---YAIRGITKEEKIKYLGVSFNDEIIF-----DRESFITS---RNDLQILVSTPMLRPDQKLNIVN  
QYIWPKFIIYALQMV---PVHKLPLTFLED-----VDKLIRSA-----VKEMLLL  
>BLAG 3  
IDTSAGIDH-VLVRTIKELKT-----SKLLCLLTNAMLKF---KICPGILK-TARTVLLFKGG---DETKLSNWRPISIFSICRI  
EKVINRRLKSYIE-----LSPHQ-RGFINVPGTHINTSII---NGCLT---RAKKE-----KRNCCIAFLDISKAYDNVGHVH  
KRCLLRTNMPNNLRDLVLNLLQG-----NKIQIESGF-----QKTKPIQVQKGVAQGSPLSPGLFNALDDTLKELAD  
PNVREVFQFSL---HPDLEKVSGLAFADNIALISKDEASLQTLINMTVFNL-DAIGLKVNPK-----KCLMLINK-----  
-----NGFLEQGGIL---VGG---QTLEFIKPGEIYKYLGVTFDEIVL---DKSTLIKNF---ENDLNSLTVSNLLTPDQKLNIVN  
QYIWSMLIYPLQCT---PLDKIPSSFLQD-----IDKLLRSS-----IKEIIGL  
>BLAG 6  
LDTAPGPDH-VLFKVVKELKC-----MKIISIIANIMLSW---NYVPNSFQ-SGRTILIFKSG---DPNSLKNWRPITIFSILRRI  
ERALERKIRPFVE-----LSTCQ-RGFISTPGTFINSSI---NSCLQ---KSKKE-----KGDCCITFLDVSKAFDSIGHKHI  
EMSLNSTSIPSQKSLVLSLVKN-----NSVGIELDA-----TTRTKPINIEKGVAQGSPLSPLLFNLSIDFIIYRNLND  
FQNASQYGYRL---TEEVNDLIALSFADDIALISNNETSAVFMIERNVQCL-TEIGLNLNAS-----KSKIIINIK---KG-----  
-----KLMNTTWT---LND---IKINSIQAEETIKYLGVTYNDEIILD---KCSIIITNLN---RSISKLITSSL-LKPDQKLNILN  
QYIWPFTLIYPLQCA---PLCKLQLGFLQD-----IDKIVKNA-----VKEIVGL  
>R2\_PS  
SKTAKGVDG-VGLEELKRVR-----RTLFIINLGLW---THVPESLY-KGRITLIPKKS---LPFLAGDFRPICVLPVVVRL  
HRLILAKRLAIVQ-----HTEFQ-AGFQSGRSTSENIFLL---RTILE---SLPAG-----KESMYIALLDFRKAFFDSVGHVH  
CGLLRDLGLPERLTGYVESIYRS-----VHLTGLGD-----WVFQGRGVQLGDPISPFLFNLMIDYILSGTQA  
GVGVG-----VGERIVSSLAYADDLALLASSRRGLNANLESLARA-RSVNLAALGIN---KCATIGKR---WLGREKK---  
-----MILDREFFL---LEG---VAIPVYRWNNIYKYLGIETSPGAA-----ARWSVTGL---RNRLSKLESAC-LKPQQRMHLLR  
CYLLPGLYYGLIH-----QGISVGLLRS-----ADKQVRAA-----ARKILHL

>RaR2  
NNTAAGPDG-IQPKSWNRISL-----KYKTLIYNLLLY--EKVPHKLK-VSRTVFIPKKD--GSSDPGEFRPLTICSVVLRGF  
NKILVQRLVSLYK-----YDERQ-TAYLPIDGVGTNIHVL---AAILN---DSNTK-----LSELHVALLDITKAFNRLHHTSI  
IKSLVGKGFYPYGFITFIRMYTG-----LQTMQFEG-----HCKMTQVNRGVYQGDPLSGPIFLLAIEKGLQALDK  
EVGYD-----IGDVRVNAGAYADDTDLVAGTRLGLQDNINRFSSTI-KQVGLEVNPR-----KSMTSLV---PSGKEKK-  
-----MKVETGKPF--AND---VPLKELSINDFWRYLGISYTNEG-----PERLSLTI---EQDLERLTKAP-LKPQQRIHMLN  
AYVIPKYQDKLVL-----SKTTAKGLKR-----TDRQIRQY-----VRRWLKL  
>R8Hm-A  
KDSASGPDG-LLLQDVRRLLGP-----LLLCNIFNMWYL---HGIPVEEN-RCRTILLYKSG--DRHLASNYRPVTIGNMLNRLY  
AKIWDKRIRKNVR-----LHVRQ-KAFIPVDGCFENVKTI---QCVLQ---SYRKR-----KLEHNVPFIDLAKAFDITLHDSI  
RKALWRKGVPSPGVVDSLYAG-----AVTSISVGK-----TKTRSICINSGVKQGCPLSPLLFNLILDELAERIA  
TGCGLD-----LDGHVLSMAFADDYVLLAKDSVEMNELIRVCSTFF-KEKGLSVNPG-----KCQSLRVL---PVKEKKRS  
M-KVLVRPHRWRIK--DQD---VDIPSMTYDSLGLYGVSIDPTGK-----IALPIEEW---KNWMTKLKECK-LKPEQKVKLK  
EVVCSRNVYVLRM-----SECGISELRS-----WTRFVRNW-----AKNIIHL  
>R8Hm-B  
KDSASGPDG-LLLQDVKKASP-----RQLCIIFNMWYL---HGIPVVEN-RCRTILLHKG--EKHLTSNYRPVTIGNMLNRYV  
AKIWDRRIRKNLQ-----LHVRQ-KAFVPLDGCFCENVKTI---QCILQ---SYRRS-----RREHNVPFVDLAKAFDITLHDSI  
EKALLRKGI PRSVIKVVDLYAG-----AVTSITVGK-----TKTRPICINSGVKQGCPLSPLLFNLVIDELAERLEA  
TGCGLD-----LEGHVLSMAFADDYVLLAKDSVEMNVLNMCNTFF-EEKGLAVNPA-----KCQSLRVL---PVK-GKRS  
M-KVLTRTRHWKIN--NQD---VEIPSMTYESVGKYLGVMDPAGK-----IALPIEEW---KLWLTRLRECK-LKPDQKVVLK  
EVVCARANYVLRM-----SGCGICELRK-----WSRFVRGW-----VKSIIHF  
>R24\_MR  
KQSASGPDK-ITRDDLRKANL-----ADVGLLNIVFGL---CRTPTLLR-HNRTVLIPKKG--DLSLTSNWRPITVSSIFSRLL  
HKILASRLSNNIK-----LHHAQ-RGFTPCDGMSSSTIL---DAIVR---EHRTN-----GKPLYVLSIDLTAKAFDIHP IAI  
ENSLINKGVQHTVYIMSTYKD-----VDTTIECHG-----ERSSPIRMCRGVRQGDTSPLMFNIAIDDLVTSINT  
TDGVQ-----LGNSKIGCLLFADDIIFVSNTVHGINEHLRRLRAFL-EGTHMEVNPS-----KCRALQLA---RVPGTRK-  
-----VVVDTKPKFS--IDG---ASVPTLRVLEQLKYLGHGYSQSGM-----LAPSPSNL---ESMLERLRRAA-LRPWQKLYILN  
RYLIPRLIHCCQS-----SSITAGRLEY-----MDRLIRKF-----IKKTLHL  
>R2-1\_MR  
KESAPGIDG-ITREHLRSMR-----PDLYALLNIIWGM---KCLPPVLR-SNRTSLIPKSG--NTRELKQWRPIMVSSRVLRL  
NKVIVSRLENEIK-----LNYHQ-RGFTKIDGVMANNTIL---QTAIR---TMRNS-----SKPFIILSIDLAKAFDRSVISVI  
IDALWRRGVDEHTICYIEANYRN-----ITTTIECHG-----KRSRPINVDRGVKQGDPI SGFLFNVVLDGLLQKLHD  
QTGIQ-----INGTNIAALAFADDIVLMAPTMMIRSHRIVESYF-RRHGFEVNVE-----KCATFQYI---PVPGTRK-  
-----LVVETKPLFK--ING---TDVPTLNVSSQLKYLGLQYGRGA-----TCPTPSKT---EEMLSRLGKSP-LKPWQKLVNLQ  
RYLIPRLHHGMQM-----MDVNKKLTY-----LDGCIVKF-----VKETLHL  
>R2Sm-A  
HGTAAGIDR-LTSYDLMRFGK-----NGLAGYLNMLLAL---AYLPTNLS-TARVTFVPKSS---SPVSPEDFRPISVAPVATRCL  
HKILAKRWMPLFP-----QERLQ-FAFLNRDGCFAVNLL---HSVIR---HVHTR-----HAGASFALLDISRAFDTVSHDSI  
IRAAKRYGAPELLCRLNYYR-----STSCVN-----RTELHPTCGVKQGDPLSPLLFIMVLDDELLEGLDP  
MTHLT-----VDGESLNYIAYADDLVVPAPNAELLQRLDRISLLL-HEAGWSINPE-----KSRTLDLI---SGHGSK--  
-----ITALSQTEFT--IAG---MRIPPLSAADTFDYLGIKS NFKGR-----CPVAHIDL---NNYLTEISCAP-LKPQQRMKILK  
DNLLPRLLYPLTT-----GIVHLKTLKS-----MDRNIHTA-----IRKWRL  
>R2NS-1\_CSi  
GNSSPGLDK-LTPRMLRRFNA-----NVLAGYFNLLLS---GGCPHLC-RARITLVPKVP--NPTSPDQLRPI SVSSILVRCF  
HKVLADRWSRRLQ-----LPSLQ-FAFLHRDGCLEATSL---HALLR---HSSAT-----ASNLSLAFVDISKAFDSVSHDTI  
VRSAAEAFGAPSPLVRYIAQSYEN-----AVAVFP-----SSEVHCHRGVRQGDPLSPLLFIMAMDEVGLGSM  
QLGYQ-----FHDTLVDGFADFVWVCAESQARLKEKLEAAAVEL-GRAGMKINAR-----KTKAMVIC---GDRKHR--  
-----ATAVSVEPFC--FAE---ELITPLGPTDTVTYLGIPFTFKGK-----GVFNHRQHL---LKLDEVTRAP-LKPHORMEITR  
NYLIPRLTYSLVL-----QVHRNTLKR-----LDNYIRQS-----IRGWLRL  
>R2Ci-B  
TPSAPGPDK-LTLDGVKRIPI-----AELVSHYNLWLYA---GYQPEGLR-EGITTILIPKIK--GTRDPAKLRPITVSSIFICRIF  
HRCLAQRMETSLP-----LGERQ-KAFRKVDGICHNIWSL---RSLIH---NSKDN-----LKELNITFLDVRKAFDSISHKSL  
GIAAARLGLPPPLITYISNLYPN-----CSTKLKVN---KISKPIEVRRGVRQGDPLSPLLFNAVMDWALSELDP  
RVGVQ-----IGEQRINHAFADDIILVSSTKIGMVSSINTLSRHL-AKSGLEISAG-----KEGKSASMAIVVDGKKKM-  
-----WTVDPPLPRFK--VNS---QKIPALSITQYKYLGINIDAQGA-----RNDAAIRL---TEGLAELSRAP-LKPQQRLYLLR  
VHLLPKLQHGLVL-----SSCAKRALTY-----LDKSVRSA-----IRRWLTL  
>R2Nvec-A  
KKSASGPDG-VPAAALQTMGA-----ASLAAHFNWLWLA---GTQPKRLT-ECRTIFVPKEV--NTHLPLHHRPITIGSVVRLF  
HQTLGKPM EAVLP-----LGSQ-RGFRKGDGICQNIWLL---HTLIR---RSTD L-----LRPLKLVFLDVKKAFDSVSHESL  
LIAAKRLGVPGLLTYINELYSR-----SETVFEVG-----ESSGVKVSQGVKQGDPLSSTLFNCVIDWAVSDLD  
HIGVL-----LGESRVSLAYADDLVLLSETEAALTSQLNSIEKSL-AHCGLKLSTG-----DSGKSASLNIVIDGAKR-  
-----WVWNPTPFLR--ASG---GEIRSLVANETYKYLGINIGAQGV-----KAAEYNAF---KEALDNLSRAP-LKPQQRLFLK  
TYLLPQLHHSVLV-----SRTTGKLLNS-----LDALVRKA-----VRGWLKL  
>R2-1\_MDe  
ADSAAQPDG-ITVNVNIGMDI-----RLRLFLNMIMKR---GRLDDDLK-SARTVLIPKKG--GNIRPENTRPLSITSVVLRLH  
HKILAKRLKSLQT-----FSDSQ-KAFIDCDGTQENLAIL---NTLTL---DARKN-----LKSIHIATLDRKAFDSVSHKTI  
IDSITGMGCPKMFIDYVTDLYLN-----ARTVFQYNG-----SSTFLDIKRGVLQGDPLSPLLFNLVMDRAIVKLSA  
NIGYT-----YNGAIINCIAYTDDIILIAETKCGLSLIDALTSEL-ASFGLQTNIG-----KSSTISLV---PSGRQKK-  
-----IKVITEPSSL--VSG---QFLSAIGVMDVWRYLGVDFRCNV-----LNGSEYGI---DANLRKLDRAP-LKPQQRLKMLC  
VAIIPRYLHSLVL-----GRVNKTKLAG-----FDNLIRKY-----VRKWLYL  
>R2A\_Nv1  
KRTAAGPDG-MTTTAWN SIDE-----CIKSLFNMI MYH---GQCPRRYL-DSRTVLIPKEP--GTMDPACFRPLSIASVALRHF  
HRILANRIGEHGL-----LDTRQ-RAFIVADGVAENTSLL---SAMIK---EARMK-----IKGLYIAILDVKKAFDSVEHRSI  
LDALRRKKLPLEMRNYIMWYRN-----SKTRLEVVK-----TKGRWIRPARGVRQGDPLSPLLFNCVMDAVLRLPE  
NTGFL-----MGAEKIGALVFADDLVLLAETREGLQASLSRIEAGL-QEQGLEMMPR-----KCHTLALV---PSGKEKK-  
-----IKVETHKFFT--VGN---QEITQLGHADQWKYLG VVYNSYG-----PIQVKINI---AGDLQRVTAAP-LKPQQRMAILG  
MFLIPRFIHLVL-----GRTSNADVRK-----GDKIIRKT-----VRGWLRL  
>R2-1\_TCas  
QISAPGSDQ-IPVAAVKTMSE-----LELAILFNII LFR---NVQPSAWG-VLRTTLVPKDG---DLRNPANWRPITISSALQRL  
HRVLAARLSKLV-----LSSSQ-RGFTTIDGTLANALIL---HEYLQ---YRRQT-----GRTYXVSLDVRKAFD TVSHCSV  
SRALGRFGIPSVIREYILATFGA-----QTTIKCS-----VTRTPRMLRGVRQGDPLSPVLFNLMVDELEKVE  
KYEGGSL-----QSGERCAIMAFADDLILIAADRQDVPAMPDDVSTFL-ERRGMSV NPA-----KCRAL IAG---AVSGR---  
-----SVVRTGSSYK--IHN---TPIPNVDALDAFYKLGLEFGHKGV-----ERPTIHNL---SVLNNLRRAP-LKPDQKCLFIR  
QYVIPRLLYGMQN-----PQVTSRVLRE-----ADRLIRRH-----LKTYHYHL  
>R2LcA  
SSTAPGVGD-FSAKQLRSMSP-----RVLNKILNLLLS---ENLPNSFK-MHKTVLIPKID--DPKSPGDFRPITISPVLARLL  
NKILAAARLSKLV-----ISQRQ-KAFLPVDGCGENIFLL---DYILR---SSKKS-----SKSVAMAVLDVKKAFDSVSHHSI  
LRALNEAKCPINFINFVRNSYDG-----CTTKLTCCG-----TSFPDSVRMNRGVKQGDPLSPVLFNLIIDSARIKLPD  
SIGYVI-----RDGLKINCLAYADDLILVASSRAGLKTLLNIVA EHL-SLRGLDLNAA-----KCHGLSII---ASGAKT-  
-----TVSAAADSLD--LDG---QPIKNLGVLDWTYLGIPFSLHGR-----AEKVSPDL---TNLLNKLQKAP-LKLQKLYAVR  
NFVIPRALHGLIL-----SKTNLKE LNT-----LDRAIRVF-----LRTL LYL

>R2L1  
PSTAPGVDG-FSAQQLRSMTP-----RVLNKKILNLLLLC---ENLPNSFK-MHKTVLIPKIV---DPKSPGDFRPITISPVLARHL  
NKILAARLSKLV-----ISQRQ-KAFLPVXGCGENIFLL---DYILX---NSKKK-----SKSVMAVLVDVKXAFDSVSHHSI  
LRALNEAKCPVNLXNFVRNSYDG-----CTTKLTCGG-----TSSPDSVRMNRGVKQXXPLSPVLFNLIIIDS AIRKLPD  
SIXYLI-----RDGLINCLAYADDLILVASTRAGLKTLNIIVAEHL-SLRGLDLNAA-----KCHGLSII---ASGKAKT-  
-----TVVXALESLD-LDG---QPIKNLRVLDTWYLGIPFSLHGR-----AXKFSPDL---SNLLNKLQKAP-LKIQKLYAVR  
NFIIIPRALHGLIL-----SRTNLKELNT-----LDRAIRVF-----IRTLHL  
>R2La  
SSTSPGPDG-VTARMLRSIPA-----RVLNKKLLNLLLF--EDLPAVFK-CHRTVLIPKID--NPTSPGEFRPITISSIVVRQL  
NKIIAARVSEGV-----INPRQ-KAFRQIDGCAENVFLL---DFILR---DAKTK-----IKSLSLATVDIKKAFDSVSHHSI  
FRAIRGARPENLVNYIQNSYSG-----CTTQISVGG-----SISASKIPMNRGVKQGDPLSPVLFNLVINEIIRKLPA  
SIGYPI-----NSELINCIAIYADDLILVTNTREGLKLLGLLNEEL-PKRGLELNAS-----KCFGLSLT---ALGKLLK-  
-----THLCTSDQLD-LHG---TLIKNLTAESWVYLGVPFISHGR-----SKSFSPDL---EALLNKLQKSP-LKLQKLFALR  
VYLIPRLLHGLVL-----SRVAIGELKI-----MDKLILKH-----LRVWLRL  
>R2Lc-B  
TSTSPGPDG-VTARMLRSIPA-----RVLNKKLLNLLLF--EDLPAVFK-CHRTVLIPKVD--NPALPGEFRPITISSIIVRQL  
NKIIAARVSEGV-----INPRQ-KAFRQIDGCAENVFLL---DFILR---DAKTK-----IKSLSLATVDIKKAFDSVSHHSI  
FRAIRGARPENLVNYIQNSYSG-----CTTQISVGG-----SISTTKILMNRGVKQGDPLSPVLFNLVINEIIRKLPA  
SIGYPI-----NSELINCIAIYADDLILVANTREGLKLLNLLNEEL-PKRGLELNAS-----KCFGLSLT---ALGKLLK-  
-----THLCTSDQLD-LHG---TLIKNLTAESWVYLGVPFISHGR-----SKSFSPDL---EALLNKLQKSP-LKLQKLFALR  
VYLIPRLLHGLVL-----SRVAIGELKI-----MDKLILKH-----LRVWLRL  
>R2NS-1\_SMed  
LKTSSGPDN-ISTEVLREIPV-----LVLVKLFNLIILL---SHLPSEFK-SSRTTLIPKVE---TPKDPGDYRPISVSSVVRAL  
NKILASRVSNNGK-----GAHAQ-KGFKALDGCLENTVLL---NCILG---DAKIN-----NKSIALSFIDMKKAFDSVNHDSI  
LRAATIAGYPKLLGLGYIKESYNG-----ADTEVEK-----IKATFKRGVKQGDPLSPVLFNNIVELAIIKKAHE  
SGIGYR-----MNGTVFPIIMAYADDIILLSEKEGLQDLDIVLTEL-RHNGLEANAD-----KCASI IAK---KDGKQK-  
-----KWVSSDSVL---AAG---KTMPCMNANSMYKYLGIYFGPLGI-----TTERLTKIY---SDQLYNIGIAP-LKPQQRLMIN  
DFLLPGILHEAVL-----GNTNVGELKD-----LDMKTRVA-----IRKWLHL  
>R2-1\_PPap  
PGSAAGIDR-ISVQQFQRCVP-----HVRVLLFNVLVV---GHLPGRMS-CARTVFLPKVE---GSSDPKDYRPISITSVITRQF  
HKILAARLTSMHA-----WDERQ-AGFLPVDGCGENLAIL---NELIR---FSRVN-----RRELHLASLDISKAFDMVPRQAI  
INSVAQLGAPQNLVEYLKGLYAN-----NQTTLEYGG-----SELYCRVKRGVRQGDPLSPVLFNLVMEALVRLDK  
KLSFS-----LYGVSUNGLAYADDVILVASTSGGLQKNTESFLGAL-REIGLDLNLIA-----KCKSLSLK---PSGRDKR-  
-----CKVLSSESLS-IGG---TSVPQVDLVGFWRYLGIWFSGPRV-----VSPEQLSM---GVYLERISKAP-LKPQQRIRILV  
DYLLPKYTHGSVL-----GRYTRKTYKA-----MDAQIRSY-----VRKWLHL  
>R2-2\_Tcas  
NGAAPGPDG-IAVSVWNKLP-----EAAALLFNVLVLLG---RCLPAELT-RTRTVFIPKTD---APRTPADYRPIISIASVVARHF  
HRVLSARVQRI PDLF---TKYQR-GFLSGVDGIADNLSVL---DTMLT---MSRR-----CKHLHLAALDVSKAFDTVSHFAI  
VRACRSIFG-----SAETVLEEG-----GRRHFVQVRXGVQXDPLSPVLFNLVLDRAKRLST  
DVGFRL-----TDATKVITALAFADDVVLCAATTARGLQTNLDVLEAEL-RLAGLLNPN-----KCQALSLV---ASGRDHK-  
-----VKLVTKPTFFK---VGQ---NTIHQVDASSIWKYLGIQFRSGSM-----CGCGSEGV---AAGLKRITCAP-LKPQQRMHLR  
VFFLPKFYHAWTF-----GRLNAGVLRR-----LDVVVVRTS-----VRTWLRL  
>R2-1\_PBa  
NGTAPGLDG-ITPRAWNAVVP-----GLRALVFNLLLLA---ETAPLSIT-TTRTVFLEKGGM-SDRPGPSEYRPLSIGSVIIRHL  
HKILAKRLAALDI-----FDARQ-RGFRPVDGVCENITVL---SSVLG---DARR-----CKSLHVACVDLSKAFDTVSHAAI  
HRTLEELGLPREFRDYVRAIYAE-----ARTVLQPTG-----RQMSPIHVGRGVQGDPLSPVLFNLVVDRAIGLSE  
DVGYR-----LESRLINALGYADDIVLLSSTKIGLQENLTRLHAFA-LQNGLTINAN-----KTGVLSMV---ASGRDKK-  
-----VKIDMTPYFT---VGG---ALIPQRSVDVWYTLGGMYPQAR-----EYASVPPL---ANSIRHITKAP-LKPQQRLRLR  
DCLLPRYHRLI-----GTITSKILKE-----MDVLLRAA-----VRRWLRL  
>R28\_MR  
PQSAPGPDG-IGVRQWRAVPP-----SVRALLYNIVLAT---GGFSPALL-TSRTVFVPKKSG--DPDSPGDYRPISVTSVVVRQL  
HKILANRLRASGL-----VDL-RQRCFDDGCGENIAAL---AAVIH---DSRSH-----LRELHVASLDIAKAFDSVSHQAI  
ARVLTTLGVPCELVSVYTTMYAR-----SSTMFEVGR-----QRSELPVGRGVQGDPLSPILFCLVVDLSILRTVPP  
DVGYD-----LGSRRLNALAYADDFLLFAASVWGMQKTLGLVEQRA-GEYGLTFNAQ-----KCSVLSLV---PSGDKK-  
-----MKVITPTPLFH-LGRQ---AFIPQITTAEWRYLGVDFRSTG-----PKKSRI DL---TTYLDRIGKAP-LKPQQRLKLLR  
CFLLPRLYHVLVL-----GRTTLGALRA-----LDVLTRAA-----VRKWLRL  
>R2-7\_MR  
LDTAVGPDG-VTARQWRAVLP-----AVRALLYNIILKR---GSFPASML-ESRTVFPLPKKQ---HSVNPADFRPISIASVVVRQL  
HKILANRLRRTNL-----VDE-RQRCMDGCAENITVL---ASLLD---DARHG-----LKLHLVSLDCAKAFDSVSHHAI  
DATLKECGLPAGFVQYISRTYSD-----SSTRLEVR-----NRSEPIKTNRGVQGDPLSTLIFCLCFDRVARTLSP  
HIGYD-----LNNTRISTLLYADDAFLVSTTAPGMNILLRSVEESA-GEVGLSFNTS-----KCSALSLI---PSGKEKK-  
-----MKVGTPTPTFFK---TSQ---GFIQTITPSQEWRYLGVDFOYSG-----PKKASRSL---KIELERISKAP-LKPQQRLRLR  
VYLLPRYHHLVL-----SRTTLGHLRG-----LDLQVRAA-----VRRWLSL  
>R2-1\_IS  
VNSAAGPDG-FSARLLKSVA-----LLLRVMVNLLLV---RRVPAALR-DARTTFIPKVP---DAVDPSQFRPITVASVLVRQL  
HKILANRLRAEIP-----LNFQ-RQFQVVDGCAENIWL---STALN---EART-----RRPLHMASVDLTKAFDRVTTDAI  
LRGARRAGLSGEFIGYKELYTT-----SRTLLQFQG-----ESLLVEPTTGVRQGDPLSPILFNLVLDEYLSLSDP  
DISFV-----SGDLRLDAMAFADDLIVFASTPAGLQDRDLALVEFF-DPRGLRVNVK-----KSF TSLQ---PGRDKK-  
-----KVVCQDQFT---IGG---TPLPASKVATPWRYLGMTFTPQGS-----INKGTSEQL---DLLLTRTSKAP-LKPQQRLVLRL  
NYLLPRLYHRLVL-----GPWSAALLLK-----MDTTIRGA-----IRRWMDL  
>R2-1\_Rmi  
SSSAAGPDG-FAARELRKVPP-----VILQVLLNLLLLL---KRLPLFLT-QARTIFIPKVP---GASTASQHRPISISHVLLRL  
HKIYFRLLADLD-----LDLQ-RAFLPVDGCAENILL---ATIID---EARKS-----LRPLSLASLDIAKAFDRVVLPAI  
LRALRRKGISEDFISYIEDFYQN-----AVTVLTFGG-----KSLVVHPTVGVRQGDPLSPVLFNLVIDEFLAELDP  
QLAFT-----SEGKVSAMAFADDIILTATHWGLKQQIDRLNSFL-GARGLKINAA-----KSTTLVIE---PSGWQKR-  
-----SKIRTDIDFF---VNG---ERLATTNCTSTWRYLGVHGVKGL-----EKGLVRRQL---AILLERVSKAP-LKPQQRLVLRL  
FYLLPRLYHRLVL-----GPISAKTLLT-----IDRVVRS-----VRRWLAL  
>R2\_FA  
MTTSPGPDG-ITVRQLYLVE-----QLLVRIILNLLMAC---GKMPDSFL-ESKTTLIPKPP---NSTEPGDFRPITVQSVLVRQL  
NKILAARVAQHPI-----LDERQ-RGFRPVDGVAHNIFEL---DMILR---CHRSE-----FRDLRLASLDIAKAFDSITHNTI  
EDTMEVRGFPKPMINYIMACYRR-----SKTRFTFNG-----WISDVTKPTCGVKQGDPLSPILFNLVMDRMIRKLKPK  
EVGVN-----VGSKHYNGLTFADDLLLFATTPPEGLQSSDIIHVLFL-LECGLLINKQ-----KSFVLTVK---AYPKLKK-  
-----TAVIVTEKYM---LDR---HILPAIDREKLFHYLGVPFTAEGR-----CRDDTIAHL---KRKIDVLTKAP-LKPQQRLFALR  
VVILPSCYHILTL-----GGSNLSLLKK-----IDLMVRAA-----GRKWCC  
>R2-5\_MR  
MTTAPGPDG-LTARQIRAVPL-----EVLVRIFNIFLVC---GRLPKHLL-ESRTILIPKDK---NASEPGDFRPITISSVMTRTY  
HKVIARRFAGSIE-----LDKRQ-KAFXPDVGCAENIFDL---DMVLR---YHRES-----FKSIFMASTDVAKAFDSVSHRAM  
YDTLRSKGVPAPLVEYVRDYER-----STTRLTSGD-----WQSDLIRCGVKQGDPLPPIIFNMIDRLKLKLP  
EIGVD-----VGESHFNALAFADDLLFMASSTKGLQTCLDLASEYL-LKCGLRVNAX-----KSFTVALR---NVPHVKK-  
-----SXVDGKVRFR---CLG---HEMPSLKTREDQWRYLGVPFTPEGR-----SSARADEQL---KQTLGKLTSAF-LKPQQRLFALR  
VVVLXGLHHLLSL-----GNVTLSLLRK-----VDKLVRAA-----VRKWLDL

>R2\_Dan  
LSSSPGPDG-ITPKTARSVPE-----GIMLRIMNLILWC--GNLPYSIR-LARTIFIPKKA--TANQPQDYRPISVPSVIVRQL  
NAILASRLSAAIN-----WDTRQ-RGFLPTDGCADNTTIV--DLVLR-----EHHKR-----FKSCYIGTLDVSKAFDAVAHEAV  
YNTLASYGAPKGFINYLRKAYEG-----GGTMLAGNG-----WVSEAFIPARGVKQGDPLSPILFNLVIDRLLRSLPS  
EIGAK-----VGNAMTNAAAFADDIVLFAETPMGLQKLLDTTVCFL-SSVGLTLNTD-----KCFTVSIK---GQAKQK--  
-----CTVVERRSFL--IGG---RECPSLKRTDEWKYLGKFTAEGR-----ARYDPAEDL---GPKLLRLTRAP-LKPQQKLFALR  
TVLIPQLYHKLTL-----GSVTIGVLKK-----FDKLVRYT-----ARKWLGL  
>R2\_DS1  
LSSSPGPDG-ITPKSAREVPS-----GIMLRIMNLILWC--GNLPHSIR-LARTVFIKTV---TAKRPQDFRPISVPSVLVRQL  
NAILATRLNSSIN-----WDPRQ-RGFLPTDGCADNATIV--DLVLR---HSHKH-----FRSCYIANLDVSKAFDSLSHASI  
YDTLRAYGAPKGFVDYVQNTYEG-----GGTSLNGDG-----WSSEEFVPARGVKQGDPLSPILFNLVMDRLLRNLPS  
EIGAK-----VGNAITNAAAFADDLVLFAETRMGLQVLDDKTDLFL-SLVGLKLNAD-----KCFTVGIK---GQPKQK--  
-----CTVLEAQSFY--VGS---REIPSLKRTDEWKYLGINFATGR-----VRCNPAEDI---GPKLQRLTKAP-LKPQQRMFALR  
TVLIPQLYHKLAL-----GSVAIGVLRK-----TDKLIRY---VRRWLNL  
>R2B\_DM  
LTSSPGPDG-ITSQTSAPI-----GIMLRIVNLILWC--GDLVPFPR-MARTIFIPKTV---RANRPQDFRPISVPSIVVRQL  
NAILASRLTAAVS-----WDPRQ-RGFLPTDGCADNATIV--DLVLR---DHHKR-----YASCYIATLDVSKAFDSVAHDAV  
FNTVTAYGAPKSFVDYVRRYSG-----GGTYFNNGD-----WRSEEFVPARGVKQGDPLSPVLFNLIIDRLLRSLPK  
DIGVH-----VGNAKVNACAFADDLMLFASTPKGLQELNLTTVKFL-SSVGLTLNAD-----KCFTISIK---GQPKQK--  
-----VTVVEQRTFC--IG---RARVQLKRSEEWKYLGIHFTADGR-----ARYNPSEDI---GPKLERLMQSP-LKPQQKLFALR  
TVLVLPQLYHKLTL-----GSVALGVLRK-----CDKLVRSF-----ARKLLGL  
>R2\_DPe  
LTKSPGPDG-ITPRTVRSIPS-----GVMLRIMNLILWC--GKLPVSIR-QARTIFIPKVG--NASRPQDFRPI TVQSVVMVRIL  
NAILASRLTSSVD-----WDPRQ-RGFLPTDGCADNTTIV--DLILR---DHHKR-----CKSLYIATLDISKAFDSVSHAAY  
SATLTAYGAPKEFVDYVQNSYEV-----CGTTLNGDG-----WRSEEFIPARGVVRQGDPLSPIIFNLIIDQLLRSPYN  
EIGAT-----IGDHTTNAAAFADDIVLFAETRLGLQTMLDTTVDL-SSVGLTLNSD-----KCFTVGIK---GQPKQK--  
-----CTVVIPEFTR--IGS---RSCPALKRTDEWKYLGITFTTAQGR-----TRYSPADDL---GPKLLRLTRSP-LKPQQKLFALR  
TVLIPQLYHKLTL-----GSVMIGVLRK-----CDILVRST-----VRKWLGL  
>R2\_BM  
WRTSPGPDG-IRSGQWRAVP-----HLKAEMFNAMMAR---GEIPEILR-QCRTVFVPKVE---RPGGPGEYRPIASIASIPLRHF  
HSILARRLLACCP-----PDARQ-RGFICADGTLENSAVL---DAVLG---DSRKK-----LRECHVAVLDFAKAFDTPVSHAL  
VELLRLRGMPEQFCGYIAHLYDT-----ASTTLAVNN-----EMSSPVKVGVRQGDPLSPILFNVVMDLILASLPE  
RVGYR-----LEMEIVSALAYADDLVLLAGSKVGMQESISAVDCVG-RQMGLRLNCR-----KSAVLSMI---PDGHRKK--  
-----HHYLTERTFN--IGG---KPLRQVSCVERWRYLGVDFEASG-----CVTLEHSI---SSALNNISRAP-LKPQQRLEILR  
AHLIPRFQHG FVL-----GNISDDRLRM-----LDVQIRKA-----VGQWLRL  
>R2C\_Ngi  
QNTAAGIDG-LTVGDLKGVSR-----EMLARIFNLFMWC--GKLPHELC-ASRTILLPKPK---GAKVPGEFRPITVTSVLIRTF  
HKVLAERLKVVP-----LDPRQ-RGFRESDGCAENVMLL---DMTIR---YHHER-----RRKMFLALLDMAKAFDSVSFESM  
REVLTTKGIPTPFIEYFMTHLED-----SFTVLQHGN-----WQSGKIHPTCGVKQGDPLSPPIFNFIIMDEMLKRLPK  
EIGVN-----LDGLFVNAMAFADDLSLVANTEQGLQILIDEATSFL-GLCGLRANPN-----KCVTLAIK---TIPKEKK--  
-----TAIDPSSHFR--IGN---AVIPSLKRTDEWVYLGKIFNSNGR-----LISDAKPKL---IKDLELTKAP-LKPQQRLWALK  
VIVIPGILYRGTL-----GSSTAGYLR-----LDCVIRAY-----VRRWLRL  
>R2\_AM  
SSGATGPDG-FSVRSLKCTPS-----RVLAKVFNLFLE--EKLPAFLM-TSRTVLVPKVK---EPKAPTDYRPISVSSTLVRLF  
HKILARRLTLASG-----LDSRQ-RGFVPVDGCAENLVVL---ESAIR---SAKNY-----KRSLFVASMIDIKNAFGSVAHEAI  
FEALSKSGAPDSFVTYVRNCYDG-----FASVVKLG-----RDTAQTTVRQGVQGDPLSPILFNLVIDQIIRSLPE  
TVGVQL-----DANTKLNSMAFADDLILLSSSEAGMRMLGVLAGVS-SKFGLIFHPG-----KCKYLAMI---WAGKQKK--  
-----MKIATDLSFE--IGG---GFMTVPVGTETWKYLGAYLGQIG-----IQPARLSL---QTFLERIAKSP-LKPQQKLYLIR  
VHLLPKLIYPLVM-----APIRASMLNK-----LDRMVRVA-----LTGKDGI  
>R2Ci-D  
VASASGPDG-VSVSGMTKIGA-----RVLCMFLNVWQFT---GRTPRWTK-ENRTTLIAKSAS--AAEDVGDWRPITIGSHVVRLY  
AKLLSRRLGSCVQ-----LNLQ-RAFRDVQGAENVMLL---SGMIR---DAKAR-----SRDLNLVFLDLAKAFDTPVSHSI  
VKALRRQVPEKFVRVYQDLYDG-----AVTTVSVGG-----RATPQLVVRKGVKQGCPLSPLLFNLVLDELIDELSS  
SFGYTL-----DDGSKLSVMAFADDLVLSSGSLAGRLKLIETTQQL-LRCGMGLNVQ-----NCTSLGWK---SMVGKQ--  
-----VRLRTEPFVR--VGD---SELACLGPNSTCRYLGIHFGMVGS-----CRIRREI---RESLLRLASSA-LKPEQKVFMRL  
SFLIPRWYSVTL-----TRTVSFLSW-----IDRVVRMR-----VRAILHA  
>R2-1\_BTe  
KKAAGPDG-LQRDHLTIPGL-----PIIMAKIYNILVYC---SYFPSAWK-ENRTTLIPKINK--PCSLVENWRPITISPIGRIF  
SSIIDGRIRRGTV-----LNMQR-KGFTSENGCKINIELL---NSALN---YSKR-----NSGGIFTIVDISKFDTVPFSAI  
KPCLAKKGPALIVDLIDEMYKN-----VKTTIKTKD-----GGVEIMIRRGVKQGDPLSPLLFNLCLPLELEIEE  
QASGINV-----SEHRKVSVLAFADDIVLLGADAREAQHQINVLTDYL-QSLMMNLSIE-----KCQTFEVV---AKKD--  
-----TWFIKEPGLK--IGN---QIMPTVPDEAFKYLGAIGPWKGV-----HCGVIVPEL---LSVVKVRKLS-LKPGQKVELLT  
KYIFPRYIYHLLV-----SPPSDTVLKL-----LDSEVRQE-----VKTILHL  
>R2-2\_MR  
PKSAAGPDG-LMKRDVIKSGH-----LYILYPMFNLIVAA--GRQPDARW-KNITKLLNKEGK--DPSLPGSYRPIITISPLFSRIF  
WGLIDQQLRLRIN-----ITPRQ-KGFVPEMGCFLNVNLL---NEIIR---IAKR-----KQGIVITQVDISRAFDTVPFSAI  
LNALNAKGLPKVQVQIMDSYSN-----ISTQIQYS-----STFDISIKRGVKQGDPLSPILFNIIVMESLILKLES  
MPGFKI-----NDRTNLSLAFADDLMLFADNVEDARAQNLNLCQFL-DSVDMDISID-----KCAAFQII---TSKD--  
-----SWYIIDPHLT--VAQ---GSIAFLGPDTPLSYLGAKISPVWVG---KTDYSIQGL---KACVGRVQSLA-LKPHQKVELMA  
RHIIPHYLYGLIL-----SIPSISVIRQ-----LDQCVRVA-----VKEYLHL  
>R2\_KF  
KDYAPGPDG-VTKLKVQSMGA-----YPSLLAKVYNLMLT--GYFSSCWK-EHKTSLIPKDRG--SPMDVSNWRPITIGSLLSRIY  
TGLIERRLRTVSD-----IHQRQ-VGFMPVNGCAANLFIF--DECIR---QAKK-----EGTIVGSLIDVAKAFDTPVPHAI  
LRLSSQGVDEHTMAHIRMYSG-----IRTRINGKG-----SDIPLVRGVKQGDPLSPMLFNMVMDPLIRDLQR  
KGFR-----IGGHEIGALAFADDIVLLADSIDGAQDHVDQVGRYM-NKLGMTLNPR-----KSSSFLT---AMRK--  
-----TWICRDPLGS--IGE---TKVPGARPSALKYLGVNYTLSEGL-----ESGALIDKL---MQAVNRARGLA-LKPLQKVNLI  
ERIIKFLYGIIL-----GGPSLTRLHA-----ADKCVRMA-----VKEILHL  
>R2B\_Nv1  
NDSAAGPDG-VTKDDLGRGV-----SIALSKLFNSILLA--GYYPKAWR-ENRTTLIPKPEK--DPADVKNWRPITISSMVSRYV  
SGLLDQVRRAVIK-----CQDRQ-KGFTTEENGCFNSIQLL---DDAVS---NAK-----KAGGVITILDVSKAFDTPVPHAI  
QGCKLEKGIPEYVAAYISSMYRD-----CSTAIRTS-----GDVKIGMKRGVKQGDPLSPILFNLVLEPLERLQ  
TSGVE-----IEGMNLSCAAFADDIVCFANTAPEAGRQLRMVADYL-GRLDMSLSVS-----KCIAVEV---PHRK--  
-----TWYTKNPGLE--VNG---NAVPSISPSETFKYLGAKVSPWKGL---LEGFESDAF---REVISRVRQLP-LKPMQKVDLLQ  
MYIFPRYTYGLIT-----SPPAKAVLKT-----IDRIIRTR-----IKEILHL  
>R2Ame1  
SDTAAGADQ- IKKFHLRKKGA-----LHVFAKL CNLLMLH---RIYPAQWK-TNRTTLIPKPGK--SAAEVENWRPITIGSLLGRIY  
SAMIDRKLRSIK-----QHIRQ-KGFTQEDGCKNNIAIL---SSALT---KMKE-----DSGGIITIIDISKAFDTPVPHGEI  
SQSLMKNKGVSPICEYIQKMYIG-----CKTIIYCRD-----KKTLPVDILRGVKQGDPLSPLLFNLIIDPIIGTLDE  
TTEGK-----LENENISVLAFAADDLVLAKDKETADKQNRLINEYL-DDLKMKVSAE-----KCTTFEIK---RQNK--  
-----TWFLGDPQLT--LGQ---QRIPYADPEAAIKYLGTFNFPWRG-----LCKTSIKEI---IDAARTVKQLK-LKPHQKINLIR  
TYLLPRYIHLKVA-----NPPPLGTLDL-----IDKELKTI-----IKEILHL

>R2\_Rm\_Ribo  
NASAPGPDG-VKKCHVATRAK-----QAVLSALFNTVLLT--GILPAEWS-TNRTTMIPKEGK--DASLLANWRPLTISSVLSRIF  
WGCVDTMRMRVVR-----LTPRQ-KGFVAEAGCFNNVLL-----DSVLR-----HAKC-----GGGVAVVQLDISKAFDTPHCTI  
ATALLNKGLPPFLANLVSRAVVG-----QRTHLNVRG-----EKVEVRNPLVIVKQGDPLSPMLFNLIMEPMINELES  
KPGYRI-----DEETQISSLVFADDLILLASDAPKAQVLLSTVHRYL-CNLGMSLAAS-----KSFAFQVT---RTQDSWCL  
VDPLGLKLSKGDEERC---HNL---EGIPFAGVPDRRLRYLGVSVSPWFGI-----DIRETRANL-----TEVLHKLCLRLA-LKPWQKHLLI  
THLVPHYLPPELVA-----AAPALTTLRE-----LDQELRVV-----VKKIFHL  
>R2\_Bg\_Ribo  
STTAPGPDG-INIQAVRSAPA-----QAVLSTFYSLILL--GRPPAAWR-ENRSVLIPKEGY--DVRLISNYRPLTIGSILSRIF  
WGIIDRRRLRELLK-----IHRYQ-KGFTTEPGCYQNVRIF-----SEVLR---QAKS-----ARGLVAVQLDISKAFDTPHAAI  
ATVLRQKGLPPYFADMVRRSYEG-----AYTSIRVRD-----HRIQLELKRGVKQGDPLSPMLFNLIMEPLLNKLES  
LGGVTL-----ADGSQLACLAFADDLILLADNRERARELLETVEEFL-DGLGMKIWAP-----KSAFEIV---PTKDS---  
-----WCVVDPGLRL--RQG---GAITYAGPDHSLKYLGVKVPWVG---DVSDLRTHF---SKTLEDTRKLP-LKPHQKLHLLK  
TYLIPHFTHRLVS-----SLPSIAELRA-----LDLEIRGC-----VKQILHL  
>R2\_RU  
PSSAPGLDG-VGKIHLVGKGI-----TLVLAKLYNLLFLT--GGYPECWK-RNRTVFIPIKIGK--DLSEVGGWRPLTIGSLLARMY  
SAFLERRIRRVTS-----LSSSQ-RGFTNIQGCCHVNLTL--KEGIR---QAKV-----KNGGVIVSVDIEKAFDTPHSAVI  
FSRLASQGVPLLRKIIISNMYK-----VYTVIEGQ-----CIPIKRGVKQGDPLSPMLFNLIAIDPVLRSLEE  
FQGGPL-----LGNSAIKILAFDDDIILGASSAGQAQQMVMDLIGL-TSCGLGVSHR-----KCGFQIV---NKNK---  
-----TWAIVDPMIT--LNG---SSLPFGSPEDRLPYLGVDTNPWDRK-----SRDAGQRL---ISAAGRGSQLS-LKPQQKINLIT  
TFLLPKFLYLILIE-----DPPSPAYLKS-----IDHDLRQI-----YKNILHL  
>R2\_RL  
PSSAPGLDG-VRKIHLVGKGI-----TLVLVKLYNLLFLT--GGYPECWK-RNRTVFIPIKIGK--DLSEVGGWRPLTIGSLLARMY  
SAFLERRIRRVTS-----LSLSQ-RGFTNIQGCCHVNLTL--KEGIR---QAKV-----KNGGVIVSVDIEKAFDTPHSAVI  
FSRLASQGVPLLRKIIISNMYK-----VYTVIEGQ-----CIPIKRGVKQGDPLSPMLFNLIAIDPVLRSLEE  
FQGGPL-----LGNSAIKILAFADDIILGASSAGQAQQMVMDLIGL-TSCGLGVSHR-----KCGFQIV---NKNK---  
-----TWTIVDPMIT--LNG---SSLPFGSPEDRLPYLGVDTNPWDRK-----SRDAGQRL---ISAAGRGSQLS-LKPQQKINLIT  
AFLLPKFLYLILIE-----DPPSPAYLKS-----IDHDLRQI-----YKNILHL  
>R2Dr  
NASTPGPDG-VGKRDISNWDP-----ECETTLQLFNMWFT--GVIPSRLK-KSRTVLLPKSSDPGAEMEIGNWRPITIGSMVLRIF  
TRVINTRLTBACP-----LHPRQ-RGFRSPGCSSENLEVL---ECLLR---HSKEK-----RSQ LAVVFVDFAQAFDTPVSHHEM  
LSVLEQMNVDPHMVNLIREIYTN-----SCTSVELGR-----KEGPDIPVRVGVKQGDPLSPMLFNLALDPLIQSLER  
TGKGCE-----AEGHKVTALAFADDLALVAGSWEGMAHNALVDFEC-LTTGLTVQPK-----KCHSFMVR---PCRG---  
-----FTVNDPCPWV--LGG---KALQLTNIENSIKYLGVKNPWAGI-----EKPDLTVAL---DRWCKRIGKSL-LKPSQKVYILN  
QFAIPRLFYLAH-----GGAGDVMLQN-----LDGTIRKA-----VKKWLHL  
>R2-1\_GA  
NRSSPGPDG-ITKVALSKWD-----EGIKLAHMYSTWLVS--AGIPKVF-KCRTTLIPKTGDVSLHGDVGQWRPITIASVLRLY  
SRILTERMTVACP-----SHPRQ-RGFIASPGCSSENMLL---EGCMS---LSKAG-----NGSLAVVFVDFAQAFDTPVSHHEM  
LSVLVQKGLDQHVMVELIKDSYEN-----SVTKVHCQE-----GCSTDIAMKVGKQGDSPMLFNLALDPLIQQLER  
EAGLGF-----VNGKSITAMAFADDLAIIVSDSWEGMRANDILVDFC-ELTGMRTQPS-----KCHGFLIE---KSGRS--  
-----YKVNRCPEWL--LND---TALHMGPKESIKYLGQVNPWTGI-----FAEDTVAKL---RQWVVAISKTP-LRPLDKVSLLC  
QFAVPRVIFVADH-----CMLSAKALTE-----MDRSIRQA-----VKRWLHL  
>R2-1\_Ssa  
NNTAAGPDG-ITKPALLEWD-----TGAKLAAIFSIWLTS--GTLPGPFK-KCRTTLIPKTDDPILLTQVAGWRPLTIGSVVLRLY  
SRILTHRLERACP-----INPRQ-RGFISSPGCSSENLMIL---GGLIK---RSWAK-----GERLAVVLVDFAFAFDTSVSHSHI  
LETLRQGLDEHIIGIVGDSYTD-----VTTITIVSG-----EQSPPIDMRVGVKQGDPMSPMLFNLALDPMIDTLER  
YGLGYR-----MGEQQTALAFADDLVLVSDSWEGMACNIRILEEFC-RLTGLRIQPR-----KCHGFLIQ---KIQRA---  
-----RSVNLCKPWI--VCG---EELHMGPEESVSYLGKMPSPWHGI-----MEPDQVERL---CNWISSIGRSP-LKPSQKVRMLN  
VYAAPRMTYQADH-----GGLGPIVLNV-----LDGMIRKA-----VKVWLHL  
>R201-A  
NGTAPGPD-ISKALLDWD-----RGEQLARLYTTWLIG--GVIPRVFK-ECRTKLLPKSSDPVELQDIGGWRPVTIGSMVTRLF  
SRILTMLTRACP-----INPRQ-RGFIASPGCSSENMLL---DEIVR---RSRRD-----GGPLAVVFVDFAFAFDTSVSHSHI  
LCVLEEGGLDRHVIGLIRNSYVD-----CVTRVGCVE-----GMTPPPIQMKVGKQGDPMSPMLFNLALDPLIKLET  
AGTGLK-----WGDLSIATLAFADDLVLVSDSEEGMGRSLGILEKFC-QLTGLRVQPR-----KCHGFFMD---KG-----  
-----VVNCGGTWE--ICG---SPIHMIPPGESVRYLGQVGPGRGV-----MEPDLIPTV---HTWIERITEAP-LKPSQRMVRVN  
SFALPRIIYQADL-----RKVTVTKLAQ-----IDGIVRKA-----VKKWLHL  
>R2-1\_Gav  
SKSAPGPDK-LTLRDLRRAD-----EGDALAELFSLWLIT--GTVPDGLK-ECRSVLIPKTVDRKLGQGNWRPITIGSIVLRIF  
SRVLITARLAAACP-----INPRQ-RGFIAPGCAENLKL---ELLRL---KRKR-----RQPLGVVFVDLARAFAFDTSVSHSHI  
SWVLKAGVDEHIVNLIEDSYQK-----VTTRVQVFN-----GVTPPISIKTVGVKQGDPMSPMLFNLALDPLIKLET  
DGQGVK-----VGSASLTTLAFADDLVLVSDSWEGMLKNISILEDFC-NLTGLRVQPK-----KCQGFFLN---PTCDS---  
-----FTVNNCEAWK--IAG---REITMLGPGESTRYLGLNVGPWVGI-----DKPDLGTQL---SSWLERIGTAP-LKPMQKLSLLV  
QYAIPLNLYQADY-----AGIGRVALEA-----LDSMNRK-----VKEWFHL  
>R2-1\_ZA  
KGSAPGPDG-IALGDIKMDP-----GYSRTAELFNLWLTA--GDIPDMVR-GCRTVLIPKSTTPERLKDINNWRPITIGSILLRIF  
SRIIITARMTKACP-----LNPRQ-RGFIAPGCAENLKL---QSIIR---TAKNE-----HKPLGVVFVDIAKAFDTSVSHQHI  
IHVLQQRVRDPHIVGLVNNMYKD-----ISTYVTTKK-----NHTDKIQIRVGVKQGDPLSPMLFNLALDPLCKLEE  
SGKGFH-----RGQSSITAMAFADDLVLVSDSWENMNKNISILETFC-NLTGLKTQGQ-----KCHGFYIK---PTKDS---  
-----YTINNCPAWT--ING---TPLNMNPGESEKYLGLQIDPWTG---AKYDLSTKL---KIWLESIDRAP-LKPLQKLDILK  
TYTIPRLTYLADH-----SEMKAGALEA-----LDQQIRTA-----VKDWLHL  
>R2-1\_TG  
KGSAPGPDG-ITLGDVVKMDP-----EFSRTMEIFNLWLT--GKIPDMVR-GCRTVLIPKSSKPDRLKDINNWRPITIGSILLRIF  
SRIVTARLSKACP-----LNPRQ-RGFIRAAGCSSENKL---QTIIW---SAKRE-----HRPLGVVFVDIAKAFDTSVSHQHI  
IHALQQREVDPHIVGLVSNMYEN-----ISTYITTKR-----NHTDKIQIRVGVKQGDPMSPMLFNLALDPLCKLEE  
SGKGYH-----RGQSSITAMAFADDLVLVSDSWENMNNTNISILETFC-NLTGLKTQGQ-----KCHGFYIK---PTKDS---  
-----YTINDCAAWT--ING---TPLNMIDPGSEKYLGLQFDPWIGI-----ARSGLSTKL---DFWLQRIDQAP-LKPLQKTDILK  
TYTIPRLIYIADH-----SEVKTALLET-----LDQKIRTA-----VKEWLHL  
>R2-1\_Gfo  
KGSAPGPDG-IALGDIRKMDP-----EYTRTAELFNLWLTS--GEIPDMVR-GCRTVLIPKSSKPERLKDINNWRPITIGSILLRIF  
SRIIITARLTACAP-----LNPRQ-RSFIISAAGCSSENKL---QTIIR---TAKNE-----HRPLGVVFVDIAKAFDTSVSHQHI  
IHVLQRRVRDPHIIIGLVKNMYKD-----ISTVIITKK-----NTYTDKIQIQVGVKQGDPLSPMLFNLALDPLCKLEE  
HGKGFH-----RGQSSITAMAFADDLVLVSDSWEDMNANIKILETFC-DLTGLKTQGQ-----KCHGFYIK---PTKDS---  
-----YTVNNCAAWT--ING---TPLNMNPGESEKYLGLQFDPWVGI-----AKTSLPEKL---DFWLERIDRAP-LKPFQKLDILK  
TYTIPRLTYVADH-----SEMKAGALEA-----LDRTIRSA-----VKDWLHL  
>R2NS1\_CGi  
KDSAAGPDE-IELKTVMAKDP-----KGXILVNLFSFLYR---KKVPEIFK-GNRSILLPKGND--GLEDVNNWRPLTISSSVLRIF  
TSLLARVRVLDSCA-----LNPRQ-RGLIAAGCSSENSFL---SEMIN---HAKKE-----RRQLCVTFDLAKAFDTSVSHKH  
IAGLRRFGSPHEFIDIVADLYNG-----ASTVFQTD-----GQTGEIPMTRGVKQGDPLSPMLFNLALDPLLEVIGR  
QNNGY-KFGP-----EESDRIESLCYADDNALMTESPDENMENLALVEKFC-CETGMRLNIK-----KSATFCIT---PCGSRSY-  
-----TWNTTKTKVA--IKG---ERVPIPPDGCMKYLGSKMSPVWTK-----IRKDIVAQL---EGMVESIGGAH-LKPRQKLVLLN  
HYALVRLTYALTQ-----DAYPXXVLGK-----LDLIVRAA-----IRRWAKL

>NeSL-1\_TV  
HLSAHGLDG-IPNSVYMLFPVS-----AAKFLSILFRSIIIS--GHIPDCWK-LSKTVMLFKKD---DPSLAKNWRPISLGITSCTYRIF  
MTLVNKAQMIPM-----PHAMQ-KGFVRGATLSEHIAVA---NEVLC-----QSTRT-----QSEMFQTAIDFTNAFGTVPHQLI  
FDSLEAKKVPDSIINLLKDLKYG-----ARTAIYTRH-----AHSEIVPVRGVIQGCPLSPILFNCCLDPLLYAVQR  
RHPEDGYRFQD---KAGQYSIAIQAYADDVLVISPTHEGMQRILNTVDEFQ-KIAKLKVAPQ-----KCVTLAKT---STA-----  
-----IQPFR---IGP---DEIPIKTSMDNITYLGIPISGTTKTSRF---AAATGILEKV---KAQIRVVVFASH-LALSQKIIALR  
VFILPQLDFYMFH-----NVFRVNDLKA-----TDQMIRGL-----IDKEAPT  
>Utopia-1\_ACa  
NGSAPGIDG-IPYEAYKRTKL-----DATLAHVFEVVRNL--ARLPARWD-VARTVLLYKKG---DPNDTGNWRPISLQVTIYKIF  
TAALSKRLISWAGKHNT--FSASQ-KGFLPAEGCHEHAFVL---RSVLD---DARRH-----KQNVYLAWYDLRNFAGSVSHDLI  
AWCAAMLGLPRYLRLDAIGAIRH-----SALFVQVGD-----QETTVIPMRGCVKQGCPLSPILFNLCVPEPALRCLRR  
TTGYKPY-----GTSITVEGQAYADDLLTAAPSAYHAARQVATIEWA-NWAGVSFVVQALSLDAPAGKCAALAIN---FEGG----  
-----LMHSDIPALK--VQG---AAIPAMSRNNVRYLGVHVGLTDALG---QANELLEKA---SRDARTICASG-LEFPWQKVVAIK  
TFILSRLPFFHHN-----GKIQRGRCQQ-----FDRELREN-----LRAALRL  
>Utopia-1\_LV  
TNSAPGKDR-LEYRHRRADG-----SFSISEAIFNKCLAE--GRIPAPWK-TASTILLHKAG---PTDDPANFRPIALQSLCYKLF  
MAVLADRLTKWACENQY--LSPEQ-KSARPCGECFEHSFLL---SAALK---DCRRN-----QKTICIGWLDLRNAGFSIPHVI  
KIVLSSSLGVDSLVTTLLMDAYNG-----ASTSFTLTG-----GQTDTPVIRSGVKQGCPCMSPIILFNLAIELIIRAVKK  
NASDNHLGVT---VQGNKLSILAYADDLVLLSRDTGLQSLQVAGSSA-STLQMOKFKPQ-----KCATLTLDD---CKR-----  
-----GTNVQRSAHH--IQG---AAIPSLTEERYRYLGVPIGLPRLT---SLQESSRKL---SSDIETISSSL-LAPWQKLDAIK  
TFVIPILQYTLRA-----TEYLSKDLKP-----LRAAIKH-----VKKICHL  
>Utopia-1\_CF1  
TNSAPGPDG-ITYRDLRGADP-----GARLLAALFNACYRL--EAVPASWK-TSNTVLVYKKG---DRDSLENWRPLALGDTAPKLF  
AAILADRLMTWAVTNNK--LCPAQ-KGFLRDEGCEYHNFVL---QEILT---DARRT-----RRQAVVAWLDSLNAFGSVPHAAI  
RRALVRSGVPGGLVNVWNSMYDG-----CSTRVRTAE-----GYTTPVLIRSGVRQGCPLSPIVFDLAIDSVLRAYTA  
VDAGFD-----LLGSRHSVVAYADDIALVADSPGMRRLLAVAEGAA-SSVGLRFPNA-----KCATLHLA---AGS-----  
-----GGRVLPPTTFV--IQG---QPVHHLSSGEPYRHLGVPTGSSVDQ-----TPPATIGGL---LEDLRAVDQSL-LAPWQKLEVVA  
TNILPRLDFLLRG-----ATVGKPLKA-----ADLQVRM-----AKSWLNL  
>Utopia-1\_AEc  
NNSAPGPDG-VSVYRDLRGADR-----GARLLTALYNICLRL--EAVPASWK-TSNTVLIHKKG---DRGMLENWRPLALGDTVPKLF  
AAILADRLTDWAVTRGK--LCSAQ-KGFLRDEGCEYHNFVL---QEVLT---HAKRS-----KRQAVVAWLDSLNAFGSIPHATI  
RRALIRSAVPRGLIAIWDSMYDG-----CTTRVRTAE-----GHTAPIRIRSGVRQGCPLSPIIFNLAIIDSVVRVAAE  
XNDGYS-----LHGNTWSALAYADDIALLAQTPEGMERMLASVEAEA-ASVGLRFPNA-----KCATLHVH---AGN-----  
-----GGRVLPSTFQ--IQG---ETINPLAQGESYTHLGVPTGFSVDQ-----TPYAAVGDI---VSDLRAVDRSL-LAPWQKIEMLG  
TFILSRLDFLLRG-----ARVFKGPLTA-----VDLNIIRH-----VKSXLNL  
>Utopia-1\_CMy  
KNTAPGKDG-IPYSLKKRDP-----GCLVLATLFNQCKRF--CRTPSSWK-KAMTVLVYKKG---ERDDPSNWRPISLCSTMYKLY  
ASCLASRITWESVSGGA--ISSIQ-KGFMSCEGCEYHNFVL---QTIE---TARRA-----RRQCAVAWLDLANAFGSMPPHHI  
FATLQEFMGPENFLRVIREVYEG-----CSTTIRSVE-----GETAEIPIRSGVKQGCPLSPIIFNLAMEPLLRAISN  
GTDGFN-----LHGERVSVLAYADDLVLTADDPESLQGMLDATSRRA-DWMGLRFPNAK-----KCATLHID---GSK-----  
-----RDSVQTTGFQ--IQG---EPVPLAEGQAYQHLGTPTGFRVRQ-----TPEDTIQEI---LQDAAKIDASL-LAPWQKINALN  
TFLIPRISFVLRG-----SAVAKVPLNK-----ADKIVRQL-----VKKWFL  
>Utopia1B\_CPB  
KNTAPGKDG-IRYHLLKKRDP-----GCLVLAALIFTCKQF--HRVPRSWK-KSMTVLIHKKG---ERDDPGNWRPISLCSTIYKLY  
ASCLAARITDWSVCGGA--VSSVQ-KGFMSCEGCEYHNFL---QTAIQ---EARRS-----KRQCAVAWLDLTNAFGSIPHHHI  
FATLGEFGMPETFIQLLRDLYKD-----CTTIRATD-----GETDAIPIRRGVKQGCPLSPIIFNLAMEPLIRAIS  
GPTGFD-----LHGKKISILAYADDLALVADSSSLQOMLDVTSQAA-EWMGLRFPNK-----KCASLHVD---GGA-----  
-----RALVRPSRFL--IQG---EPMASLEEGEVYQHLGTPTGVRVRQ-----TPEDTIAEI---LRDAAQIDSSL-LAPWQKINALN  
TFLIPRISFVLRG-----SAVAKVPLNK-----ADSTIRQL-----VKKWLYL  
>Utopia-1\_ENe  
LRSAGPDG-IRFSVYKQFADV-----LIPAMSAIYNACSKH--RQVPRKWK-ESVTVLIPKGG---DPKSVKNWRPINLQDCIYKLY  
AALWAQKIAAWAKSGV--ASKSQ-KGFMPVNGCHEHLFLA---QSLN---STRRS-----KKPLYMTYYDLQNAFGSISHQLI  
HVVLQAQRLPKHAQEVIMDLQYQ-----ASFCLITKE-----GCTGRIVNQRGVKQGCPLSPILFNLAIEPLQLRLAA  
CNEGLELRITD--GKPVQKVSHMAYADDLKTVAATRVGISKLHQVVEDFL-QWTGLKANPS-----KCATLGLK---VQKA-----  
-----KQVPDPVKLT--LHY---EVLPPVVLGEAYKYLGIKDALESPVQQ---SQILRAMSRI---KKDLNKLRLSE-LLPWQKLDALR  
TFVMSRLDYLRH-----CYPYKQLVA-----FDVYVRAA-----LKAFAKL  
>R5-2\_SM  
DNTSPGIDG-IQYKDLALLDP-----EGILLSFLFNKIIS--KIIPTSWK-TFKTILIPKPKDKTDNYDKVSSWRPIALLSVIYKVF  
ASILTTRLTWSWICNDI--LHIGQ-KGGSVHEGCVHEHNSIL---SSALE---HSKYS-----KNSPLAIAWLDIKDAFGSVPHDYL  
WSVLKTIQVSEEFITIVKLYTD-----TQSFYSCGP-----IVTPNLSIKKGVKQGCPLSMILFSAINPVEAISR  
SCIEPFM-----IGDSPVQVLAYADDIALVANNVENLQKIVDVAVEAA-TEIGFEYRPE-----KCGYMQLP---RVN-----  
-----INGEIL--INE---KEIKKLSKEFYQYLGVPVGEDNDQ---SPYAILDKV---VSDTKKIADSG-LFGWQKLKAYK  
IFIHSRLTFAFRT-----REIKTMALSA-----SQGNTNSCGNNSSKLRGHLRRLNL  
>R5  
SKSAAGLDW-ITYEDIKLGDP-----SGEILQPIFEYIVQN--NICPSEK-ASRTIMIPKPGK--SDYSDPSSWRPITITSAYVRL  
MKYLTWELYNWILLNQM--LSRSQ-KSLGKPEGCHDHANML--NMLIQ---DVRRTQNTSPNINKNKRLYIVFLDFTNAFGSVPLDTL  
MYVPQRFGLGTSALTLIKLYLD-----NYTNVTCGE-----SKIENVKLNKGVKQGCPLSMILFNFINIIIRAIEA  
MPDVHGYP-----LGMDIRILAYADDIALISDSHKDLQEMVYKAEYIG-RILGLLFNPS-----KCALMDIP---HDK-----  
-----KRTPPI--VNG---EMIKCVGKADPYKYLGTFRSFRKL-----DIKELLQMM---MDETKLITESN-LHPHQKIHAYE  
TFIHSQLPFHLRH-----SRIPFSDFITNRKTNKTTNNSNSEKSIQKAYDPE--SGQLFLNTFAL  
>R5-1\_SM  
THSAPGSDK-ITFSDWRRLDP-----DFEFLAALFNNILRT--GKSPNKWK-TFRTKLIIPGKEHSPHEVSSWRPLAILDTAYRFF  
ATILNRRLLSWIAKRN--LCSNQ-KAVGIPDGCAEHNTVI---SLAKE---WAVIN-----GKDINIVWLDLADAFGSVPHDLI  
WHSLSRLKLKNKTINLIKDMYND-----CYTVYECG-----KHTKTIKVNNGVKQGCPCMSMTLFSLTINFILQNILK  
EYPLI-----IHNHNISIMAYADDLVLIADTREKMRKMIKDITKYT-DSATLKFRPS-----KCGYFQLK---RNH-----  
-----NDPPIT--LYD---EQIPIIDENHLYKYLGVDFGQKGKH-----NIDTILNTA---LDDTTKILSSD-LHPAQKLQAYK  
TFIHSRLIFPFRN-----CNINHMTLDT-----NRNRTVQH-----REKQLGF  
>LIN9\_SM  
TDSAPGEDN-IPLRQWIIWNN-----DGVLFDMFNYIKRT--HDIPDMWK-NYTTTLLIKPGKSQESNIPANWRPISILPSTYRIF  
MKVLNKRVLWEANRGL--ISKWQ-KAVDKANGCDEHSYIQAALIEKAN--RSYK-----NEQCHLAFDLADAFGSIPFQVI  
WHTLKNMGMDDEETINLLKEYKD-----CSTKYKCGK-----NESEKIKITKGVQGCPLSMTLFSLCQYLIQGIAE  
KKKGAT-----IAGQEVCLAYADDLVIVANTAKDMQMLTTIENLA-KQADLIFKPA-----KCGYRDP---RDK-----  
-----KSMK--IYG---KEISIVDEKNVYTYLGVRIQDTKKK---DLNVRFEV---KKKTTAIFKSK-LRSDQKLEAYN  
IFCQSKFVYILQG-----EDIAKTKIET-----YDEIKKM-----IKEDILK  
>R4\_Hme1  
NWKAPGTDN-IHNYWYKLTCT-----HSLLLKHINQFIQSP---CTLPLFIT-NGITYMLPKGL---DPTNPANYRPITCLQTIYKII  
TACITDIIYKHIDQNNI--LAEQQ-KGCRKNSQCKEQTLTI---DAIV---MKQAH-----NKNXNTMYIDYRKAFDSVPHSWL  
LYILKKYKIHPIILITFLSSVMLS-----WKTRLKLNNN---ETLITDWIKIQRGIFQGDALSPLWFLCALNPLSELLNN  
TNTGFKLKH---NTYHIIISLMYDDIKLYASNKELKILADLTQSFS-TDIRMEFGIE-----KCKVHSIK---RGKS-----  
-----QONTYIL--NTG---EQIESMDENSTYKYLGFQQAQIQK---QTKIELTNKF---KFRLNQILRSQ-LNSRNIIKAIN  
TYAIPILTYSFAI-----INWSQTDLSN-----LQRIINTH-----MTTHRKH

```

>R4-2_AS
PFKAAGPDG-IHAYWKKHLP-----AGKLLGNIIVWLVT--GKVSCRWLMRGRTVLLPKKG---DLRLPQNYRPITCLNTCYKLL
TATIAKALLRHLDKGEA--IPQQQ-RALRKKEWGCTHAILL---DRAVA----TDATTQ-----KGRPLSIAWLDPKKAFDLSHSHYI
RWILESNNVPKTTATTFFKLMAG-----WETRYELKYKTRGCMISIQRSQPVKIVNGIFQGDALSPLLFIILSVSPISFALEN
KAKPYRSSVQ--LSGKGFSLGHQFYVDDDKIYAPNRRRELNVALVAKNIS-TAIGLDLNV-----KCAQAHYT---PNVQ-----
-----QLEVTFLADEEP--LMELPVLGLRQSYRYLIGIDQKFLATKN----ALQRFEEESL----FNRSALFRSD-LTWQRQMSNAFQ
SIALGGLRYGFLN-----TNGAGQKLSE-----ALKHARDI-----DVRIRSL
>R4_AL
PWKAPGPDG-LHAHWKALPS-----AKRLLGELVVDLWLT--GKVTGWMCRGRTILIPKKG---DRGDPSNYRPITCLNTCYKVL
TSVMNSVILSHLSRGEA--LPMNQ-RAMRKREWGCTHAMVL---DRAMV---MDAMAQ-----KKHLSVAWLDIRKAYDSVSHEYI
RWAINSVNIPRSVQLTLKRLMSD-----WETRFESTQCR----PKLRSDKMKVNLNGIFQGDLSPTLFLVLCIAPISYALNK
GVGQCQSSSGW--SAGYGFEIGHQFYMDLKLARTPAMLDLQVQVSEVS-EAMGLHLNLS-----KCAKAHYA---PHGA----
-----GGAQEAVEGAEGSRKGEIPIGLRSTYKYLGVQRLPMEV----ALKEFEDKF----MDRAETIFASE-LTWGQMATAYN
TIAIAGLRVYYSN-----TNGASPKLLE-----ALKRAATL-----DTRIRDL
>R4-5_BX
PNKAAGPDG-LPGCVWKCLPNA-----SNWLCTWLIIKKLACS--RIDTPRWLS-EGRVVLMMKKG---DPNDPANYRPIACLNTCYKLM
TSVIERAIREQVTACTP-LIPSEQ-VANRKGVGCTHASIV---DRLVTGTAAMSKGQ-----NADLRVLFYDCKKAFDVSVRDHM
FRVLDVAGVDRKIYYLLKSTMN-----WTVRYELRRSG----RVERSAPLRVKRGLLQGDLSPTWFLCLCIAPISHALRL
RNPGPCIRQVAGHSDGGQVHVSHLFYMDDLKVYCTGEAAQVRAERLVPFL-SQIGLCVNES-----KSAAGAAGP---SR-----
-----TLR---SSLPLLGVDQKYKYLGIESGFVANEA---SAYSRMQTTI---LAKVQSILDVEGHTVQGRRRIAIR
TVAFPGAALFLGNIILGDKQPNSAKADMLK-----LDMVIREK-----IRRKGLL
>HERO-1_BF
AGSAPGPNQ-VSYQIYKCPK-----VVRLLWKLFRVAWK--QCIPSAWR-RAGGVLPKKE---VSTDIKQFRNISLLNVEGKLF
FSILTKRMITYLLANNYIDTEVQK-AGVPGFPGCIEHASTI---WQQIQ---MARRQ-----KEDLHVVDLDTNAYGAVPHSVI
HYALNFWFVPTIRMTIQNYFQD-----FRVSVTTTPQ-----FTTGWQOLEKGIAMGCTISPLFLVLGFEIFLIGARQ
VAGGIKLP-----SGQRLPPLRAIMDDVTSILRSAPCTRRVLQLEELT-DWARMRFKPS-----KSRSLSLR---KGK-----
-----SSNRVFS---INN---QDIPTIQ-QEPVKSLGRLYTSDIADT---KRQQLVKQA---VEGLRAIDKCE-LPGKLVKWLQ
SVLIPRLKWPMMK-----YDIPLSTADQ-----VEGKANSF-----VRKWLGV
>HEROTn
NNSAPGPNQ-VPYLVIYKCPK-----LLARLWKILRVIWRR---GKVAHQWR-WAEGVVPKKE---KSTLIEQFRTISLLNVEGKIF
FSILSHRLSDFLKNQYIDSSVQK-GGIPGVPGCLEHCGVV---TQLIR---EAREG-----RGLAVLWLDLANAYGAIPHKLIV
EMALARHHVPCSIKTLIMDYDS-----FHLRFVTSG-----SVTSEWHRLEKGIITGCTISVIFALAMNMLAKSAEP
ECRGPITK-----SGIRQPPIRAFMDDLTVTTTSVPGCRWILQGLERLM-TWARMRFKPG-----KSRSLVLK---AGK-----
-----VTRDFRFY---LGG---QDIPSVS-EKPVKSLGKMFDSGLKYA---FSIRETNDQL---GHWLTLVDKSG-LPGKFKAWVYQ
HGILPRILWPLL---YEFPISTVEG-----LERRVSSC-----LRRWLGL
>HERO-1_SP
NASSPGQNG-IPYKMYKCPK-----LLKIIWKLMLDVWRT--KYIPVQWR-VAEGVYIPKSAT-PNEKTIITDFRPIALLNVEAKMF
FAIPAKRLETYMRKNGYLDTTVQK-GGVGGHPGVWEHVATL---WEVIK---DAKTS-----QKNLVAIWLDLANAFGSVPAAI
AFALKWYHLPESLVSLMNNYVVG-----LYARFSVKD-----WNSEWQKFSVGIFMGCTLSPILFVITFNLLNDFLKS
TPAKQYHLK-----RDFNVPMKEYMDDITITASVESAGSILSKVNDPM-DWSKMRIPV-----KSRSLVVH---GGK-----
-----VKHIEPFA---VDG---QTIPGVH-NKPVKFLGLRIDGNLKN---VARQDMVSL---GRWLHTIDKCV-LTGVMKWCWYQ
YLIVPRMQWKLMI-----YDVPVSQVEK-----METLVSKK-----LRRWLGA
>HERO-1_HR
AKATPCPLDQISVIALKRCPI-----LRTYLHKLIVKCWNA--GTIPLCWR-KALTILIHKKG---DANDPANFRPITLQPVLKIF
STLIKRLNHLNQLQNNFISTNIQK-GFYPTLDGLAEHTQML---SHLMK---DAKRY-----QRSIIALLDLRANAFGEVNHQLI
NSILLYHHVPQLFRNLILSIYS---YAISVSIND-----QLTPLLVRKGVLGQDPCSPLLFNLCFNPLMKILEG
DEPKQCGYLWG--PTSDVRARSWLQFADDTAIIAHNSESQAKLIDLNLAWC-RWSDMQMRVD-----KCCVFGMM---KKDG----
-----SYDQFLPRLT--IDN---IPIPPVELGSGFYKLGKIYDAELKDT---KAKEEMVSKL---TRLKRTTDLK-VSTQMKLQVLR
RFIPSQLKFELRS-----YNLSLTWIKNN-----LDNMVTEA-----VRDWLTM
>HERO3_BF
ATSAPGPDG-IMYGLKHLPA-----CHLFLSTLFSKLLES---GDPPTSWS-SGNVSLIHKDG---SPEAAENFRMICTLSCVSKIF
HQLLSERWAKYMTCSNLD-IDPETQKAPLTGINGCUEHVQVM---REILA---HAKKN-----RRTVHITWFDLADAFGSVEHCLI
YYQMERNNGFPPIITTYIKNLYSR-----LKGKVKGPG-----WESDPFPFGRGVFGQDNLSPIIFLTVFPQPLQLHLKG
VEQQHGYN-----LNDKHYVTLPFADDFCLITTNKRQHQKLITQISSNT-KSMNLKLPK-----KCKSMSIV---SGK-----
-----PSDISFT--IDG---DPVKT--KDAPEKFLGGYITFLSATK---ETYDILAKTI---ETTVENINKSA-IRNEYKLRVYM
EYAFPSWRYMLMV-----HDLTDTQLQK-----LDSHTKA-----IKTWLRM
>R4-4_Sra
NWKCPGENG-IPIFLIKKLPS-----AKTFVKKWMKGVVEN--RIPITEYDI-KGNAYAIFKKG---DKNIESNYRFINALNSHYKLL
MKYLNKCVREWCNSN---ISDNQ-FSGKQGYDGALDIGIT---NRLIQ---EM-----GQFAQGWDYMQKAYDSVDHSRL
KMIINSVKEIPKPIRNLCKLPKMYKFSVNVCSPNRDENGKIIKE-----KKKSWITMKRGIYQGCSLAPWFLCLCLAPLQWKMKQ
IIDPIDL-----YGQKKIDILLFMDDIKGFGKNKNELDKITNLIINY-KEIGLTINKD-----KTEYS-----
-----IPDEEKIIQYKYMGVYENKKTACDE--INAEQLLMKL---DEKMDKIFNSK-LNVKNIKAIN
GCVIPTCTYLFSSH-----EFS-DEERIQ-----LARNVDIR-----IRSYMNT

```

## B

| Conservation:          |   | 14649373               | 411          | 132                | 21                    |     | 12 | 322 | 22 | 1 | 1 |
|------------------------|---|------------------------|--------------|--------------------|-----------------------|-----|----|-----|----|---|---|
| 6ar1_chainD_p001       | 1 | ALLERILARDNLTALKRVEANQ | GAPGIDG-VST  | QDLRDYIR-----      | AHWSTIHAQLLAG---      | TYR | 57 |     |    |   |   |
| SLACS                  | 1 | -----                  | RGAPGLDG-WT  | RELLYPLTD---       | PALKMIEIAAVVKDIINADVS | MEV | 44 |     |    |   |   |
| CRE1                   | 1 | -----                  | RGTAPGLDG-WT | RELLPLAEDPALLHEITS | VSVSDIMQGKVA---       | EVV | 44 |     |    |   |   |
| CRE2                   | 1 | -----                  | RAAAPGLDG-WT | RELLVPITED---      | KGLLTELTAIVQDMLVG---  | NVH | 41 |     |    |   |   |
| GAU97528_Ramazzottius_ | 1 | -----                  | VDSAAGPDR-VL | VRVIKQEAUME---     | VLAVIAAVLLEMNATKE---  | HPL | 42 |     |    |   |   |
| Blag_1                 | 1 | -----                  | ADTAPGPDH-VL | VRALKDATC-----     | YEIIAKIATTMLQH---     | SFV | 37 |     |    |   |   |
| Blag_5                 | 1 | -----                  | VDTAPGPDH-VL | MVRVKDDAA---       | TGVLSLLATRLMRT---     | GHV | 37 |     |    |   |   |
| Blag_2                 | 1 | -----                  | VDTAPGPDH-VL | VRVIRNEIV-----     | YEILAIATRLMSS---      | GIV | 37 |     |    |   |   |
| Blag_4                 | 1 | -----                  | TDSAPGPDH-IL | VRTLKLTEC-----     | SPVIAVILKIMLQW---     | GMV | 37 |     |    |   |   |
| Blag_3                 | 1 | -----                  | IDTSAGIDH-VL | VRTIKELKT-----     | SKLLCLLTNAMLKF---     | KIC | 37 |     |    |   |   |
| Blag_6                 | 1 | -----                  | LDTAPGPDH-VL | FKVVKELC-----      | MKIISIIANIMLSW---     | NYV | 37 |     |    |   |   |
| R2_PS                  | 1 | -----                  | SKTAKGVDG-VG | LEELKRVPR-----     | RTLFNINLGLW---        | THV | 34 |     |    |   |   |
| RaR2                   | 1 | -----                  | NNTAAGPDG-IQ | PKSWNRISL-----     | KYKTLIYNLLLYY---      | EKV | 36 |     |    |   |   |
| R8HmA                  | 1 | -----                  | KDSASGPDG-LL | LQDVRRLLGP-----    | LLLCNIFNMWYL---       | HGI | 35 |     |    |   |   |
| R8HmB                  | 1 | -----                  | KDASGPDG-LL  | LQDVKKASP-----     | RQLCIFNMWYL---        | HGI | 35 |     |    |   |   |
| R24_MR                 | 1 | -----                  | KQSASGPDK-IT | RDDLKANKL-----     | ADVVGLLNIVFGL---      | CRT | 36 |     |    |   |   |
| R21_MR                 | 1 | -----                  | KESAPGIDG-IT | REHLRSMR-----      | PDLYALNIIWGM---       | KCL | 36 |     |    |   |   |
| R2SmA                  | 1 | -----                  | HGTAGGIDR-LT | SYDLMRFGK-----     | NGLAGYLNMLLAL---      | AYL | 36 |     |    |   |   |
| R2NS1_CSi              | 1 | -----                  | GNSSPGLDK-LT | PRMLRRFNA-----     | NVLAGYFNLLLLS---      | GGC | 36 |     |    |   |   |
| R2CiB                  | 1 | -----                  | TPSAPGPDK-LT | LDGVKRIPI-----     | AELVSHYNLWLYA---      | GYQ | 36 |     |    |   |   |
| R2NvecA                | 1 | -----                  | KKSASGPDG-VP | CAALQTMGA-----     | ASLAHPNLWLLA---       | GTQ | 36 |     |    |   |   |

|               |   |                                             |                    |      |    |
|---------------|---|---------------------------------------------|--------------------|------|----|
| R21_MDe       | 1 | -----ADSAAGPDG-ITVVNWIGMDI-----             | RLRLFLFLNMIMKR--   | GRL  | 36 |
| R2A_NVi       | 1 | -----KRTAAGPDG-MTTAWNSIDE-----              | CKSLFNMMIMYH--     | QQC  | 35 |
| R21_TCAs      | 1 | -----QISAPGSDQ-IPVAAVKTMSE-----             | LELAILEFNIIILFR--  | NVQ  | 36 |
| R2LcA         | 1 | -----SSTAPGVGDG-FSAKQLRSMSP-----            | RVLNKLNLNLLLLS--   | ENL  | 36 |
| R2Ll          | 1 | -----PSTAPGVGDG-FSAKQLRSMTP-----            | RVLNKLNLNLLLLC--   | ENL  | 36 |
| R2La          | 1 | -----SSTSPGPDG-VTARMLRSIPA-----             | RVLNKLNLNLLLLFI--  | EDL  | 36 |
| R2LcB         | 1 | -----TSTSPGPDG-VTARMLRSIPA-----             | RVLNKLNLNLLLLFI--  | EDL  | 36 |
| R2NS1_SMed    | 1 | -----LKTSSGPDN-ISTEVLEIIPV-----             | LVLVKLFNLIILL--    | SHL  | 36 |
| R21_PPap      | 1 | -----PGSAAIDR-ISVQQFORCPV-----              | HVRVLLFNVLVLLV--   | GHL  | 36 |
| R22_TCAs      | 1 | -----NGAAPGPDG-IAVSVWNKLPP-----             | EAALLFNVLVLLG--    | RCL  | 36 |
| R21_PBa       | 1 | -----NGTAPGLDG-ITPRAWNAVVP-----             | GLRALVFNLLLLLA--   | ETA  | 36 |
| R28_MR        | 1 | -----PQSAPGPDG-IGVRQWRAVPP-----             | SVRALLYNIIVLAT--   | GGF  | 36 |
| R27_MR        | 1 | -----LDTAVGPDG-VTARQWRAVLP-----             | AVRALLYNIILKR--    | GSF  | 36 |
| R21_IS        | 1 | -----VNSAAGPDG-FSARLLKSVPA-----             | LLLRVMVNLVLLV--    | RRV  | 36 |
| R21_RMl       | 1 | -----SSSAAAGPDG-FAARELRKVPP-----            | VILQVLLNLLLLLL--   | KRL  | 36 |
| R2_FA         | 1 | -----MTTSPGPDG-ITVRQLYLVP-----              | QLLVRIINLMLMAC--   | GKM  | 36 |
| R25_MR        | 1 | -----MTTAPGPDG-LTARQIRAVPL-----             | EVLVRIFNIFLVC--    | GRL  | 36 |
| R2_Dan        | 1 | -----LSSSPGPDG-ITPKTARSVPE-----             | GIMLRIMNLILWC--    | GNL  | 36 |
| R2_DSi        | 1 | -----LSSSPGPDG-ITPKSAREVPS-----             | GIMLRIMNLILWC--    | GNL  | 36 |
| R2B_DM        | 1 | -----LTSSPGPDG-ITSQTARSIP-----              | GIMLRIVNLILWC--    | GDL  | 36 |
| R2_DPe        | 1 | -----LTKSPGPDG-ITPRTVRSIPS-----             | GVMLRIMNLILWC--    | GKL  | 36 |
| R2_BM         | 1 | -----WRTSPGPDG-IRSGQWRAVPP-----             | HLKAEMFNAMMAR--    | GEI  | 36 |
| R2C_NGi       | 1 | -----QNTAAGIDG-LTVGDLKGVSR-----             | EMLARIFNLFMWC--    | GKL  | 36 |
| R2_AM         | 1 | -----SSGATGPDG-FSVRSCLKCTPS-----            | RVLAKVFNLFLL--     | EKL  | 36 |
| R2CiD         | 1 | -----VASAGPDG-VSVSGMTKIGA-----              | RVLCMLFNVLVQFT--   | GRT  | 36 |
| R21_BTe       | 1 | -----KKAAGPDG-LQRDHLTIPIGL-----             | PIIMAKIYNILVYC--   | SYF  | 37 |
| R22_MR        | 1 | -----PKSAAAGPDG-LMKRDVIGKSH-----            | LYILYPMFNLIIVAA--  | GRQ  | 37 |
| R2_KF         | 1 | -----KDYAPGPDG-VTKLKVQSMGA-----             | YPSLLAKVYNLVMLT--  | GYF  | 38 |
| R2B_NVi       | 1 | -----NDSAAGPDG-VTKDDLGRGV-----              | SIALSKLFNSILLA--   | GYI  | 37 |
| R2Amel        | 1 | -----SDTAAGADQ-IKKFHLRKKGA-----             | LHVFAKLCNLLMLH--   | RIY  | 37 |
| R2_Rm_ribo    | 1 | -----NASAPGPDG-VKKCHVATRAK-----             | QAVLSALFNLTLLT--   | GIL  | 37 |
| R2_Bg_ribo    | 1 | -----STTAPGPDG-INIQAVRSAPA-----             | QAVLSTFYSLILLL--   | GRP  | 37 |
| R2_RU         | 1 | -----PSSAPGLDG-VGKIHLVGKGI-----             | TLVLAKLYNLLFLT--   | GGY  | 37 |
| R2_RL         | 1 | -----PSSAPGLDG-VRKIHLVGKGI-----             | TLVLAKLYNLLFLT--   | GGY  | 37 |
| R2Dr          | 1 | -----NASTPGPDG-VGKRDISNWD-----              | ECETLTQLFNMMWFT--  | GVI  | 38 |
| R21_GA        | 1 | -----NRSSPGPDG-ITKVALSKWD-----              | EGIKLAHMYSTWLVS--  | AGI  | 38 |
| R21_SSa       | 1 | -----NNTAAGPDG-ITKPALLEWD-----              | TGAKLAAIFSIWLT--   | GTL  | 38 |
| R20IA         | 1 | -----NGTAPGPDG-ISKALLDWD-----               | RGEQLARLYTTWLIG--  | GVI  | 38 |
| R21_Gav       | 1 | -----SKSAPGPDG-LTLRDLRRAD-----              | EGDALAELFSLWLIT--  | GTV  | 38 |
| R21_ZA        | 1 | -----KGSAPGPDG-IALGDIKKMD-----              | GYSRTAELFNWLTA--   | GDI  | 38 |
| R21_TG        | 1 | -----KGSAPGPDG-ITLGDVVKMD-----              | EFSTRTEIFNLWLT--   | GKI  | 38 |
| R21_GFo       | 1 | -----KGSAPGPDG-IALGDIRKMD-----              | EYTRTAELFNWLTS--   | GEI  | 38 |
| R2NS1_CGi     | 1 | -----KDSAAGPDE-IELKTVMAKD-----              | KGXILVNLFNNSFLYR-- | KKV  | 38 |
| NeSL1_TV      | 1 | -----HLSAHGLDG-IPNSVYMLFPVS-----            | AAKFLSILFRSIIIS--  | GHI  | 39 |
| Utopial_ACa   | 1 | -----NGSAPGIDG-IPYEAYKRTKL-----             | DATLAHVFEVVRNLN--  | ARL  | 37 |
| Utopial_LV    | 1 | -----TNSAPGKDR-LEYRHIRRAD-----              | SFSISEAIFNKCLAE--  | GRI  | 38 |
| Utopial_CF1   | 1 | -----TNSAPGPDG-ITYRDLRGAD-----              | GARLLAALFNACVRL--  | EAV  | 38 |
| Utopial_AEc   | 1 | -----NNSAPGPDG-VSYRDLRGADR-----             | GARLLTALYNICLRL--  | EAV  | 38 |
| Utopial_CMy   | 1 | -----KNTAPGKDG-IPYSLKKRDP-----              | GCLVLATLFPNQCKRF-- | CRT  | 38 |
| UtopialB_CPB  | 1 | -----KNTAPGKDG-IRYHLLKKRDP-----             | GCLVLAALFTKCKQF--  | HRV  | 38 |
| Utopial_ENe   | 1 | -----LRSAPGPDG-IRFSVYKQFADV-----            | LIPAMSAIYNACSKH--  | RQV  | 39 |
| R52_SM        | 1 | -----DNTSPGIDG-IQYKDLALLD-----              | EGILLSFLFNKIISS--  | KII  | 38 |
| R5            | 1 | -----SKSAAGLDW-ITYEDIKLGDP-----             | SGEILQPIFEYIVQN--  | NIC  | 38 |
| R51_SM        | 1 | -----THSAPGSDK-ITFSDWRRLD-----              | DFEFLAALFNNILRT--  | GKS  | 38 |
| LIN9_SM       | 1 | -----TDSAPGEDN-IPLRQWIIWN-----              | DGVLPDMFNKIKRT--   | HDI  | 37 |
| R4_Hme1       | 1 | -----NWKAPGTDN-IHNYWYKLTCT-----             | HSLLLKHIHQFTQSP--  | CTL  | 39 |
| R42_AS        | 1 | -----PFKAAGPDG-IHAYWWKHLPS-----             | AGKLLGNIIVEVLVT--  | GKV  | 38 |
| R4_AL         | 1 | -----PWKAPGPDG-LHAHWWKALPS-----             | AKRLLGELVDVWLTT--  | GKV  | 38 |
| R45_BX        | 1 | -----PNKAAGPDG-LPGCVWKCLPNA-----            | SNWLCTWLKKLKACS--  | RIDT | 40 |
| HERO1_BF      | 1 | -----AGSAPGPNP-VSYQIYKKCPK-----             | VVRLWKLFVRVAKK--   | QCI  | 38 |
| HEROTn        | 1 | -----NNSAPGPNP-VPYLVIYKRCPK-----            | LLARLWKILRVIVRR--  | GKV  | 38 |
| HERO1_HP      | 1 | -----NNSAPGQNG-IPYKMYKKCP-----              | LLKIWKMLLDVWRT--   | KYI  | 38 |
| HERO1_SR      | 1 | -----AKATPCPLDQISVIALKRCPI-----             | LRTYLHKLIVKCNNA--  | GTI  | 39 |
| HERO3_BF      | 1 | -----ATSAPGPDG-IMYGHLKHLPA-----             | CHLFLSTLFSKLLS--   | GDP  | 38 |
| R44_SRa       | 1 | -----NWKCPGENG-IPIFLIKKLPS-----             | AKTFVKKWMKGVVEN--  | RPI  | 39 |
| Consensus_aa: |   | .....sAsG.D...l...h..hs.....h..lhp.hh.....h |                    |      |    |
| Consensus_ss: |   | hhhhhhhhhh                                  | hhhhhhhhhhhhhh     |      |    |

|                       |    |        |                   |              |                              |               |            |      |
|-----------------------|----|--------|-------------------|--------------|------------------------------|---------------|------------|------|
| Conservation:         | 5  | 22     | 2244363911        | 11           | 1323396734242117242234213411 | 11            | 5          | 3531 |
| 6arl_chainD_p001      | 58 | PA---- | PVRRVEIPKPG-----  | GGTRQLGIP    | TVDRLIQQAILQELTP             | IFDP----      | DFSSSSFGFR | 110  |
| SLACS                 | 45 | GRRLQ- | ATSLTVLRKPN-----  | GKYRPIGAES   | VWAKLASHIAISR                | VMKTAEEK----- | FSGIQ-FGVG | 100  |
| CRE1                  | 45 | ARRLR- | SSAVTPIPKDE-----  | AGTKIRPI     | VPESAWLKLASLVAMAE            | IPSSFKET----  | FKGWQ-YGVW | 102  |
| CRE2                  | 42 | PSFAT- | RIRACILHPPFR----- | KEAGSAKVR    | PITPESALMKLAHIALDS           | VEKSFSTR----- | FKGWQ-YGVW | 102  |
| GAU97528_Ramazzottius | 43 | PSVLQ- | LALTVLIHKGG----   | DVTDGNNYRPI  | SICSARRRVLERVVDRH            | LRRYGS-----   | VSRFR-QGFT | 101  |
| Blag_1                | 38 | PECLQ- | KARTVLIYKGG-----  | DDKDLGNWR    | PITICSVVRRRIERILDA           | RLRALVN-----  | LCENQ-RGFT | 96   |
| Blag_2                | 38 | PPCLL- | IARSILHKSG-----   | DVNDITNYRPI  | TICSVVRRVIERTLDRRL           | KEYVS-----    | FNRHQ-RGFT | 96   |
| Blag_2                | 38 | PRCFK- | TARTVLIHKAA-----  | DVNILSNWRPI  | TICSVLRRVIERVLDKHL           | RTFVS-----    | FNEHQ-RGFT | 96   |
| Blag_4                | 38 | PDRMR- | GARTILIYKKG-----  | ERCSVSSWRP   | ISVCSVIRRLIERALDS            | VLRLQYLT----- | LNNNQ-RGFV | 97   |
| Blag_3                | 38 | PGILK- | TARTVLLFKGG-----  | DETKLSNWRP   | SIFSVCIRIIEKVINRLK           | SYIE-----     | LSPHQ-RGFI | 96   |
| Blag_6                | 38 | PNSFQ- | SGRTILIFKSG-----  | DPNSLKNWRPI  | TIFSILRRIIERALERK            | IRPFVE-----   | LSTCQ-RGFI | 96   |
| R2_PS                 | 35 | PESLY- | KGRITLIPKKS-----  | LPELAGDFRP   | ICVLPVVVRLHLRILAK            | RLAIVQ-----   | HTEFQ-AGFQ | 92   |
| RaR2                  | 37 | PHKLK- | VSRVFIPIKKKD----- | GSSDPGEFRPLT | ICSVVLGRGNKILVQRL            | LVSLYK-----   | YDERQ-TAYL | 96   |
| R8HmA                 | 36 | PVEEN- | RCRITILYKSG-----  | DRHLASNYRPV  | TIGNMLNRLYAKIWDK             | RIRKNVR-----  | LHVRQ-KAFI | 94   |
| R8HmB                 | 36 | PVVEN- | RCRTILLHKGG-----  | EKHLTSNYRPV  | TIGNMLNRVYAKIWDK             | RIRKNLQ-----  | LHVRQ-KAFV | 94   |
| R24_MR                | 37 | PTLLR- | HNRTVLIPIKKG----- | DLSLTSNWRP   | ITVSSIFSRLHLKILAS            | RLSNNIK-----  | LHHAQ-RGFT | 95   |
| R21_MR                | 37 | PVLR-  | SNRTSLIPKSG-----  | NTRCLKWRP    | IMVSSRVLRLLNKVIVS            | RLNEIK-----   | LNYSQ-RGFT | 95   |
| R2SmA                 | 37 | PTNLS- | TARVTFVPKSS-----  | SPVSPEDFRPI  | SVAPVATRCLHKILAK             | RWMLFP-----   | QERLQ-FAFL | 95   |
| R2NS1_CSi             | 37 | PHLC-  | RARITLVPKVP-----  | NPTSPDQLRPI  | SVSSILVRCFHKVLADR            | WSRRLQ-----   | LPSLQ-FAFL | 95   |
| R2CiB                 | 37 | PEGLR- | EGITTLIPKIK-----  | GTRDPAKLRPIT | VSSSFCIRIFHRCCLAQ            | RMETSLP-----  | LGERQ-KAFR | 95   |
| R2NvecA               | 37 | PKRLT- | ECRTIFVPKEV-----  | NTHLPLHHRPIT | IGSVVVRFLHQILGK              | PMEAVLP-----  | LGSQ-RGFR  | 95   |



R21\_MDe  
R2A\_NVi  
R21\_TCAs  
R2LcA  
R2Ll  
R2La  
R2LcB  
R2NS1\_SMed  
R21\_PPap  
R22\_TCAs  
R21\_PBa  
R28\_MR  
R27\_MR  
R21\_IS  
R21\_RM1  
R2\_FA  
R25\_MR  
R2\_Dan  
R2\_DSi  
R2B\_DM  
R2\_DPe  
R2\_BM  
R2C\_NGi  
R2\_AM  
R2CiD  
R21\_BTe  
R22\_MR  
R2\_KF  
R2B\_NVi  
R2Amel  
R2\_Rm\_ribo  
R2\_Bg\_ribo  
R2\_RU  
R2L  
R2Dr  
R21\_GA  
R21\_SSa  
R201A  
R21\_Gav  
R21\_ZA  
R21\_TG  
R21\_GFo  
R2NS1\_CGi  
NeSL1\_TV  
Utopial\_ACa  
Utopial\_LV  
Utopial\_CFl  
Utopial\_AeC  
Utopial\_CMy  
UtopialB\_CPB  
Utopial\_ENe  
R52\_SM  
R5  
R51\_SM  
LIN9\_SM  
R4\_Hmel  
R42\_AS  
R4\_AL  
R45\_BX  
HERO1\_BF  
HEROTn  
HERO1\_SP  
HERO1\_HR  
HERO3\_BF  
R44\_SRa  
Consensus\_aa:  
Consensus\_ss:

37 DDDLK-SARTVLI PKGK---GNIRPEN TRPLSITSVVLRHLHLKILAKRLKSLQT-----FSDSQ-KAFI 95  
36 PRRYL-DSRTVLI PKEP---GTMDPACFRPLS IASVALRHFRHILANRIGEHGL-----LDTRQ-RAFI 94  
37 PSAWG-VLRITVL PKDG---DLRNPANWRPITISSALQRLHLHRVLAARLSKLVS-----LSSSQ-RGFT 95  
37 PNSFK-MHKTVLIPKID---DPKSPGDFRPIITISPVLARLNLNKILAAARLSKLVP-----ISQRQ-KAFL 95  
37 PNSFK-MHKTVLIPKIV---DPKSPGDFRPIITISPVLARHLNLKILAAARLSKLVP-----ISQRQ-KAFL 95  
37 PAVFK-CHRTVLIPKID---NPTSPGEFRPITISSIVVRQLNKIIAARVSEGV-----INPRQ-KAFR 95  
37 PAVFK-CHRTVLIPKVD---NPALPGEFRPITISSIIVRQLNKIIAARVSEGV-----INPRQ-KAFR 95  
37 PSEFK-NSRTTILPKVE---TPKDPGYRPI SVSSVFVRALNKILASRVSNNGK-----GAHAQ-KGFK 95  
37 PGRMS-CARTVFLPKVE---GSSDPKDYRPI SITSVITRQPHKILAAARLTSMHA-----WDERQ-AGFL 95  
37 PAELT-RTRTVFI PKTD---APRTPADYRPI S IASVVARHFRHVL SARVQRIPDLF---TKYQR-GFLS 97  
37 PLSIT-TTRTVFLEKGGM-SDRPGPSEYRPLS IGSVIRHLHLKILAKRLAALDI-----FDARQ-RGFR 97  
37 SPALL-TSRTVVFV PKKSG---DPDSPG DYRPI SVVVRQLHLKILANRLRASGL-----VDL-RQRC 94  
37 PASML-ESRTVFLPKKQ---HSVNPADFRPI S IASVVRQLHLKILAMRLRRTNL-----VDE-RQRC 93  
37 PAALR-DARTTFI PKVP---DAVDPQFRPITVASVLQRLHLHLKILAKRLAALDI-----LNFARQ-RAFQ 95  
37 PLFLT-QARTIFI PKVP---GASTASQHRPI S ISHVLLRLLHLKILYFRLLADLD-----LDLQ-RAFL 95  
37 PDSFL-ESKTTLI PKKP---NSTEPGDFRPI TVQSVLVRQLNKILAAARVAQHIP-----LDERQ-RGFR 95  
37 PKHLL-ESRTILIPKKD---NASEPGDFRPIITISVMTRTYHKVIARRFAGSIE-----LDKRQ-KAFX 95  
37 PYSIR-LARTIFI PKKA---TANQPQDYRPI SVSPSVVRQLNAILASRLSAIN-----WDTRQ-RGFL 95  
37 PHSIR-LARTVFI PKTV---TAKRPQDFRPI SVSPSVLVRQLNAILATRLNSIN-----WDPRQ-RGFL 95  
37 PVPFR-MARTIFI PKTV---RANRPQDFRPI SVSPSVVRQLNAILASRLTAAVS-----WDPRQ-RGFL 95  
37 PVSIR-QARTIFI PKVP---NASRPQDFRPI TVQSVMVRLNAILASRLTSSVD-----WDPRQ-RGFL 95  
37 EILLR-CRTVVFV PKVE---RPGGPGEYRPI S IASILPLRHFSILARLLACCP-----PDARQ-RGFI 95  
37 PEHLR-ASRTILL PKKP---GAKVPGEFRPI TVTTSVLIRTFHKVLAERLKVVP-----LDPRQ-RGFR 94  
37 PAFML-TSRTVVL PKVP---EPKAPT DYRPI SVSSTVLRLFKHLARLLTASG-----LDLRQ-RGFI 95  
37 PRWTK-ENRTTILIAKSA---AAEDVGDWRPI ITIGSHVVRLYAKLLSRLRGSCVQ-----LNLQ-RAFR 96  
37 PSAWK-ENRTTILIPKINK---PCSLVENWRPITISPIGRIFSSIIDGRIRRGTV-----LNMQR-KGFT 97  
37 PDARW-KNITKLLNKEGK---DPSLPGSYRPI ITISPLFSRIFWGILDQQLRLIRIN-----ITPRQ-KGFI 97  
37 SSCWK-EHKTSLIPKDRG---SPMDVSNWRPITIGSLLSRIYTGILERRLRITVSD-----IHQRQ-VGFM 98  
37 KAWR-ENRTTILPKPEK---DPADVKNWRPITISSMVSRYVSGLLDQVRVAVIK-----QCDRQ-KGFT 97  
37 PAQWK-TNRTTILIPKPKG---SAEEVENWRPITIGSLLGRIYSAMIDRLKRSKIK-----QHIRQ-KGFT 97  
37 PAEWS-TNRTTILPKKEG---DASLLANWRPLTIGSLVSRIFWGCVDTRMRVRV-----LTPRQ-KGFI 97  
37 PAARW-ENRSVLIPKEGY---DVLISNYRPLTIGSILSRIFWGIIDRLRELLK-----IHRYQ-KGFT 97  
37 PECWK-RNRTVFI PKIGK---DLSEVGWRPLTIGSLLARMYSAFLERRIRRVTS-----LSSSQ-RGFT 97  
37 PECWK-RNRTVFI PKIGK---DLSEVGWRPLTIGSLLARMYSAFLERRIRRVTS-----LSSSQ-RGFT 97  
37 SRLK-KSRTVLLPKSSDPGAEMEIGNWRPITIGSMVLRLFTRVINTRLTEACP-----LHPRQ-RGFR 100  
37 PKVFK-KCRTTILIPKTDGVS LHGDVVGQWRPI ITIASVLRLYSRILTERMTVACP-----SHPRQ-RGFI 100  
37 GPFK-KCRTTILIPKTDGVS LHGDVVGQWRPI ITIASVLRLYSRILTERMTVACP-----SHPRQ-RGFI 100  
37 PRVFK-ECRTKLLPKSSDPVLELDIGGWRPITIGSMVTRLFSRILTMRLTRACP-----INPRQ-RGFI 101  
37 PDGLK-ECRSVLIPKTVDRKLGQGNWRPITIGSIVLRLFSRVLTARLAAACP-----INPRQ-RGFI 100  
37 DMVR-GCRTVLIPIKSTTPERLKDINNWRPITIGSILLRLFSRIITARMTKACP-----LNPRQ-RGFI 100  
37 DMVR-GCRTVLIPIKSSKPRDLKDINNWRPITIGSILLRLFSRIITARLTKACP-----LNPRQ-RGFI 100  
37 DMVR-GCRTVLIPIKSSKPRDLKDINNWRPITIGSILLRLFSRIITARLTKACP-----LNPRQ-RSFI 100  
37 EIFK-GNRSILLPKGND---GLEDVNNWRPLTIGSVLRLYTSLARVLDSCA-----LNPRQ-RGLI 98  
37 PDCWK-LSKTVMLFKKD---DPSLAKNWRPIGITSCTYRIFMTLVNKLQMPIPM-----PHAMQ-KGFV 98  
37 PARWD-VARTVLLYKKG---DPNDTGNWRPISLQVTIYKIFTAALSKRLISWAGKHNT---FASAQ-KGFL 100  
37 PAPWK-TASTILLHKAG---PTDDPANFRPIALQSCLYKLFMAVLADRLTKWACENQY---LSPEQ-KSAR 101  
37 PASWK-TSNTVLLVYKKG---DRDSLENWRPLALGDTAPKLFALADRLTDMTEWAVTNNK---LCPAQ-KGFL 101  
37 PASWK-TSNTVLIHKKG---DRGMLENWRPLALGDTVPKLFALADRLTDMTEWAVTNNK---LCPAQ-KGFL 101  
37 PSSWK-KAMTVLVYKKG---ERDDPSNWRPISLCSITMYKLYASCLASRI TEWSVSGGA---LTSIQ-KGFM 101  
37 PRSWK-KSMTVLIHKKG---ERDDPGNWRPISLCSITMYKLYASCLASRI TEWSVSGGA---LTSIQ-KGFM 101  
37 PRKWK-ESVTVLIPKGG---DPKSVKNWRPILNQCIDIYKLYAALWAQKIAAWAKSGV---ASKSQ-KGFM 102  
37 PWSWK-TFKTILIPKPKDPTDN YDKVSSWRPIALLSVIYKVFASILTRLTSTNNDI---LHIGQ-KGGS 104  
37 PSEK-ASRTIMIPKPKG---SDYSDPSSWRPITISAVYRLLMKYL TWELYNWILLNQ---LSRSQ-KSLG 103  
37 PNKWK-TFRTKLIIKPKGEHSPHEVSSWRPILALDITAYRFFATILNRLLSWIAKRLN---LCSNQ-KAVG 104  
37 PDMWK-NYTTTILLHKAG---DNDPANFRPIALQSCLYKLFMAVLADRLTKWACENQY---LSPEQ-KSAR 101  
37 PLFIT-NGITYMLPKGL---DPTNPANYRPIITCLQTIYKIITACITDI IYKHIDQNNI---LAEQQ-KGCR 102  
37 SCRWMRGRTVLLPKKG---DLRLPQNYRPIITCLNTCYKLLTATIAKALLRHLDKGEA---IPQQ-RAIR 102  
37 TTGWMCRGRTTILIPKKG---DRGDPNRYRPIITCLNTCYKLVTSVMNSVILSHSRGEA---LPMNQ-RAMR 102  
37 PRWLS-EGRVVLLMKKG---DPNDPANRYPIITCLNTCYKLVTSVMNSVILSHSRGEA---LPMNQ-RAMR 102  
37 PSARW-RAGGVLI PKEK---VSTDIKQFRNISLLNVEGKLFSSILTCKRMITYLLANNYIDTEVQK-AGVP 103  
37 AHQWR-WAEGVWVPKEE---KSTLIEQFRITISLLNVEGKLFSSILTCKRMITYLLANNYIDTEVQK-AGVP 103  
37 PVQWR-VAEGVYIPKSAIT-PNEKITITDFRPIALNVEAKMFPAIPAKRLETYMRKNGVLTITVQK-GGVG 105  
37 PLCWR-KALTILIHKKG---DANDPANFRPIITCLQVLYKIFSTLKNRHLNFI LQNNFISTNIQ-KGYF 104  
37 PTSWS-SGNVSLIHKDG---SPEAAENFRMICTLSCVSKIFHQILSERWAKYMTCNLD-IDPETQKAFIT 103  
37 TEYDI-KGNAYAI PKKG---DKNIESNYRFINALNSHYKLLMKLVKCVREWCNLD-IDPETQKAFIT 103  
P..hp..sphhhll.K....p.p...p@RPIs1.shh..hh..hspcl1..h.....h...Q..th.  
hhh eeeee hhhhhhhhhhhhhhhhhhhhh

Conservation: 2541252 34 11241 22 1 12121331493358763524 25 24 21

6arl\_chainD\_p001 111 PGRNAHDAVRQA---QGYIQ-----EGYRYVVDMDLEKFFDRVNHDIILMSRVARKVK 159  
SLACS 101 G-----HIE---EAIK---IRKDF-----ATKGSALMDGRNAYNAISRAALEAVYGDST 146  
CRE1 103 G-----DVA---KAVAK---IRRDS-----EEHEYLVALDGVNAYNTMSRAHILQAVYAEQR 148  
CRE2 103 G-----DSTE---VKIR---EAYAE-----ASSDVLVALDATNAYNRMSRRHILEAAYQPE 150  
GAU97528\_Ramazottius\_ 102 SAPGTHVNASIL---GSVSK---KAQAE-----QSTVVVVLIDIKQAFEGILHVHLKDLTLRASPL 155  
Blag\_1 97 NSPGTLINTSIL---ESILV---AAKSK-----KKDCTIVFLDISKAFDNVGHNLQNSLSALRI 150  
Blag\_5 97 SSPGTLMTSLL---RSILT---SAKTK-----KCNATLVFLDIRKAFDNVGHNLQNSLSALRI 150  
Blag\_2 97 NNSGTLINTSIL---RKVLK---TKDN-----KEDVTVFLDISKAFDNVGHNLQNSLSALRI 150  
Blag\_4 98 SQLGTSINTSLV---DGCLK---KAKLE-----QRNVSVIMLDVAQAFDSVGLDHLEKCLDSQFL 151  
Blag\_3 97 NVPGTHINTSII---NGCLT---RAKKE-----KRNCCTIAFLDISKAYDNVGHHEHVKRCLLRTNM 150  
Blag\_6 97 STPGTTFNSSLI---NSCLQ---KSKE-----KGCCTITFLVDISKAFDSVGHNLQNSLSALRI 150  
R2\_PS 93 SGRSTSENIFLL---RTILE---SLPAG-----KESMYIALLDLFRKAFDSVNHVTLVCGLLRDLGL 146  
RaR2 97 PIDGVGNTIHVL---AAILN---DSNTK-----LSELHVALLDITKAFNRLHHTSIKISLVGKGF 150  
R8HmA 95 PVDGCFENVKTI---CQVLQ---SYRRK-----KLEHNVVFLIDAKAFDPTVLHDSIRKALWRKGV 148  
R8HmB 95 PLDGCFFENVKTI---QCILQ---SYRRS-----RREHNVVFLIDAKAFDPTVLHDSIRKALWRKGV 148  
R24\_MR 96 PCDGIMSSSTIL---DAIVR---EHRTN-----GKPLYVLSIDLTKAFDKIHPAIIENSINKGV 149  
R21\_MR 96 KIDGVMANNTIL---QTAIR---TMRNS-----SKPFIISIDLAKAFDRVSIVSIIDALWRRGV 149  
R2SmA 96 NRDCGCEAVNLL---HSVIR---HVHTR-----HAGASFALLDISRAFDTVSHDSIRAAKRYGA 149  
R2NS1\_CSi 96 HRDGCLEATSLL---HALLR---HSSAT-----ASNLSLAFVDISKAFDSVSHDTIVRSAAEFGA 149  
R2CiB 96 KVDGICHNIWSL---RSLIH---NSKDN-----LKELNITFLDVRKAFDSISHKSGIAAARLGL 149  
R2NvecA 96 KGDGICQNIWLL---HTLIR---RSTD L-----LRPLKLVFLDVKKAFDSVSHESLLIAAKRLGV 149

|            |     |               |              |            |       |            |       |       |       |        |         |        |        |     |
|------------|-----|---------------|--------------|------------|-------|------------|-------|-------|-------|--------|---------|--------|--------|-----|
| R21_Mde    | 96  | DCDGTQENLAIL  | ---NTLLT---- | DARKN----- | LKS   | THIATLTLDR | KA    | FDSVS | HKTI  | IDSIT  | GMGC    | 149    |        |     |
| R2A_Nvi    | 95  | VADGVAENTSLL  | ---SAMK---   | EARMK----- | IKGLY | IAILL      | DVKK  | A     | FDSVE | HRS    | ILDALRR | KKL    | 148    |     |
| R21_TCas   | 96  | EIDGTLANALIL  | ---HEYLQ---  | YRRQT----- | GRTY  | XVVLVD     | VRKAF | DTVS  | HCSV  | SVALGR | FGI     | 149    |        |     |
| R2LcA      | 96  | PVDGCGENIFLL  | ---DYILR---  | SSKKS----- | SKS   | VAMAVL     | DVKK  | A     | FDSVS | HSH    | ILRALNE | AKC    | 149    |     |
| R2Ll       | 96  | PVXGCGENIFLL  | ---DYILX---  | NSKKK----- | SKSV  | MAVL       | DVKK  | A     | FDSVS | HSH    | ILRALNE | AKC    | 149    |     |
| R2La       | 96  | QIDGCAENVFLL  | ---DFILR---  | DAKTK----- | IKSL  | SLAT       | VDIK  | A     | FDSVS | HSH    | SIFRAIR | GARC   | 149    |     |
| R2LcB      | 96  | QIDGCAENVFLL  | ---DFILR---  | DAKTK----- | IKSL  | SLAT       | VDIK  | A     | FDSVS | HSH    | SIFRAIR | GARC   | 149    |     |
| R2NS1_SMed | 96  | ALDGCLENTVLL  | ---NCILG---  | DAKIN----- | NK    | SIALSF     | LD    | IMKFA | FDSVN | HDS    | ILRAATI | IAGY   | 149    |     |
| R21_PPap   | 96  | PVDGCGENLAIL  | ---NELIR---  | FSRVN----- | RREL  | HLASL      | DIS   | KA    | FDMV  | PPQA   | INSVAQ  | LGA    | 149    |     |
| R22_TCas   | 98  | GVDGIADNLSVL  | ---DTMLT---  | MSRRC----- | CKHL  | HLAAL      | DVSK  | A     | FDTVS | HFAI   | IVRAC   | SIFG   | 151    |     |
| R21_PBa    | 98  | PVDGVCENITVL  | ---SSVLG---  | DARRR----- | CKSL  | HVAC       | VDLS  | KA    | FDTVS | HAAI   | HRTLE   | EELGL  | 151    |     |
| R28_MR     | 95  | FDDGCGENIAAL  | ---AAVIH---  | DSRSH----- | LREL  | HVASL      | DI    | AKA   | FDSVS | HQAI   | ARVLT   | TLGV   | 149    |     |
| R27_MR     | 94  | MDDGCAENITVL  | ---ASLLD---  | DARHG----- | LKE   | HLIVSL     | DCA   | A     | FDSV  | HHA    | IDATL   | KCEGL  | 147    |     |
| R21_IS     | 96  | PVDGCAENIWLL  | ---STALN---  | EARTR----- | RRPL  | HMAS       | VDLT  | KA    | FDRVT | TDAIL  | LRGAR   | RAGL   | 149    |     |
| R21_Rmi    | 96  | PVDGCAENILLL  | ---ATIID---  | EARKS----- | LRPL  | SLASL      | DI    | AKA   | FDRVL | PAI    | LALRR   | KGI    | 149    |     |
| R2_FA      | 96  | PVDGVAHNIFEL  | ---DMILR---  | CHRSE----- | FRDL  | LRASL      | DI    | AKA   | FDS   | INT    | HIEDT   | MEV    | RGF    | 149 |
| R25_MR     | 96  | PVDGCAENIFDL  | ---DMVLR---  | YHRES----- | FKSI  | FMAST      | DVA   | KA    | FDSV  | SHRAMY | DTLR    | SKGV   | 149    |     |
| R2_Dan     | 96  | PTDGCADNTTIV  | ---DLVLR---  | EHHKR----- | FK    | SCYIGT     | LDV   | SKA   | FDAVA | HEAVY  | TNLAS   | YGA    | 149    |     |
| R2_DSi     | 96  | PTDGCADNATIV  | ---DLVLR---  | HSHKH----- | FRSCY | IANL       | DVSKA | FDSLS | HS    | IYD    | TLRAY   | GA     | 149    |     |
| R2B_DM     | 96  | PTDGCADNATIV  | ---DLVLR---  | DHHKR----- | YASCY | IATL       | DVSKA | FDSVA | HDAV  | FNVT   | YTAY    | GA     | 149    |     |
| R2_DPe     | 96  | PTDGCADNTTIV  | ---DLILR---  | DHHKR----- | CKSLY | THATL      | DIS   | A     | FDSV  | SHAAVS | ATLT    | AYGA   | 149    |     |
| R2_BM      | 96  | CADGTLSENSAVL | ---DAVLG---  | DSRKK----- | LRECH | VAVL       | DFA   | KA    | FDTVS | HEAL   | VELL    | LRGM   | 149    |     |
| R2C_Ngi    | 95  | ESDGCENVMML   | ---DMTIR---  | YHHER----- | RRKM  | FLLAL      | DM    | A     | FDSV  | SFESM  | REVL    | TTKGI  | 148    |     |
| R2_AM      | 96  | PVDGCAENLVLL  | ---ESAIR---  | SAKNY----- | KRSL  | FVASM      | DI    | KA    | FDSVA | HEA    | IFEAL   | SKGA   | 149    |     |
| R2Cid      | 97  | DVQGCENVMML   | ---SGMIR---  | DAKAR----- | SRDL  | NLV        | FLDL  | PA    | FDSV  | HSSIV  | KALRR   | QGV    | 150    |     |
| R21_BTe    | 98  | SENGCKINIELL  | ---NSALN---  | YSKR-----  | NSGG  | IPTIV      | D     | ISKV  | FDPV  | HAAL   | KPCL    | AKKGV  | 150    |     |
| R22_MR     | 98  | PEMGCFLNVNLL  | ---NEIIR---  | IAKR-----  | KQGI  | VITQ       | VDIS  | KA    | FDTVP | SFAIL  | NALNA   | KGL    | 150    |     |
| R2_KF      | 99  | PVNGCAANLFI   | ---DECIR---  | QAKK-----  | EGT   | IVGSL      | DI    | KA    | FDTVP | HEA    | ILRAL   | SSQV   | 151    |     |
| R2B_Nvi    | 98  | EENGCFPSNIQLL | ---DDAVS---  | NAK-----   | KAGG  | VITIL      | D     | VS    | KA    | FDPV   | HAVIQ   | GCLE   | KKGI   | 149 |
| R2Amel     | 98  | QEDGCKNNIAIL  | ---SSALT---  | KMKE-----  | DSGG  | IITIL      | D     | ISKAF | FDPV  | HCEI   | ISQ     | LMNKV  | 150    |     |
| R2_Rn_ribo | 98  | AEAGCFNNVLL   | ---DSVLR---  | HAKC-----  | GGGV  | VAVQ       | LD    | IS    | KA    | FDTVP  | PGT     | IATALL | RKGL   | 150 |
| R2_Bg_ribo | 98  | TEPGCYQNVRI   | ---SEVLR---  | QAKS-----  | ARGL  | VAVQ       | LD    | IS    | KA    | FDTVP  | HAAI    | ATVLR  | RQGL   | 150 |
| R2_RU      | 98  | NIQGGCHVNLTL  | ---KEGIR---  | QAKV-----  | KNGG  | VIVSD      | I     | IE    | KA    | FDTIP  | HSVIF   | SR     | LASQGV | 150 |
| R2_RL      | 98  | NIQGGCHVNLTL  | ---KEGIR---  | QAKV-----  | KNGG  | VIVSD      | I     | IE    | KA    | FDTIP  | HSVIF   | SR     | LASQGV | 150 |
| R2Dr       | 101 | RSFGCSENLEVL  | ---ECLLR---  | HSKEK----- | RSQ   | LAVV       | FVD   | FA    | QA    | FDTVS  | HEHML   | SVLE   | QMN    | 154 |
| R21_GA     | 101 | ASPGCSENLMML  | ---EGCMS---  | LSKAG----- | NGSL  | LAVV       | FVD   | FA    | QA    | FDTVS  | HEHML   | SVL    | VQKGL  | 154 |
| R21_SSa    | 101 |               |              |            |       |            |       |       |       |        |         |        |        |     |

|                      |     |                                                                                    |          |
|----------------------|-----|------------------------------------------------------------------------------------|----------|
| R21_MDe              | 150 | PKMFIDYVTDLYLN-----ARTVFQYNG-----SSTFLDIKRGVLQGDPLSPLLFNL                          | 196      |
| R2A_NVi              | 149 | PLEMRNYIMWVYRN-----SKTRLEVVK-----TKGRWIRPARGVRQGDPLSPLLFNC                         | 196      |
| R21_TCAs             | 150 | PSVIREYILATFGA-----QTTIKCGS-----VTRPRIMRLRGVRQGDPLSPVLFNL                          | 196      |
| R2LcA                | 150 | PINFINFVRNSYDG-----CTTKLTCGG-----TSFPDSVRMNRGVKQGDPLSPVLFNL                        | 198      |
| R2Ll                 | 150 | PVNLXNFVRNSYDG-----CTTKLTCGG-----TSSPDSVRMNRGVKQXXPLSPVLFNL                        | 198      |
| R2La                 | 150 | PENLVNYIQNSYSG-----CTTQISVGG-----SISASKIPMNRGVKQGDPLSPVLFNL                        | 198      |
| R2LcB                | 150 | PENLVNYIQNSYSG-----CTTQISVGG-----SISTTKILMNRGVKQGDPLSPVLFNL                        | 198      |
| R2NS1_SMed           | 150 | PKLLLGIKESYNG-----ADTEVEK-----IKATFKRGVQGDPLSPVLFNN                                | 192      |
| R21_PPap             | 150 | PQNLVEYLKGLYAN-----NQTTLEYGG-----SELYCRVKRGVRQGDPLSPLLFNL                          | 196      |
| R22_TCAs             | 152 | -----SAETVLEEG-----GRRHFVQVRXGVRQXDPLSPLLFNL                                       | 185      |
| R21_PBa              | 152 | PREFRDYVRAIYAE-----ARTVLQPTG-----RQRMSPIHVGRGVQGDPLSPLLFNL                         | 200      |
| R28_MR               | 149 | PCELVSYVTTMYAR-----SSTMFEVRG-----QRSELPFVGRGVQGDPLSPILFCL                          | 196      |
| R27_MR               | 148 | PAGFVQYISRTYSYD-----SSTRLEVGR-----NRSEP1KTNRGVRQGDPLSLIFCL                         | 195      |
| R21_IS               | 150 | SGEFIGYLKELYTT-----SRTLLQFQG-----ESLLVEPTTGVVRQGDPLSPILFNL                         | 196      |
| R21_RM1              | 150 | SEDFISYIEDFYQN-----AVTVLTFGG-----KSLVVHPTVGVRQGDPLSPLLFNL                          | 196      |
| R2_FA                | 150 | PKPMINYIMACYRR-----SKTRFTFNG-----WISDTVKPTCGVRQGDPLSPILFNL                         | 197      |
| R25_MR               | 150 | PAPLVEYVRDVER-----STTRLTGSD-----WQSDLIRCGVKQGDPLPPIIFNM                            | 195      |
| R2_Dan               | 150 | PKGFINYLKAYEG-----GGTMLAGNG-----WVSEAFIPARGVKQGDPLSPILFNL                          | 197      |
| R2_DSi               | 150 | PKGFVDYVQNTYEG-----GGTSLNGDG-----WSSEEFVPARGVKQGDPLSPILFNL                         | 197      |
| R2B_DM               | 150 | PKSFVDYVRRWYSG-----GGTYFNGGD-----WRSEEFVPARGVKQGDPLSPVLFNL                         | 197      |
| R2_DPe               | 150 | PKEFVDYVQNSYEV-----CGTTLNGDG-----WRSEEFIPARGVKQGDPLSPILFNL                         | 197      |
| R2_BM                | 150 | PEQFCGYIAHLYDT-----ASTTLAVNN-----EMSSPVKVGKRGVRQGDPLSPILFNV                        | 197      |
| R2C_NGi              | 149 | PTPFIEYFMTHLED-----SFTVLQHG-----WQSGKIHPTCGVKQGDPLSPPIFNF                          | 196      |
| R2_AM                | 150 | PDSFVTYVRNCYDG-----FASVVKLG-----RDTAQTTVRQGVVQGDPLSPILFNL                          | 196      |
| R2CiD                | 151 | PEKFVRIVQDLYDG-----AVTTVSVGG-----RATPQLVVKRGVKQGDPLSPLLFNL                         | 198      |
| R21_BTe              | 151 | PALIVDLIDEMYKN-----VKTTIKTKD-----GGVEIMIRRGVKQGDPLSPLLFNL                          | 197      |
| R22_MR               | 151 | PKVVVQLIMDSYNS-----ISTQIQYQS-----STFDISIKRGVKQGDPLSPILFNI                          | 197      |
| R2_KF                | 152 | DEHTMAHIRMYSYG-----IRTRINGKG-----SDIPLVGRGVKQGDPLSPMLFNM                           | 196      |
| R2B_NVi              | 150 | PETVAAYISSMYRD-----CSTAIRTRS-----GDVKIGMKRGVKQGDPLSPILFNL                          | 196      |
| R2Amel               | 151 | PSPICEYIQKMYIG-----CKTIIYCRD-----KKTLPVILRGVKQGDPLSPLLFNL                          | 198      |
| R2_Rm_ribo           | 151 | PPFLANLVSRAYVG-----QRTHLNVRG-----EKVEVRNPLVIVRGQGDPLSPMLFNL                        | 198      |
| R2_Bg_ribo           | 151 | PPYFADMVRRSYEG-----AYTSIRVRD-----HRIQLELRGVKQGDPLSPILFNM                           | 197      |
| R2_RU                | 151 | PPLLRKIIISNMKYD-----VYTVIEGQ-----CIPIKRGVKQGDPLSPLLFNI                             | 193      |
| R2_LR                | 151 | PPLLRKIIISNMKYD-----VYTVIEGQ-----CIPIKRGVKQGDPLSPLLFNI                             | 193      |
| R2Dr                 | 155 | DPHMVNLIIRIYTN-----SCTSVELGR-----KEGPDIPVRVGKQGDPLSPLLFNL                          | 202      |
| R21_GA               | 155 | DQHMVELIKDSYEN-----SVTKVHCQE-----GCSTD1AMKVGKQGDSPMLFNL                            | 202      |
| R21_SSa              | 155 | DEHIIIGVGDSTDT-----VTTTITVSG-----EQSPPIDMRVGKQGDPLSPMLFNL                          | 202      |
| R2O1A                | 156 | DRHVIGLIRNSYVD-----CVTRVGCVE-----GMTTPIQMKVGKQGDPMSPMLFNL                          | 203      |
| R21_Gav              | 155 | DEHIVNLIEDSYQK-----VTTTRVQFN-----GVTTPPISIKTGKQGDPMSPMLFNI                         | 202      |
| R21_ZA               | 155 | DPHIVGLVNMYKD-----ISTYVTTKK-----NTHTDKIQIRGVKQGDPLSPLLFNL                          | 203      |
| R21_TG               | 155 | DPHIVGLVSNMYEN-----ISTYITTKR-----NTHTDKIQIRGVKQGDPMSPMLFNL                         | 203      |
| R21_GFo              | 155 | DPHIIGLVKNMYKD-----ISTVITTKK-----NTYTDKIQIQGVKQGDPLSPLLFNL                         | 203      |
| R2NS1_CGi            | 153 | PEHFDIVADLYNG-----ASTVFQTD-----GQTGEIPMTRGVKQGDPLSPLLFNI                           | 200      |
| NeSL1_TV             | 153 | PDSIINLLKDLKYG-----ARTAIYTRH-----AHSEIVPVRRGVIGQCCLSPILFNC                         | 200      |
| Utopial_ACa          | 155 | PRYLRLDAIGAIRYH-----SALFVQVGD-----QETTGVIPIRMCGVKQGCPLSPLLFNL                      | 203      |
| Utopial_LV           | 156 | PDLSLVTLLMDAYNG-----ASTSFTLTG-----GQTDTPVIRSGVKQGCPLSPILFNL                        | 203      |
| Utopial_CF1          | 156 | PGGLVNVWNSMYDG-----CSTRVRTAE-----GYTTPVLIRSGVRQGCPLSPIVFDL                         | 203      |
| Utopial_AEc          | 156 | PRGLIAIWDSMYDG-----CTTRVRTAE-----GHTAPIPIRSGVRQGCPLSPILFNL                         | 203      |
| Utopial_CMy          | 156 | PENFLRVIREVYEG-----CSTTIRSV-----GETAEPIIRSGVKQGCPLSPILFNL                          | 203      |
| UtopialB_CPB         | 156 | PETFIQILRLDYKD-----CTTTIRATD-----GETDAIPIRRGVKQGCPLSPILFNL                         | 203      |
| Utopial_ENe          | 156 | PKHAQEVIMDLYQG-----ASFCLTKE-----GCTGRIVNQRGVKQGCPLSPILFNL                          | 204      |
| R52_SM               | 160 | SEEFITIVKLLYTD-----TQSFYSYCGP-----IVTPNLSIKKGVKQGCPLSPMLFSI                        | 207      |
| R5                   | 167 | GTSALTILKNLYLD-----NYTNVTCGE-----SKIENVKLNKGVKQGCPLSMLLFNI                         | 214      |
| R51_SM               | 159 | KNKTINLIKDMYND-----CYTVYECGE-----KHTKTIKVNNGVKQGCPLSMTLFSL                         | 206      |
| LIN9_SM              | 161 | DEETINLLKEIYKD-----CSTKYKCGK-----NESEKIKITKGVKQGCPLSMTLFSL                         | 208      |
| R4_Hmel              | 156 | HPLLITLSSVMLS-----WKTRLKLINNN-----ETLITDWIKIQRGIFQGDALSPILFNL                      | 207      |
| R42_AS               | 159 | KTITATFFKLMDAG-----WETRYELKYKTKRGCMISIQRSQPVKIVNGIFQGDALSPILFNL                    | 215      |
| R4_AL                | 159 | PRSVQLTLKRLMSD-----WETRFESTQCR-----PKLRSDMKMVLNIFQGDALSPILFNL                      | 215      |
| R45_BX               | 163 | DRKIYYLLKSFMTMN-----WTVRYELRRSG-----RVERSAPIRLVRKGLLQGDALSPILFNL                   | 214      |
| HERO1_BF             | 158 | PETIRYTMQNYFQD-----FRVSVTTPQ-----FTTGWQQLLEKGIAMGCTISPLFVL                         | 205      |
| HEROTn               | 158 | PCSIKTLIMDYYS-----FHLRFVTSG-----SVTSEWHRLEKGIITGCTISVILFAL                         | 206      |
| HERO1_HP             | 160 | PESLVSIMNNYYVG-----LYARFSVKD-----WNSEWQKFSVGIFPMGCTLSPILFVI                        | 207      |
| HERO1_SR             | 159 | QPLFRNLISYSS-----YAISVSIND-----QLTPLVVRKGLVQGDPLSPILFNL                            | 206      |
| HERO3_BF             | 158 | PPIITTYIKNLYSR-----LKGKVKGPG-----WESDPPFFGRGVFQGDNLSPILFLT                         | 205      |
| R44_Sra              | 151 | IPKPIRNLCKLPKMYKFSVNCSPNDRENGKIIKE-----KKKSWTIMKRGIVQGCCLAPLWFLCL                  | 211      |
| Consensus_aa:        |     | s..h..hl..hh.s.....h.h.....s..h.hppG1.QGssLSPHFs1                                  |          |
| Consensus_ss:        |     | hhhhhhhheeeeee                                                                     | eehhhhhh |
| Conservation:        |     | 244 32 411 1 21 2112275993242414 131 12113 2 1 14513                               |          |
| 6ar1_chainD_p001     | 202 | LLDDLDKELEKRG-----LKFCRYADDNCNIYVKSIRAGQRVKQSIQRFLKTLKLV                           | 253      |
| SLACS                | 196 | GTLATLRLRLQQTFF-----EAQFTAYLDDVTVAAP-----PEELKNVCAATAEAM-----EALGIVN               | 247      |
| CRE1                 | 198 | GMAAAIGPVRQRIP-----GVPVTAYIDDTLAAASGAEGA-----RAAEAYADAL-----ETVGVVT                | 249      |
| CRE2                 | 200 | AMSGIIRPLMEMHP-----RVKVVAYLDDVTLIGP-----HAAVQDFLAEAGPQL-----SRVGFDI                | 251      |
| GAU97528_Ramazottius | 204 | STDYVTRNMTEAPIAAEYGFPL-----CEGEQPVTFGLFADDSTVVGKSRREEAIQLEMAIGLF-----KEIGLEV       | 269      |
| Blag_1               | 199 | STDHILDELSNQELQDEYGFSSV-----SPGLSNITAGLFADDTLIAAKSMNSARILVELAMSRF-----KEIGLDI      | 264      |
| Blag_5               | 199 | STDHILNELSEDEGVAKAYGYQL-----VPGLKPVTVLGFADDTVIVANS-----TTSALETLMKAIERF-----RSIGLEI | 264      |
| Blag_2               | 199 | ATDFIFDELTELSSLQQYGKSI-----SPQLSSLSIMGFADDTLLMGKNS-----ETTLELHIALQRF-----QEIGLQV   | 264      |
| Blag_4               | 200 | SIDFIIKELSEKQITDKYGFKI-----SNNLDHLSVAAFADDLVVIGQN-----MHAARELVMMTKYLL-----QQIGLQL  | 265      |
| Blag_3               | 200 | ALDDTLKELADPNVREVFGLSL-----HPDLEKVSGLAFADNIALISKDEASIQTLINMTVFNL-----DAIGLKV       | 264      |
| Blag_6               | 199 | SIDFIYRNLDNFQNASQGYRL-----TEEVNDLIALSFADDIALISNN-----TSAVFMIERVYNQCL-----TEIGLNL   | 265      |
| R2_PS                | 190 | MIDYILSGTQAGVGVG-----VGERLVSSLAYADDLALLASSRRGLNANLESVLARA-----RSVNILAL             | 248      |
| RaR2                 | 198 | AIEKGLQALDKVEGYD-----IGDVRVNAGAYADDTDLVAGTRLGLQDNLNRRSSSTI-----KQVGLLEV            | 256      |
| R8HmA                | 197 | ILDELAERIEATGCGLD-----LDGHVLSMAFADDYVLLAKDSVEMNELIRVCSSTFF-----KEKGLSV             | 256      |
| R8HmB                | 197 | VIDELAERLEATGCGLD-----LEGHVLISSMAFADDYVLLAKDSVEMNVLNMVNCNTFF-----EKGGLAV           | 256      |
| R24_MR               | 198 | AIDDLVTSINTTDGVQ-----LGNSKIGCLLFADDIIFVSNTVHGINEHLRLRLAFL-----EGTHMEV              | 256      |
| R21_MR               | 198 | VLDGLLQKLDHDTGIQ-----INGTNIAALAFADDIVLMAPTMIMRSHIRIVESYF-----RRHGFV                | 256      |
| R2SmA                | 193 | VLDLLEGLDPMTHLT-----VDGESLNYIAYADDLVVFPAPNAELQKRLKLDRLSLLL-----HEAGWSI             | 251      |
| R2NS1_CSi            | 193 | AMDEVGLSLMPQLGYQ-----FHDTLVDFGAFADDDWVVCASQARLKEKLEAAAVEL-----GRAGMKI              | 251      |
| R2CiB                | 198 | VMDWALSELDPRVGVQ-----IGEQRINHLAFADDILVSSSTKIGMVSSINTLSRHL-----AKSGLEI              | 256      |
| R2NvecA              | 198 | VIDWAVSDLDPHIGVL-----LGESRVSLFAYADDVLVLLSETEAALTSQLNSTIEKSL-----AHCGLKL            | 256      |

|              |     |                               |        |          |           |                      |         |         |             |               |        |       |       |       |        |        |        |        |        |        |        |        |      |     |     |     |     |     |   |   |   |   |   |     |   |   |   |    |   |   |   |   |   |   |     |   |   |    |    |    |    |    |    |    |     |     |     |     |     |     |     |     |     |     |     |
|--------------|-----|-------------------------------|--------|----------|-----------|----------------------|---------|---------|-------------|---------------|--------|-------|-------|-------|--------|--------|--------|--------|--------|--------|--------|--------|------|-----|-----|-----|-----|-----|---|---|---|---|---|-----|---|---|---|----|---|---|---|---|---|---|-----|---|---|----|----|----|----|----|----|----|-----|-----|-----|-----|-----|-----|-----|-----|-----|-----|-----|
| R21_MDe      | 197 | VMDRAIVKLSANIGYT-----YNGAI    | INCIA  | YTD      | II        | LIAETKCGLQSLIDALTSEL | -AS     | FGLQT   | 255         |               |        |       |       |       |        |        |        |        |        |        |        |        |      |     |     |     |     |     |   |   |   |   |   |     |   |   |   |    |   |   |   |   |   |   |     |   |   |    |    |    |    |    |    |    |     |     |     |     |     |     |     |     |     |     |     |
| R2A_NVi      | 197 | VMDAVLRRLLPENTGFL-----MGAEK   | I      | GALV     | FADD      | LVL                  | LAET    | REG     | QASLSRIEAGL | -QE           | QGLEM  | 255   |       |       |        |        |        |        |        |        |        |        |      |     |     |     |     |     |   |   |   |   |   |     |   |   |   |    |   |   |   |   |   |   |     |   |   |    |    |    |    |    |    |    |     |     |     |     |     |     |     |     |     |     |     |
| R21_TCAs     | 197 | VMDELLLEKVNKEYEGGSL-----QSGER | CAIMAF | ADD      | LIL       | LADRDQDVP            | PAMFDDV | STFL    | -ERR        | GMSV          | 257    |       |       |       |        |        |        |        |        |        |        |        |      |     |     |     |     |     |   |   |   |   |   |     |   |   |   |    |   |   |   |   |   |   |     |   |   |    |    |    |    |    |    |    |     |     |     |     |     |     |     |     |     |     |     |
| R2LcA        | 199 | IIDS                          | AI     | RKLP     | DSIGYVI   | -----RDGLK           | INCLAY  | ADD     | LIL         | VASSRAGLKTLLN | IVAEHL | -SLR  | GLDL  | 258   |        |        |        |        |        |        |        |        |      |     |     |     |     |     |   |   |   |   |   |     |   |   |   |    |   |   |   |   |   |   |     |   |   |    |    |    |    |    |    |    |     |     |     |     |     |     |     |     |     |     |     |
| R2L1         | 199 | IIDS                          | AI     | RKLP     | DSIXYLI   | -----RDGLK           | INCLAY  | ADD     | LIL         | VASTRAGLKTLLN | IVAEHL | -SLR  | GLDL  | 258   |        |        |        |        |        |        |        |        |      |     |     |     |     |     |   |   |   |   |   |     |   |   |   |    |   |   |   |   |   |   |     |   |   |    |    |    |    |    |    |    |     |     |     |     |     |     |     |     |     |     |     |
| R2La         | 199 | VINEI                         | IRKLP  | PASIGYPI | -----NSEL | SINCIAY              | ADD     | LIL     | VNTREG      | LKLLGLL       | NEEL   | -PKR  | GLEL  | 258   |        |        |        |        |        |        |        |        |      |     |     |     |     |     |   |   |   |   |   |     |   |   |   |    |   |   |   |   |   |   |     |   |   |    |    |    |    |    |    |    |     |     |     |     |     |     |     |     |     |     |     |
| R2LcB        | 199 | VINEI                         | IRKLP  | PASIGYPI | -----NSEL | SINCIAY              | ADD     | LIL     | VANTREG     | LKLLNLL       | NEEL   | -PKR  | GLEL  | 258   |        |        |        |        |        |        |        |        |      |     |     |     |     |     |   |   |   |   |   |     |   |   |   |    |   |   |   |   |   |   |     |   |   |    |    |    |    |    |    |    |     |     |     |     |     |     |     |     |     |     |     |
| R2NS1_SMed   | 193 | IVELA                         | IKKAYE | SGIGYR   | -----MNGT | VFP                  | IMAY    | ADD     | LIL         | SESGEGQLDL    | IVLT   | TEL   | -RHNG | LEA   | 252    |        |        |        |        |        |        |        |      |     |     |     |     |     |   |   |   |   |   |     |   |   |   |    |   |   |   |   |   |   |     |   |   |    |    |    |    |    |    |    |     |     |     |     |     |     |     |     |     |     |     |
| R21_PPap     | 197 | VMES                          | ALVRL  | DKKLSFS  | -----LYGV | SVNGLAY              | ADD     | VIL     | VAST        | SGGLQKNT      | ESFL   | GAL   | -REI  | GLDL  | 255    |        |        |        |        |        |        |        |      |     |     |     |     |     |   |   |   |   |   |     |   |   |   |    |   |   |   |   |   |   |     |   |   |    |    |    |    |    |    |    |     |     |     |     |     |     |     |     |     |     |     |
| R22_TCAs     | 186 | VLD                           | RALKRL | STDV     | GFRL      | -----T               | DAT     | KVTALAF | ADD         | VVL           | CATT   | ARG   | LQTN  | LDVLE | AEL    | -RLAG  | LLLL   | 245    |        |        |        |        |      |     |     |     |     |     |   |   |   |   |   |     |   |   |   |    |   |   |   |   |   |   |     |   |   |    |    |    |    |    |    |    |     |     |     |     |     |     |     |     |     |     |     |
| R21_PBa      | 201 | VVDR                          | ALGIL  | SEDV     | GYR       | -----L               | ESRL    | INALGY  | ADD         | IVLL          | SSTK   | I     | GLQEN | LTRL  | LHA    | AAF    | -LQN   | GLTI   | 259    |        |        |        |      |     |     |     |     |     |   |   |   |   |   |     |   |   |   |    |   |   |   |   |   |   |     |   |   |    |    |    |    |    |    |    |     |     |     |     |     |     |     |     |     |     |     |
| R28_MR       | 197 | VVDS                          | ILRT   | VPPD     | VGYD      | -----L               | GGS     | RLNALAY | ADD         | FLL           | FAAS   | VWG   | MQEST | LGLVE | QRA    | -GEY   | GLTF   | 255    |        |        |        |        |      |     |     |     |     |     |   |   |   |   |   |     |   |   |   |    |   |   |   |   |   |   |     |   |   |    |    |    |    |    |    |    |     |     |     |     |     |     |     |     |     |     |     |
| R27_MR       | 196 | CFDR                          | VARTL  | SPHIGYD  | -----L    | NNTRI                | STLLY   | ADDA    | FLVSTT      | APGMN         | ILLRS  | VEESA | -GE   | VGL   | SF     | 254    |        |        |        |        |        |        |      |     |     |     |     |     |   |   |   |   |   |     |   |   |   |    |   |   |   |   |   |   |     |   |   |    |    |    |    |    |    |    |     |     |     |     |     |     |     |     |     |     |     |
| R21_IS       | 197 | VLDE                          | YLS    | SLDP     | DIS       | FFV                  | -----S  | GD      | RLRD        | AMAF          | ADD    | LIV   | FAST  | PAG   | LQDR   | LDAL   | VEFF   | -DPR   | GLRV   | 255    |        |        |      |     |     |     |     |     |   |   |   |   |   |     |   |   |   |    |   |   |   |   |   |   |     |   |   |    |    |    |    |    |    |    |     |     |     |     |     |     |     |     |     |     |     |
| R21_RM1      | 197 | VIDE                          | FLAEL  | DPQL     | LAFT      | -----S               | EGMK    | VSA     | MAF         | ADD           | ILT    | TAT   | HWGL  | KQQL  | IDRLN  | SFL    | -GARG  | LKI    | 255    |        |        |        |      |     |     |     |     |     |   |   |   |   |   |     |   |   |   |    |   |   |   |   |   |   |     |   |   |    |    |    |    |    |    |    |     |     |     |     |     |     |     |     |     |     |     |
| R2_FA        | 198 | VMDR                          | MIRKL  | PKPE     | GVN       | -----V               | GSKHYN  | GLTF    | ADDD        | LLL           | FATT   | PEGL  | QSS   | DI    | IVHL   | FL     | -LEC   | G      | LLI    | 256    |        |        |      |     |     |     |     |     |   |   |   |   |   |     |   |   |   |    |   |   |   |   |   |   |     |   |   |    |    |    |    |    |    |    |     |     |     |     |     |     |     |     |     |     |     |
| R25_MR       | 196 | IIDR                          | LLKL   | IPPE     | IGVD      | -----V               | GESH    | FNALAF  | ADDD        | LLF           | MAST   | T     | KGL   | QT    | CLD    | LASE   | YEL    | -LKC   | GLRV   | 254    |        |        |      |     |     |     |     |     |   |   |   |   |   |     |   |   |   |    |   |   |   |   |   |   |     |   |   |    |    |    |    |    |    |    |     |     |     |     |     |     |     |     |     |     |     |
| R2_Dan       | 198 | VIDR                          | LLRSL  | P        | SEIGAK    | -----V               | GNAIT   | NAAAF   | ADD         | IVL           | FAET   | PMGL  | QK    | LD    | TTV    | CF     | -SSV   | GLTL   | 256    |        |        |        |      |     |     |     |     |     |   |   |   |   |   |     |   |   |   |    |   |   |   |   |   |   |     |   |   |    |    |    |    |    |    |    |     |     |     |     |     |     |     |     |     |     |     |
| R2_DSi       | 198 | VMDR                          | LLRNL  | P        | SEIGAK    | -----V               | GNAIT   | NAAAF   | ADD         | LVL           | FAET   | RMQ   | QVLL  | DKT   | LD     | FL     | -SLV   | GLKL   | 256    |        |        |        |      |     |     |     |     |     |   |   |   |   |   |     |   |   |   |    |   |   |   |   |   |   |     |   |   |    |    |    |    |    |    |    |     |     |     |     |     |     |     |     |     |     |     |
| R2B_DM       | 198 | IIDR                          | LLRSL  | PKD      | IGVH      | -----V               | GNAK    | VNACAF  | ADD         | LML           | FAST   | P     | KGL   | QEL   | LNTT   | V      | KFL    | -SSV   | GLTL   | 256    |        |        |      |     |     |     |     |     |   |   |   |   |   |     |   |   |   |    |   |   |   |   |   |   |     |   |   |    |    |    |    |    |    |    |     |     |     |     |     |     |     |     |     |     |     |
| R2_DPe       | 198 | IIDQ                          | LLRSY  | PNE      | IGAT      | -----I               | GDHT    | TNAAAF  | ADD         | IVL           | FAET   | RL    | GL    | Q     | TM     | LD     | TTV    | DFL    | -SSV   | GLTL   | 256    |        |      |     |     |     |     |     |   |   |   |   |   |     |   |   |   |    |   |   |   |   |   |   |     |   |   |    |    |    |    |    |    |    |     |     |     |     |     |     |     |     |     |     |     |
| R2_BM        | 198 | VMD                           | LILAS  | LPER     | VGYR      | -----L               | EMEL    | V       | SALAY       | ADD           | LVL    | L     | AGS   | IDG   | AQD    | HDV    | Q      | GRY    | M      | -RQM   | GLRL   | 256    |      |     |     |     |     |     |   |   |   |   |   |     |   |   |   |    |   |   |   |   |   |   |     |   |   |    |    |    |    |    |    |    |     |     |     |     |     |     |     |     |     |     |     |
| R2C_NGi      | 197 | IMDE                          | MLKRL  | PKPE     | IGVN      | -----L               | DGL     | FVN     | AMAF        | ADD           | LSL    | VAN   | TE    | QGL   | QIL    | IDE    | ATS    | SFL    | -GLC   | GLRA   | 255    |        |      |     |     |     |     |     |   |   |   |   |   |     |   |   |   |    |   |   |   |   |   |   |     |   |   |    |    |    |    |    |    |    |     |     |     |     |     |     |     |     |     |     |     |
| R2_AM        | 197 | VIDQ                          | IIRSL  | P        | ETVGV     | QL                   | -----D  | ANT     | KLNS        | MAF           | ADD    | LIL   | SSS   | EAG   | MRR    | ML     | GVL    | AGVS   | -SKF   | GLFI   | 256    |        |      |     |     |     |     |     |   |   |   |   |   |     |   |   |   |    |   |   |   |   |   |   |     |   |   |    |    |    |    |    |    |    |     |     |     |     |     |     |     |     |     |     |     |
| R2CiD        | 199 | VLD                           | ELIDEL | SSS      | FGYTL     | -----D               | GS      | KL      | SVMAF       | ADD           | VLS    | SGS   | L     | AG    | RLK    | LETT   | I      | VH     | FL     | -LRC   | G      | MGL    | 258  |     |     |     |     |     |   |   |   |   |   |     |   |   |   |    |   |   |   |   |   |   |     |   |   |    |    |    |    |    |    |    |     |     |     |     |     |     |     |     |     |     |     |
| R21_BTe      | 198 | CLEP                          | LEEIEE | EQAS     | GINV      | -----S               | HRK     | VSVLAF  | ADD         | IVLL          | GAD    | ARE   | AHQ   | Q     | IN     | VT     | DYL    | -QSL   | MMNL   | 258    |        |        |      |     |     |     |     |     |   |   |   |   |   |     |   |   |   |    |   |   |   |   |   |   |     |   |   |    |    |    |    |    |    |    |     |     |     |     |     |     |     |     |     |     |     |
| R22_MR       | 198 | VMS                           | LI     | LKLES    | MPG       | FKI                  | -----N  | DR      | TNLS        | SLAF          | ADD    | LMF   | LAD   | N     | VED    | ARA    | Q      | LN     | L      | CQ     | FL     | -DSV   | MDMI | 257 |     |     |     |     |   |   |   |   |   |     |   |   |   |    |   |   |   |   |   |   |     |   |   |    |    |    |    |    |    |    |     |     |     |     |     |     |     |     |     |     |     |
| R2_KF        | 197 | VMD                           | PI     | IRD      | LQ        | RKGR                 | -----I  | GHE     | I           | ALAF          | ADD    | IVL   | L     | ADS   | IDG    | AQD    | HDV    | Q      | GRY    | M      | -NKL   | G      | MTL  | 254 |     |     |     |     |   |   |   |   |   |     |   |   |   |    |   |   |   |   |   |   |     |   |   |    |    |    |    |    |    |    |     |     |     |     |     |     |     |     |     |     |     |
| R2B_NVi      | 197 | VLEP                          | LLER   | LQET     | SGVE      | -----I               | EGM     | NLS     | CAAF        | ADD           | IVC    | F     | ANT   | A     | PE     | AGR    | Q      | LR     | M      | VAD    | YL     | -GR    | L    | MSL | 255 |     |     |     |   |   |   |   |   |     |   |   |   |    |   |   |   |   |   |   |     |   |   |    |    |    |    |    |    |    |     |     |     |     |     |     |     |     |     |     |     |
| R2Amel       | 199 | IIDP                          | I      | IGTL     | DETT      | EGIK                 | -----L  | ENEN    | I           | SVLAF         | ADD    | LVL   | L     | AKD   | KET    | AD     | K      | Q      | N      | L      | RI     | NE     | YL   | -D  | LM  | KMV | 258 |     |   |   |   |   |   |     |   |   |   |    |   |   |   |   |   |   |     |   |   |    |    |    |    |    |    |    |     |     |     |     |     |     |     |     |     |     |     |
| R2_Rm_ribo   | 199 | IMEP                          | MINE   | LES      | KPGYR     | -----D               | ETQ     | I       | SSLV        | FADD          | LIL    | L     | AD    | PA    | K      | Q      | IN     | VT     | DYL    | -C     | N      | L      | G    | MSL | 258 |     |     |     |   |   |   |   |   |     |   |   |   |    |   |   |   |   |   |   |     |   |   |    |    |    |    |    |    |    |     |     |     |     |     |     |     |     |     |     |     |
| R2_Bg_ribo   | 198 | IMEP                          | LLNK   | LES      | LG        | V                    | TL      | -----A  | DGS         | QLAC          | LAF    | ADD   | LIL   | L     | AD     | N      | R      | E      | R      | E      | L      | L      | T    | E   | E   | F   | L   | -D  | L | G | M | K | I | 257 |   |   |   |    |   |   |   |   |   |   |     |   |   |    |    |    |    |    |    |    |     |     |     |     |     |     |     |     |     |     |     |
| R2_RU        | 194 | AIDP                          | V      | LR       | S         | LEEF                 | Q       | GG      | LP          | -----L        | GNS    | A     | K     | I     | L      | A      | F      | DD     | I      | L      | G      | A      | S    | A   | G   | A   | Q   | Q   | M | V | D | M | L | G   | I | G | L | -T | S | C | G | L | G | V | 253 |   |   |    |    |    |    |    |    |    |     |     |     |     |     |     |     |     |     |     |     |
| R2Dr         | 203 | ALD                           | P      | L        | I         | Q                    | S       | L       | E           | R             | T      | G     | K     | C     | E      | -----A | B      | E      | G      | H      | K      | V      | T    | A   | L   | A   | F   | ADD | L | A | L | V | A | G   | S | W | E | G  | M | A | H | N | L | A | L   | V | D | E  | F  | C  | -L | T  | T  | G  | L   | T   | V   | 262 |     |     |     |     |     |     |     |
| R21_GA       | 203 | ALD                           | P      | L        | I         | Q                    | S       | L       | E           | R             | E      | G     | R     | G     | F      | P      | -----V | G      | N      | K      | S      | I      | T    | A   | M   | A   | F   | ADD | L | A | I | V | S | D   | S | W | E | G  | M | R | A | N | L | D | I   | L | V | D  | F  | C  | -E | L  | T  | G  | M   | R   | T   | 262 |     |     |     |     |     |     |     |
| R21_SSa      | 203 | ALD                           | P      | M        | I         | D                    | T       | L       | E           | R             | Y      | G     | L     | G     | Y      | R      | -----M | G      | E      | Q      | I      | T      | A    | L   | A   | F   | ADD | L   | V | L | V | S | D | S   | W | E | G | M  | A | C | N | I | R | L | E   | E | F | C  | -R | L  | T  | G  | L  | R  | I   | 262 |     |     |     |     |     |     |     |     |     |
| R2O1A        | 204 | AMDP                          | L      | I        | H         | K                    | L       | E       | T           | A             | G      | T     | G     | L     | K      | -----W | G      | D      | L      | S      | I      | A      | T    | L   | A   | F   | ADD | L   | V | L | V | S | D | S   | E | E | G | M  | C | R | S | L | G | I | L   | E | K | F  | C  | -Q | L  | T  | G  | L  | R   | V   | 263 |     |     |     |     |     |     |     |     |
| R21_Gav      | 203 | AMD                           | P      | L        | I         | A                    | K       | L       | E           | T             | D      | G     | Q     | G     | V      | -----V | G      | S      | A      | S      | L      | T      | T    | L   | A   | F   | ADD | L   | V | L | L | S | D | S   | W | E | G | M  | L | K | N | I | S | I | L   | E | D | F  | C  | -N | L  | T  | G  | L  | R   | V   | 262 |     |     |     |     |     |     |     |     |
| R21_ZA       | 203 | AMD                           | P      | L        | L         | K                    | L       | E       | S           | S             | G      | K     | F     | H     | -----R | G      | Q      | S      | S      | I      | T      | A      | M    | A   | F   | ADD | L   | V   | L | L | S | D | S | W   | E | G | M | A  | C | N | I | R | L | E | E   | F | C | -R | L  | T  | G  | L  | R  | V  | 263 |     |     |     |     |     |     |     |     |     |     |
| R21_TG       | 204 | AMD                           | P      | L        | L         | C                    | K       | L       | E           | S             | S      | G     | K     | Y     | H      | -----R | G      | Q      | S      | S      | I      | T      | A    | M   | A   | F   | ADD | L   | V | L | L | S | D | S   | W | E | N | M  | N | T | N | I | S | I | L   | E | T | F  | C  | -N | L  | T  | G  | L  | R   | V   | 263 |     |     |     |     |     |     |     |     |
| R21_GFo      | 204 | AMD                           | P      | L        | L         | C                    | K       | L       | E           | H             | G      | K     | F     | H     | -----R | G      | Q      | S      | K      | I      | T      | A      | M    | A   | F   | ADD | L   | V   | L | L | S | D | S | W   | E | D | M | N  | A | N | I | K | I | L | E   | T | F | C  | -D | L  | T  | G  | L  | R  | V   | 263 |     |     |     |     |     |     |     |     |     |
| R2NS1_CGi    | 201 | AMD                           | P      | L        | L         | E                    | I       | G       | R           | Q             | N      | G     | Y     | -K    | F      | G      | P      | -----E | E      | S      | D      | R      | I    | E   | S   | L   | C   | Y   | A | D | D | N | A | L   | M | T | E | S  | P | D | M | N | E | N | A   | L | V | E  | K  | F  | C  | -C | E  | T  | G   | M   | R   | L   | 263 |     |     |     |     |     |     |
| NeSL1_TV     | 201 | CLD                           | P      | L        | L         | Y                    | A       | V       | Q           | R             | R      | H     | F     | E     | D      | Y      | R      | F      | Q      | D      | -----K | A      | G    | Q   | Y   | S   | I   | A   | I | Q | A | Y | A | D   | D | V | L | V  | I | S | P | T | H | E | G   | M | Q | R  | I  | L  | N  | T  | V  | D  | E   | F   | Q   | -K  | I   | A   | K   | L   | K   | V   | 266 |
| Utopial_ACa  | 204 | CVEP                          | A      | L        | R         | C                    | L       | R       | R           | T             | T      | G     | Y     | K     | F      | Y      | -----G | T      | S      | I      | T      | V      | E    | G   | Q   | A   | Y   | A   | D | D | L | L | T | A   | P | S | A | Y  | H | A | A | R | Q | V | A   | T | I | E  | E  | W  | A  | -N | W  | A  | G   | V   | S   | F   | 264 |     |     |     |     |     |     |
| Utopial_LV   | 204 | AIE                           | L      | I        | I         | R                    | A       | V       | K           | N             | A      | S     | D     | N     | H      | L      | G      | V      | T      | -----V | Q      | G      | K    | N   | L   | S   | I   | L   | A | Y | A | D | D | L   | V | L | S | R  | D | T | E | G | L | Q | S   | L | L | V  | A  | G  | S  | S  | A  | -S | T   | L   | Q   | M   | Q   | F   | 267 |     |     |     |     |
| Utopial_CF1  | 204 | AID                           | S      | V        | L         | R                    | A       | V       | T           | A             | V      | D     | A     | G     | F      | D      | -----L | L      | G      | S      | R      | H      | S    | V   | V   | A   | Y   | A   | D | D | I | A | L | V   | A | D | S | P  | E | G | M | R | R | L | L   | A | V | A  | E  | G  | A  | -S | S  | V  | G   | L   | R   | F   | 263 |     |     |     |     |     |     |
| Utopial_AEc  | 204 | AID                           | S      | V        | R         | V                    | A       | A       | E           | X             | N      | D     | G     | S     | Y      | -----L | H      | G      | N      | T      | W      | S      | A    | L   | A   | Y   | A   | D   | D | I | A | L | L | A   | Q | T | P | E  | G | M | R | M | L | A | S   | V | E | A  | E  | A  | -A | S  | V  | G  | L   | R   | F   | 263 |     |     |     |     |     |     |     |
| Utopial_CMy  | 204 | AMEP                          | L      | L        | R         | A                    | I       | S       | N           | G             | T      | D     | G     | F     | N      | -----L | H      | G      | E      | R      | V      | S      | V    | L   | A   | Y   | A   | D   | D | L | V | L | T | A   | D | D | P | E  | S | L | Q | G | M | L | D   | A | T | S  | R  | A  | A  | -D | W  | M  | G   | L   | R   | F   | 263 |     |     |     |     |     |     |
| UtopialB_CPB | 204 | AMEP                          | L      | I        | R         | A                    | I       | S       | S           | G             | P      | T     | G     | F     | D      | -----L | H      | G      | K      | I      | S      | I      | L    | A   | Y   | A   | D   | D   | L | A | L | V | A | D   | S | S | E | S  | L | Q | M | L | D | V | T   | S | Q | A  | A  | -E | W  | M  | G  | L  | R   | F   | 263 |     |     |     |     |     |     |     |     |
| Utopial_ENe  | 205 | AIEP                          | L      | L        | Q         | R                    | L       | A       | A           | C             | N      | E     | G     | L     | R      | T      | T      | D      | -----G | K      | P      | Q      | V    | K   | V   | S   | H   | M   | A | Y | A | D | D | L   | K | T | V | A  | A | T | R | V | G | I | S   | K | L | H  | Q  | V  | E  | D  | F  | L  | -Q  | W   | T   | G   | L   | K   | A   | 270 |     |     |     |
| R52_SM       | 208 | AINP                          | V      | L        | E         | A                    | I       | S       | R           | S             | C      | I     | E     | P     | M      | -----I | G      | D      | S      | P      | V      | Q      | L    | A   | Y   | A   | D   | D   | I | A | L | V | A | N   | N | V | E | N  | I | Q | K | I | V | D | V   | A | E | A  | -T | E  | I  | G  | F  | E  | Y   | 268 |     |     |     |     |     |     |     |     |     |
| R5           | 215 | F                             | I      | N        | I         | I                    | R       | A       | I           | E             | A      | M     | P     | D     | V      | H      | G      | Y      | P      | -----L | G      | D      | M    | D   | I   | R   | I   | L   | A | Y | A | D | D | I   | A | L | I | S  | D | S | H | K | D | I | Q   | E | M | V  | Y  | K  | A  | E  | Y  | I  | G   | -R  | I   | L   | G   | L   | L   | F   | 276 |     |     |
| R51_SM       | 207 | T                             | I      | N        | F         | I                    | L       | Q       | N           | I             | L      | K     | E     | Y     | P      | L      | I      | -----I | H      | N      | H      | N      | I    | S   | I   | M   | A   | Y   | A | D | D | L | V | L   | I | A | D | T  | R | E | K | M | R | K | M   | I | K | D  | I  | T  | K  | Y  | -D | S  | A   | T   | L   | K   | F   | 265 |     |     |     |     |     |
| LI           | 209 | C                             | I      | Q        | I         | Y                    | L       | I       | Q           | I             | A      | E     | K     | K     | G      | A      | T      | -----I | A      | G      | E      | V      | C    | I   | L   | A   | Y   | A   | D | D | L | V | I | V   | A | N | T | A  | K | D | M | Q | M | L | L   | T | T | I  | E  | N  | L  | A  | -Q | Q  | A   | D   | L   | I   | F   | 268 |     |     |     |     |     |
| R4_Hmel      | 208 | ALN                           | P      | L        | S         | E                    | L       | L       | N           | N             | T      | N     | T     | G     | F      | L      | K      | H      | N      | -----N | T      | Y      | H    | I   | I   | S   | H   | L   | M | Y | M | D | D | I   | K | L | Y | A  | S | N | N | K | E | L | K   | I | A | D  | L  | V  | A  | S  | -T | D  | I   | R   | M   | E   | F   | 271 |     |     |     |     |     |
| R42_AS       | 216 | S                             | V      | S        | P         | I                    | S       | A       | L           | E             | N      | K     | A     | K     | P      | Y      | R      | S      | S      | V      | Q      | -----L | S    | G   | K   | G   | F   | S   | L | G | H | Q | F | Y   | V | D | D | L  | K | I | Y | A | P | N | R   | E | L | V  | N  | A  | L  | V  | A  | K  | N   | S   | -T  | A   | I   | G   | L   | D   | L   | 282 |     |
| R4_AL        | 211 | C                             | I      | A        | P         | I                    |         |         |             |               |        |       |       |       |        |        |        |        |        |        |        |        |      |     |     |     |     |     |   |   |   |   |   |     |   |   |   |    |   |   |   |   |   |   |     |   |   |    |    |    |    |    |    |    |     |     |     |     |     |     |     |     |     |     |     |



R21\_MDe 256 NIG-----K**SSTIS**LV--PSGRQKK-----IKVITEPS**F**L--VSG---QFLSAIGVMDVWRYLYG 302  
R2A\_NVi 256 MPR-----K**CHT**LALV--PSGKEKK-----IKVETHK**P**FT--VGN---**Q**ET**Q**LGHADQWKYLYG 302  
R21\_TCAs 258 NPA-----K**CRA**LIAI--AVSGR-----**S**V**V**RTGSS**Y**K--IHN---**T**PIPNVDALDA**F**KYLYG 302  
R2LcA 259 NAA-----K**CH**GLSII--ASGKAKT-----TYVSAAD**S**LD--LDG---QPIKNLGVLDTW**T**YLYG 305  
R2Ll 259 NAA-----K**CH**GLSII--ASGKAKT-----TYVXALES**L**D--LDG---QPIKNLRLVLDTW**T**YLYG 305  
R2La 259 NAS-----K**CF**GLSLT--ALGKLKK-----THLCTSDQ**L**D--LHG---TLIKNLTA**E**ESWVYLYG 305  
R2LcB 259 NAS-----K**CF**GLSLT--ALGKLKK-----THLCTSDQ**L**D--LHG---TLIKNLTA**E**ESWVYLYG 305  
R2NS1\_SMed 253 NAD-----K**CAS**I**I**AK--KDGQKQ-----KWVISSDS**V**L--AAG---K**T**MP**CM**NANSM**Y**KYLYG 298  
R21\_PPap 256 **N**LA-----K**CK**SLSLK--PSGRDKR-----CKVLS**E**S**Q**LS--IGG---**T**SV**P**QVDLV**G****F**WRYLYG 302  
R22\_TCAs 246 **N**PN-----K**Q**AL**S**LV--ASGR**D**HK--VKLVTKPT**F**K--V**G**Q---N**T**I**H**QVDASSI**W**KYLYG 292  
R21\_PBa 260 **N**AN-----K**T**GVLSMV--ASGRDKK-----VKIDMT**P**Y**F**T--V**G**G---**A**LIP**Q**RS**P**VD**T**WYLYG 306  
R28\_MR 256 **N**AQ-----K**CS**VLSLV--PSGDKDK-----MKVIT**P**L**F**H--LGRQ---A**F**IP**Q**IT**T**AE**W**RYLYG 303  
R27\_MR 255 **N**TS-----K**C**SALSLI--PSGKEKK-----MKVGT**T**PT**F**K--**T**SQ---G**F**IT**Q**IT**P**S**Q**EWRYLYG 301  
R21\_IS 256 **N**VK-----K**S**FTLSLQ--PGRDKK-----KV**V**CD**Q**I**F**T--**I**G**G**---**T**PL**P**ASKVAT**P**WRYLYG 301  
R21\_RMl 256 **N**AA-----K**S**TT**L**IV--PSGWQKR-----SKIR**T**DI**D****F**F--V**N**G---E**R**L**A**TT**N**CT**T**STWRYLYG 302  
R2\_FA 257 **N**KQ-----K**S**FVLTVK--AYPKLKK-----TAVIVTE**K**Y**M**--L**D**R---HIL**P**AID**R**EKL**F**HYLYG 303  
R25\_MR 255 **N**AX-----K**S**FT**V**ALR--NVPHVKK-----SXVDGKV**R**FR--C**L**G---H**E**MPS**L**TRED**Q**WRYLYG 301  
R2\_Dan 257 **N**TD-----K**C**FT**V**SIK--GQAKQK-----CTV**V**ERR**S****F**L--**I**G**G**---R**E**CP**S**L**K**RTDEW**K**YLYG 302  
R2\_DSi 257 **N**AD-----K**C**FT**V**GIK--GQPKQK-----CTVLEA**Q**S**F**Y--V**G**S---R**E**IP**S**L**K**RTDEW**K**YLYG 302  
R2B\_DM 257 **N**AD-----K**C**FT**T**SIK--GQPKQK-----VT**V**VE**Q**RT**F**C--**I**G---R**A**RV**Q**L**K**RS**E**EW**K**YLYG 301  
R2\_DPe 257 **N**SD-----K**C**FT**V**GIK--GQPKQK-----CTV**V**IP**E**T**F**R--**I**G**S**---R**S**CP**A**L**K**RTDEW**K**YLYG 302  
R2\_BM 257 **N**CR-----K**S**SS**F**LIT--PDGHRKK-----HHY**L**T**E**RT**F**N--**I**G**G**---K**P**L**R****Q**V**S**C**V**ER**W**RYLYG 303  
R2C\_NGi 256 **N**PN-----K**C**VT**L**AIK--TIPKEKK-----**T**AID**P**SS**H**FR--**I**G**N**---A**V**IP**S**L**K**RTDEW**V**YLYG 302  
R2\_AM 257 **H**PG-----K**C**TY**L**AMI--WAGQKQK-----MK**I**A**T**DL**S****F**E--**I**G**G**---G**F**MT**P**V**G**VT**E**TW**K**YLYG 303  
R2CiD 259 **N**VQ-----K**N**CT**S**LGW**K**--SMVGGK**Q**--V**L**RL**R**TE**P****F**V--V**G**D---S**E**L**A**CL**G**PN**S**T**C**RYLYG 305  
R21\_BTe 259 **S**IE-----K**Q**CT**F**EVV--AKKD-----TW**F**IK**E**PK**L**K--**I**G**N**---Q**I**MP**T**VD**P**DEA**F**KYLYG 302  
R22\_MR 258 **S**ID-----K**CA**A**F**Q**I**I--TSKD-----S**W**Y**I**ID**P****H**L**T**--V**A**Q---G**S**I**A****F**L**G**PD**T****P**LSYLYG 301  
R2\_KF 255 **N**PR-----K**S**SS**F**LIT--AMRK-----TWIC**R**DP**L**S--**I**G**E**---T**K**V**P**GAR**P**SSA**L**KYLYG 298  
R2B\_NVi 256 **S**VS-----K**C**IA**V**EYV--PHRK-----TWY**T**K**N**P**G**L**E**--V**N**G---N**A**VP**S**IS**P**SE**T****F**KYLYG 299  
R2Amel 259 **S**AE-----K**C**TT**F**EIK--RQNK-----TW**F**LGD**P****Q**L**T**--L**G**Q---Q**R**IPYAD**P**EAA**I**KYLYG 302  
R2\_Rm\_ribo 259 **A**AS-----K**S**FA**F**Q**I**T--RTQDSWCLVD**P**GL**K**LS**K**GDE**E**RC--**H**N**L**---E**G**IP**F**AG**V**DR**L**RYLYG 311  
R2\_Bg\_ribo 258 **W**AP-----K**S**VAF**E**IV--PTKDS-----W**C**VVD**P**GL**R**L--R**Q**G---G**A**IT**Y**AG**P**D**H**SL**K**YLYG 302  
R2\_RU 254 **S**HR-----K**CF**G**F**Q**I**V--NKNK-----TW**A**IVDP**M**IT--L**N**G---S**S**LP**F**SG**P**ED**R**LPYLYG 297  
R2\_RL 254 **S**HR-----K**CF**G**F**Q**I**V--NKNK-----TW**T**IVDP**M**IT--L**N**G---S**S**LP**F**SG**P**ED**R**LPYLYG 297  
R2Dr 263 **Q**PK-----K**CH**S**F**MVR--PCRG**A**-----F**T**VND**C**PP**V**W--L**G**G---K**A**L**Q**L**T**NI**E**NS**I**KYLYG 307  
R21\_GA 263 **Q**PS-----K**CH**G**F**LIE--KSGSR**S**-----Y**K**VNR**C**E**P**W**L**--L**N**D---T**A**L**H**MV**G**PK**E**SI**K**YLYG 308  
R21\_SSa 263 **Q**PR-----K**CH**G**F**L**Q**--K**I**QRA-----R**S**VNL**C**K**P**W**I**--V**G**C---E**E**L**H**MV**G**PE**E**SV**S**YLYG 307  
R20LA 264 **Q**PR-----K**CH**G**F**FMD--K**G**-----V**V**NG**C**G**T**W**E**--**I**C**G**---S**P**I**H**MI**P**GES**V**RYLYG 304  
R21\_Gav 263 **Q**PK-----K**C**Q**G**F**F**LN--P**T**CDS-----F**T**VNN**C**E**A**W**K**--**I**A**G**---R**E**IT**M**L**G**PG**E**STRYLYG 307  
R21\_ZA 264 **Q**GQ-----K**CH**G**F**YIK--PTKDS-----Y**T**INN**C**PA**W**T--**I**N**G**---T**P**LN**M**IN**P**GESE**K**YLYG 308  
R21\_TG 264 **Q**GQ-----K**CH**G**F**YIK--PTKDS-----Y**T**IND**C**A**W**T--**I**N**G**---T**P**LN**M**ID**P**GESE**K**YLYG 308  
R21\_GFo 264 **Q**GQ-----K**CH**G**F**YIK--PTKDS-----Y**T**VNN**C**A**W**T--**I**N**G**---T**P**LN**M**IN**P**GESE**K**YLYG 308  
R2NS1\_CGi 264 **N**IK-----K**S**AT**P**CI**T**--PCGSR**S**Y-----T**V**NT**T**K**T**K**V**A--**I**K**G**---E**R**VP**V**IP**D**PG**C**M**K**YLYG 310  
NeSLl\_TV 267 **A**PQ-----K**C**VT**L**AKT--S**T**A-----I**Q**PF**R**--**I**G**P**---D**E**IP**I**K**T**SMD**N**ITYLYG 304  
Utopial\_ACa 265 **V**VQ**A**LSLDAPAG**K**CA**A**L**A**IN--F**E**GG-----L**M**H**S**ID**P****A**L**K**--V**Q**G---A**A**IP**A**MSR**N**NV**Y**RYLYG 317  
Utopial\_LV 268 **K**PQ-----K**C**AT**L**TL**D**--C**K**R-----G**T**N**V**R**Q**SA**H**H--**I**Q**G**---A**A**IP**S**L**T**E**E**ER**Y**RYLYG 310  
Utopial\_CFl 264 **N**PA-----K**C**AT**L**H**L**A--A**G**S-----G**G**R**V**L**P**TT**F**V--**I**Q**G**---Q**P**V**H**L**S**SG**E****P**Y**R**H**L**G 306  
Utopial\_AEc 264 **N**PA-----K**C**AT**L**H**V**G--A**G**N-----G**G**R**V**L**P**TS**F**Q--**I**Q**G**---E**T**IN**P**LA**Q**GES**Y**TH**L**G 306  
Utopial\_CMy 264 **N**AK-----K**C**AT**L**HID--G**S**K-----R**D**S**V**QT**T**G**F**Q--**I**Q**G**---E**P**V**I**PLA**G**Q**A**Y**H**L**G** 306  
UtopialB\_CPB 264 **N**PK-----K**C**AS**L**HVD--G**G**A-----R**A**L**V**RP**S**R**F**L--**I**Q**G**---E**P**MA**S**L**E**E**G**E**V**Y**Q**H**L**G 306  
Utopial\_ENe 271 **N**PS-----K**C**AT**L**GL**K**--V**Q**K**A**-----K**Q**V**P**DP**V**K**L**T--L**H**Y---E**V**LP**V**V**L**KG**E**A**Y**KYLYG 314  
R52\_SM 269 **R**PE-----K**C**G**Y**Q**L**P--R**V**N-----I**N**GE**I**L--**I**N**E**---K**E**IK**L**LS**K**E**F**Y**Q**Y**L**G 307  
R5 277 **N**PS-----K**C**AL**M**D**I**P--H**D**K-----K**R**TP**P**I**L**--V**N**G---E**M**IK**C**V**G**K**A**D**P****Y**KYLYG 316  
R51\_SM 266 **R**PS-----K**C**G**Y**F**Q**LK--R**N**H-----N**D**PP**I**T--L**Y**D---E**Q**IP**I**D**E**N**H**L**Y**KYLYG 304  
LIN9\_SM 269 **K**PA-----K**C**G**Y**RD**P**--R**D**K-----K**S**MM**K**--**I**Y**G**---K**E**IS**V**DE**K**N**Y**TYLYG 306  
R4\_Hmel 272 **G**IE-----K**CK**V**H**SIK--R**G**KS-----Q**Q**NT**Y**I**L**--N**T**G---E**Q**IE**S**MD**E**N**S**T**Y**KYLYG 312  
R42\_AS 283 **N**VE-----K**CA**Q**A**H**T**--P**N**V**Q**-----Q**L**E**V**E**T**L**A**DE**E**P--L**M**EL**P**V**L**GL**R**Q**S**Y**R**YLYG 326  
R4\_AL 278 **N**LS-----K**CA**K**A**HYA--P**H**G**A**-----G**G**AQ**E**AVEG**A**EGSR**K**E**I**P**I**L**G**RA**S**T**Y**KYLYG 323  
R45\_BX 284 **N**ES-----K**S**A**A**A**G**P--S**R**-----T**L**R---S**S**LP**L**L**G**V**K**D**Q****Y**KYLYG 315  
HERO1\_BF 268 **K**PS-----K**S**RS**L**SLR--K**G**K-----S**S**NR**V****F**S--**I**N**N**---Q**D**IP**T**IQ--Q**E**P**V**KS**L**G 306  
HEROTn 269 **K**PG-----K**S**RS**L**VLK--A**G**K-----V**T**DR**F**RY--L**G**G---T**Q**IP**S**V**S**--E**K**P**V**KS**L**G 308  
HERO1\_SP 272 **K**PV-----K**S**RS**L**V**V**H--G**G**K-----V**K**HIE**P****F**A--V**D**G---Q**T**IP**G**V**H**--N**K**P**V**K**F**L**G** 311  
HERO1\_HR 274 **R**VD-----K**CC**V**G**MM--K**K**D**G**-----S**Y**D**Q**L**P**RL**T**--**I**D**N**---I**P**IP**P**V**L**GS**G****F**KYLYG 317  
HERO3\_BF 268 **K**PR-----K**CK**SMS**I**V--S**G**K-----P**S**DIS**F**T--**I**D**G**---D**P**V**K**T**T**--K**D**A**P**E**K**FL**G** 306  
R44\_Sra 273 **N**KD-----K**T**E**Y**S-----I**P**DE**E**K**I**IQ**Y**KY**M**G 294  
Consensus\_aa: p.....**K**t..s.h.....h.....h.....l..h...p.h**c**Y**L**G  
Consensus\_ss: eeeee ee e eeeee

Conservation: 2 22 11 1 2 3114 131 7221452 342 24252314 311  
6arl\_chainD\_p001 271 **F**S**F**T**P**ER**K**A**R**I---R**L**A**P**RS**I**Q**R**L---K**Q**R**I**R**Q**L**T**N**P**N--ISMP**E**RI**H**R**V**N**Q**Y**V**M**G**W**I**G**F**Y**R**L----- 325  
SLACS 276 **R**T**W**P--D**P**M**S**---E**E**IRE**G**EV**E**KK**A**M**E**T**D**RL**F**K**A**IV**E**L**P**--L**Y**N**R**T**R**W**R**I**L**A**M**S**A**M**P**R**I**T**F**LL**R**N**H**----- 333  
CRE1 282 **A**H**F**R**A**RG**T****P**E**A**RT**I**E**W**L**Q**A**A**VE**K**W---R**P**I**H**Q**K**L**R**Q**D**I--I**P**K**N**I**A**M**M**M**T**RIS**L**G**S**K**M**T**F**L**Q**T**H**----- 341  
CRE2 287 **A**G**F**R**G**D**T**A**S**V**E**---E**W**V**W**E**K**T**K**T**H**---D**H**Y**F**E**K**L**Q**S**E**W--L**P**RL**A**R**L**Q**L**L**R**G**S**T**V**PR**L**N**H**LL**R**T**H**----- 343  
GAU97528\_Ramazzottius\_ 311 **A**T**V**T**D**Q**L**D**F**---D**Q**E**V**IK**Q**L---T**D**Q**V**D**R**L**V**H**F**A**H**L**H**A**D**Q**K**L**N**L**N**Q**W**L**P**S**I**I**Y**PL**Q**T**A**---P 366  
Blag\_1 306 **V**S**Y**N**A**T**I**L---D**A**ANS**I**E**E**L---K**N**K**L**D**R**L**A**ST**P**LL**Q**PH**Q**K**Y**T**V**L**C**S**F**IC**P**T**L**I**Y****F**Q**T**T---P 360  
Blag\_5 306 **V**N**F**AD**A**CL**F**---D**S**Q**V**T**L**N**D**L---K**N**K**L**D**L**L**I**S**S**PL**L**N**P**D**Q**K**F**C**I**L**N**SS**I**CP**S**L**I**Y**T**F**Q**T**T**---P 362  
Blag\_2 306 **A**P**F**Q**D**N**A**L**F**---D**K**D**S**T**I**K**Q**L---H**K**K**L**E**L**L**A**SS**P**L**K**S**D**Q**K**F**L**V**L**N**T**A**I**C**P**T**L**I**Y**R**F**Q**T**T---D 361  
Blag\_4 307 **V**S**F**N**D**E**I**I**F**---D**R**ES**F**IT**S**L---R**N**D**L**Q**I**L**V**ST**P**M**L**R**P**D**Q**K**L**N**I**V**N**Q**Y**I**W**K**P**F**I**Y**A**L**Q**M**V**---P 362  
Blag\_3 305 **V**T**F**E**D**E**I**V**L**---D**K**ST**L**L**K**N**F**---E**N**D**L**N**S**L**T**V**S**N**L**L**T****P**D**Q**K**L**N**I**V**N**Q**Y**I**W**S**M**L**I**Y**P**L**Q**C**T**---P 360  
Blag\_6 307 **V**T**Y**N**D**E**I**L**D**---K**S**C**I**I**T**N**L**N---R**S**IS**K**L**I**T**S**S**L**--L**K**P**D**Q**K**L**N**I**L**Q**Y**I**W**P**T**L**I**Y**P**L**Q**C**A**---P 362  
R2\_PS 295 **I**ET**S**P**G**A**A**-----A**R**WS**V**T**G**L---R**N**RL**S**K**L**E**S**A**C**--L**K**P**Q**Q**R**M**H**LL**R**C**Y**LL**P**G**L**Y**Y**G**L**I**H**----- 345  
RaR2 304 **I**S**Y**T**N**E**G**-----P**E**RL**S**L**T**I---E**Q**D**L**ER**L**T**K**A**P**--L**K**P**Q**Q**R**I**H**M**L**N**A**Y**I**P**K**Y**Q**D**K**L**V**L----- 353  
R8HmA 309 **V**S**I**D**P**T**G**K-----T**A**LP**I**EE**W**---K**N**W**M**T**K**L**K**E**C**K--L**K**P**E**Q**K**V**K**I**L**KE**V**V**C**S**R**V**Y**V**L**R**M**----- 359  
R8HmB 308 **V**MID**P**AG**K**-----T**A**LP**I**EE**W**---K**L**W**L**T**R**L**R**E**C**K--L**K**P**D**Q**K**V**K**V**L**KE**V**V**C**A**R**A**N**Y**V**L**R**M----- 358  
R24\_MR 304 **H**G**Y**S**Q**S**G**M-----L**A**PS**P**SN**L**---E**S**M**L**ER**L**RR**A**A--L**R**P**W**Q**K**L**Y**I**L**N**R**Y**L**IP**R**L**I**H**C**Q**S**----- 354  
R21\_MR 304 **L**Q**Y**G**F**R**G**A-----T**C**PT**P**SK**T**---E**E**MLS**R**L**G**K**S**P--L**K**P**W**Q**K**L**N**V**L**Q**R**Y**L**IP**R**L**H**G**M**Q**M**----- 354  
R2SmA 298 **I**K**S**N**F**K**G**R-----C**P**VA**H**IDL**L**---N**N**Y**L**T**E**IS**C**A**P**--L**K**P**Q**Q**R**M**K**L**K**D**N**L**L**P**R**L**L**Y**P**L**T**L----- 349  
R2NS1\_CSi 298 **I**P**F**T**F**K**G**K-----G**V**F**N**H**R**Q**H**L---L**K**L**L**D**E**V**T**R**A**P--L**K**P**H**Q**R**M**E**IT**R**N**Y**L**I**PR**L**T**Y**SL**V**L----- 349  
R2CiB 307 **I**NIDA**Q**G**A**-----R**N**DA**A**RI**L**---T**E**GL**A**E**L**S**R**A**P**--L**K**P**Q**Q**R**L**Y**L**L**R**V**H**L**L**P**K**I**Q**H**GL**V**L----- 357  
R2NvecA 307 **I**NIGA**Q**G**V**-----K**A**A**E**Y**N**A**F**---K**E**AL**D**N**L**S**R**A**P**--L**K**P**Q**Q**R**L**P**LL**K**T**Y**LL**P**Q**L**H**H**SL**V**L----- 357

|               |     |                    |                                       |              |                            |     |
|---------------|-----|--------------------|---------------------------------------|--------------|----------------------------|-----|
| R21_MDe       | 303 | VDFRCNV-----       | LNSEYGI--                             | DANLRKLDRA   | LKPPQRLKMLCVAIIPRYLHSLVL   | 352 |
| R2A_Nvi       | 303 | VVYNSYG-----       | PIQVKINI--                            | AGDLQRVTAAP  | LKPQQRMAILGMFLIPRIHKLVL    | 352 |
| R21_TCAs      | 303 | LEFGHKGV-----      | ERPTIHNL--                            | SVWLNLRRA    | LKPPQKCLFIRQYVIPRLLYGMQN   | 353 |
| R2LcA         | 306 | IPFSHLGR-----      | AEKVSPDL--                            | TNLLNKLQKAP  | LKLQKQKYAVRNFVIPRALHGLIL   | 356 |
| R2Ll          | 306 | IPFSHLGR-----      | AXKFSDDL--                            | SNLLNKLQKAP  | LKIQQKLYAVRNFVIPRALHGLIL   | 356 |
| R2La          | 306 | VPFSHIGR-----      | SKSFSDDL--                            | EALLNKLQKSP  | LKLQKQLFALRVYLIPRLLHGLVL   | 356 |
| R2LcB         | 306 | VPFSHIGR-----      | SKSFSDDL--                            | EALLNKLQKSP  | LKLQKQLFALRVYLIPRLLHGLVL   | 356 |
| R2NS1_SMed    | 299 | IYFGPLGI-----      | TTERLTKIY--                           | SDQLYNIGIAP  | LKPQQRLEMINDFLLPGLLHEAVL   | 350 |
| R21_PPap      | 303 | IWFSGPRV-----      | VSPEQLSM--                            | GVYLERISKAP  | LKPQQRIRILVDYLLPKYTHGSVL   | 353 |
| R22_TCAs      | 293 | IQFRGSGM-----      | CGCGSEGV--                            | AAGLKRTICAP  | LKPQQRMHLLRVFFLPKFYHAWTF   | 343 |
| R21_PBa       | 307 | GMYQGAR-----       | EYASVPPL--                            | ANSIRHITKAP  | LKPQQRLLRLRDCLLPRIYHKLVI   | 356 |
| R28_MR        | 304 | VDFRSTG-----       | PKKSRIIDL--                           | TTYLDRIKAP   | LKPQQRLLKLLRCFLLPRIYHVLVL  | 353 |
| R27_MR        | 302 | VDFQYSG-----       | PKKASRSL--                            | KIELERISKAP  | LKPQQRLLILRVLYLLPRYHHHLVL  | 351 |
| R21_IS        | 302 | MTFTPQGS-----      | INKGTSERL--                           | DLLLTRTSKAP  | LKPQQRLLVLRNLYLLPRIYHRLVL  | 353 |
| R21_RMi       | 303 | VHFGVKGL-----      | EKGLVRRLQ--                           | AILLERVSKAP  | LKPQQRLLVLRFYLLPRIYHRLVL   | 354 |
| R2_FA         | 304 | VPFTAAGR-----      | CRDDTIAHL--                           | KRKIDVLTAP   | LKPQQRLLFALRVVLLPSCYHLLTL  | 355 |
| R25_MR        | 302 | VPFTPEGR-----      | SSARADEQL--                           | KQTLGKLTAP   | LKPQQRLLFALRVVLLXGLHLLSL   | 353 |
| R2_Dan        | 303 | IKFTAEG-----       | ARYDPAEDL--                           | GPKLRLRLTRAP | LKPQQRLLFALRTVLIPQLYHKLTL  | 354 |
| R2_DSi        | 303 | INFATAGR-----      | VRCNPAEDI--                           | GPKLQRLTKAP  | LKPQQRMFALRTVLIPQLYHKLTL   | 354 |
| R2B_DM        | 302 | IHFTADGR-----      | ARYNPSEDI--                           | GPKLERLMQSP  | LKPQQRLLFALRTVLIPQLYHKLTL  | 353 |
| R2_DPe        | 303 | ITFTAQGR-----      | TRYSPADDL--                           | GPKLRLRLTRSP | LKPQQRLLFALRTVLIPQLYHKLTL  | 354 |
| R2_BM         | 304 | VDFEASG-----       | CVTLHSHI--                            | SSALNNISRAP  | LKPQQRLLILRAHLIPRFYHGVVL   | 353 |
| R2C_NGi       | 303 | IKFNSNGR-----      | LISDAKPKL--                           | IKDLELLTKAP  | LKPQQRLLWALKVIVIPGILYRGTL  | 354 |
| R2_AM         | 304 | AYLGQIG-----       | IQPARLSL--                            | QTFLERIAKSP  | LKPQQRLLYLRVHLLPKLIYPLVM   | 353 |
| R2CiD         | 306 | IHFQMVGS-----      | CRIRREI--                             | RESLLRLASSA  | LKPQQRVLMRSFLIPRWYSVTL     | 356 |
| R21_BTe       | 303 | AKIGPWKGV-----     | HCGVIVPEL--                           | LSVVKVRVKLS  | LKPQQRVLLTKYIFPRYIYHLLV    | 355 |
| R22_MR        | 302 | AKISPWVGV-----     | KTDYSIQGL--                           | KACVGRVQSLA  | LKPQQRVLMARHIIPHYLYGLIL    | 354 |
| R2_KF         | 299 | VNYTLSEGL-----     | ESGALIDKL--                           | MQAVNRARGLA  | LKPQQRVLLILRIIPKFLYGLIL    | 351 |
| R2B_NVi       | 300 | AKVSPWKGL-----     | LEGFESDAF--                           | REVISRVQRLP  | LKPMQKVDLLQMYIFPRYTYGLIT   | 352 |
| R2Amel        | 303 | TNPNPWGI-----      | LCKTSIKET--                           | IDAARTVKQLK  | LKPQQRVLLIRTYLIPRYIHKLVA   | 354 |
| R2_Rm_ribo    | 312 | VSVSPWFGI-----     | DETRERANL--                           | TEVHLKLCRLA  | LKPQQRVLLHLYLIPRYHLLVA     | 364 |
| R2_Bg_ribo    | 303 | VKVSPWVGV-----     | DVSDLRTHF--                           | SKTLEDTRKLP  | LKPQQRVLLHLYLIPRYHLLVS     | 355 |
| R2_RU         | 298 | VDNPNWDRK-----     | SRYDAGQRL--                           | ISAAKRGSQLS  | LKPQQRVLLHLYLIPRYHLLVS     | 350 |
| R2_RL         | 298 | VDNPNWDRK-----     | SRYDAGQRL--                           | ISAAKRGSQLS  | LKPQQRVLLHLYLIPRYHLLVS     | 350 |
| R2Dr          | 308 | VKNPNWAGI-----     | EKPDLTVAL--                           | DRWCKRIGKSL  | LKPQQRVLLHLYLIPRYHLLVS     | 360 |
| R21_GA        | 309 | VQVNPWTGI-----     | FAEDTVAKL--                           | RQWVVAISKTP  | LRPLDKVSLLCQFAVPRYFVADH    | 361 |
| R21_SSa       | 308 | MKVSPWHGI-----     | MEPDVPERL--                           | CNWIISIGRSP  | LKPQQRVLLHLYLIPRYHLLVS     | 360 |
| R201A         | 305 | VQVGPGRGV-----     | MEPDLIPTV--                           | HTWIERITEAP  | LKPQQRVLLHLYLIPRYHLLVS     | 357 |
| R21_Gav       | 308 | LNVPWVGI-----      | DKPDLGTQL--                           | SSWLERIGTAP  | LKPQQRVLLHLYLIPRYHLLVS     | 360 |
| R21_ZA        | 309 | LQIDPWTVG-----     | AKYDLSTKL--                           | KIWLESIDRAP  | LKPQQRVLLHLYLIPRYHLLVS     | 361 |
| R21_TG        | 309 | LQFDPWIGI-----     | ARSGLSTKL--                           | DFWLQRIDQAP  | LKPQQRVLLHLYLIPRYHLLVS     | 361 |
| R21_GFo       | 309 | LQFDPWVGI-----     | AKTSLPEKL--                           | DFWLERIDRAP  | LKPQQRVLLHLYLIPRYHLLVS     | 361 |
| R2NS1_CGi     | 311 | SKMSPWVTK-----     | IRKDIVAQL--                           | EGMVESIGGAH  | LKPQQRVLLHLYLIPRYHLLVS     | 363 |
| NeSLl_TV      | 305 | IPISGTKTSRF-----   | AAATGILEKV--                          | KAQIRVVFASH  | LALSQKIIALRVFLLPQLDFYMFH   | 360 |
| Utopial_ACa   | 318 | VHVGTLTALG-----    | QANELLEKA--                           | SRDARTICASG  | LEPWQKVVAIKTFILSRLPFFHFN   | 371 |
| Utopial_LV    | 311 | VPIGLPRLT-----     | SLQESSRKL--                           | SSDIETISSSL  | LAPWQKLDALKTFFVILQYTLRA    | 363 |
| Utopial_CF1   | 307 | VPTGSSVDQ-----     | TPFATIGGL--                           | LEDLRAVDQSL  | LAPWQKLEVVATNLLPRLDLFLRG   | 359 |
| Utopial_AEc   | 307 | VPTGFSVDQ-----     | TPYAAVGDI--                           | VSDLRAVDRSL  | LAPWQKLEIEMLTGTFILSRDLFLRG | 359 |
| Utopial_CMy   | 307 | TPTGFRVRQ-----     | TPEDTIQET--                           | LQDAAKIDASL  | LAPWQKLEIEMLTGTFILSRDLFLRG | 359 |
| UtopialB_CPB  | 307 | TPTGFRVRQ-----     | TPEDTIAEI--                           | LRDAAQIDSSL  | LAPWQKLEIEMLTGTFILSRDLFLRG | 359 |
| Utopial_ENe   | 315 | IKDALESPVQ-----    | SQILRAMSRI--                          | KKDLNKLRLSE  | LLPWQKLDALRTFVMSRLDYLRH    | 370 |
| R52_SM        | 308 | VPVGEDNDQ-----     | SPYALIDKV--                           | VSDTKKIADSG  | LFQWQKLAAYKIFIHSLRTFAFRT   | 360 |
| R5            | 317 | TFRSWFRKL-----     | DIKELLQMM--                           | MDETCLITESN  | LHPQKQIHAYETFIHSQLPFFHLRH  | 369 |
| R51_SM        | 305 | VDFGQKGKH-----     | NIDTILNTA--                           | LDDTTKILSSD  | LHPAQKLAQYKTFIHSRLIFPFRN   | 357 |
| LIN9_SM       | 307 | VRIQDTKKK-----     | DLNVRFEEV--                           | KKKTTAIFKSK  | LRSDQKLAAYKIFIHSLRTFAFRT   | 359 |
| R4_Hmel       | 313 | FQQAQKIQKK-----    | QTKIELTNKF--                          | KFRNLQILRSQ  | LNSRNIKAINTYAIPIITYSFAI    | 367 |
| R42_AS        | 327 | IDQKFLATKN-----    | ALQRFESL--                            | FNRAAIFRSD   | LTWRQMSNAFQSIAGGLRYGFLN    | 380 |
| R4_AL         | 324 | VEQRLLPMEV-----    | ALKEFEDKF--                           | MDRAETIFASE  | LTWGQMATAYNITIAIAGLRYYSN   | 377 |
| R45_BX        | 316 | IESGFVANE-----     | SAYSRMQTTI--                          | LAKVQSILDV   | EGHTVQRRRIARTVAPGGAFFILGNI | 377 |
| HERO1_BF      | 307 | RLYTILKVFLO-----   | KRGQELVKQA--                          | VEGLRAIDKCE  | LPGKLVKVCQSVLIPRLKWPMMKM   | 361 |
| HEROTn        | 309 | KMFDDGSLKY-----    | FSIRETNDQL--                          | GHWLTLDVDSG  | LPGKFKAWVYQHGILPRILWPLLV   | 363 |
| HERO1_SP      | 312 | RLIDGNLKD-----     | VARQDMVSL--                           | GRWLHTIDKCV  | LTGVMKCIYQYLVIPRMQWKLMI    | 366 |
| HERO1_HR      | 318 | KIYDGLKDT-----     | KAKEEMVSKL--                          | TRLLKRTTDLK  | VSTQMKLVQLRRFIPSQLKFELRS   | 372 |
| HERO3_BF      | 307 | GYITFLSKTK-----    | ETYDILAKTI--                          | ETTVENINKSA  | IRNEYKLRYVMEYAFPSWRYMLMV   | 361 |
| R44_Sra       | 295 | VYENNKATAC-----    | INAEQLMLKL--                          | DEKMDKIFNSK  | LVNKNIIKAINGCVIPTCTYLFSH   | 350 |
| Consensus_aa: |     | h.h.s.....p.h..... | hp.l.ps..Lps..p+h.hlp.hhhsp.h@.h..... |              |                            |     |
| Consensus_ss: |     | eee                | hhhhhhhh                              | hhhhhhhh     | hhhhhhhhhhhhhhhhhhhhhh     |     |

|                       |         |                   |               |                              |     |
|-----------------------|---------|-------------------|---------------|------------------------------|-----|
| Conservation:         | 11 1 31 | 141 421           | 3312213       |                              |     |
| 6arl_chainD_p001      | 326     | --VETPSVLQT-----  | IEGWIRRR----- | LRLCQWLQWKRVRTRIRELRALGLKETA | 370 |
| SLACS                 | 334     | DMQHTHRVASW-----  | FDERTTQV----- | MEHILGQ-----                 | 359 |
| CRE1                  | 342     | SPQELETAAKT-----  | ADDEVEQT----- | LQHLMGQ-----                 | 367 |
| CRE2                  | 344     | KPEELNRSTTW-----  | FDERVMET----- | ALNIAINI-----                | 369 |
| GAU97528_Ramazzottius | 367     | TNTILKVFLO-----   | VDKIVKST----- | VREILQL-----                 | 392 |
| Blag_1                | 361     | LKKLPKAKFLSD----- | ADVLIKT-----  | LKEVLQL-----                 | 386 |
| Blag_5                | 363     | LNKIPNKFIEA-----  | ADKIIKSG----- | LKEILQL-----                 | 388 |
| Blag_2                | 362     | LQTIPLQFLHT-----  | ADKLVRST----- | LKDILQL-----                 | 387 |
| Blag_4                | 363     | VHKLPPLTFLED----- | VDKLIRSA----- | VKEMLLL-----                 | 388 |
| Blag_3                | 361     | LDKIPSSFLQD-----  | IDKLLRSS----- | IKELIGL-----                 | 386 |
| Blag_6                | 363     | LCKLQLGFLQD-----  | IDKIVKNA----- | VKEIVGL-----                 | 388 |
| R2_PS                 | 346     | -QGISVGLLRS-----  | ADKQVRAA----- | ARKILHL-----                 | 370 |
| RaR2                  | 354     | -SKTTAKGLKR-----  | TDQRIRQY----- | VRRWLKL-----                 | 378 |
| R8HmA                 | 360     | -SECGISELRS-----  | WTRFVRNW----- | AKNI IHL-----                | 384 |
| R8HmB                 | 359     | -SGGICELRK-----   | WSRFVRGW----- | VKSIIHF-----                 | 383 |
| R24_MR                | 355     | -SSITAGRLEY-----  | MDRLIRKF----- | IKKTLHL-----                 | 379 |
| R21_MR                | 355     | -MDVNKKKLT-----   | LDGCIKVF----- | VKETLHL-----                 | 379 |
| R2SmA                 | 350     | -GIVHLKTLKS-----  | MDRNIHTA----- | IRKWLRL-----                 | 374 |
| R2NS1_CSi             | 350     | -GQVHRNTLKR-----  | LDNYIRQS----- | IRGWLRL-----                 | 374 |
| R2CiB                 | 358     | -SSCAKRALTY-----  | LDKSVRSA----- | IRRWLTL-----                 | 382 |
| R2NvecA               | 358     | -SRTTGKLLNS-----  | LDALVRKA----- | VRGWLKL-----                 | 382 |

|               |     |                 |                       |              |            |     |
|---------------|-----|-----------------|-----------------------|--------------|------------|-----|
| R21_MDe       | 353 | -GRVNKTKLAG     | -----FDNLIRKY         | -----VRKWL   | YL-----    | 377 |
| R2A_NVi       | 353 | -GRTSNADVRR     | -----GDKIIRKT         | -----VRGWL   | RL-----    | 377 |
| R21_TCAs      | 354 | -PQVTSRVLRE     | -----ADRLIRRH         | -----LKTY    | YHL-----   | 378 |
| R2LcA         | 357 | -SKTNLKELNT     | -----LDRAIRVF         | -----LRTL    | LYL-----   | 381 |
| R2Ll          | 357 | -SRTNLKELNT     | -----LDRAIRVF         | -----IRTL    | LHL-----   | 381 |
| R2La          | 357 | -SRVAIGELKI     | -----MDKLILKH         | -----LRVWL   | RL-----    | 381 |
| R2LcB         | 357 | -SRVAIGELKI     | -----MDKLILKH         | -----LRVWL   | RL-----    | 381 |
| R2NS1_SMed    | 351 | -GNTNVGELKD     | -----LDKMT RVA        | -----IRKWL   | HL-----    | 375 |
| R21_PPap      | 354 | -GRYTRKTYKA     | -----MDAQIRSY         | -----VRKWL   | HL-----    | 378 |
| R22_TCAs      | 344 | -GRLNAGVLR      | -----LDVVVRTS         | -----VRTWL   | RL-----    | 368 |
| R21_PBa       | 357 | -GTITSKILKE     | -----MDVLLRAA         | -----VRRWL   | RL-----    | 381 |
| R28_MR        | 354 | -GRITLGGALRA    | -----LDVLTAA          | -----VRKWL   | RL-----    | 378 |
| R27_MR        | 352 | -SRTTLGHLRG     | -----LDLQVRAA         | -----VRRWL   | SL-----    | 376 |
| R21_IS        | 354 | -GPWSAALLLK     | -----MDTTIRGA         | -----IRRWM   | DL-----    | 378 |
| R21_RMi       | 355 | -GPISAKTLLT     | -----IDRVV RSA        | -----VRRWL   | LAL-----   | 379 |
| R2_FA         | 356 | -GGSNLSLLKK     | -----IDL MVRAA        | -----GRKWC   | CL-----    | 380 |
| R25_MR        | 354 | -GNVTLSLLRK     | -----VDKL VRAA        | -----VRKWL   | DL-----    | 378 |
| R2_Dan        | 355 | -GSVTIGVLKK     | -----FDKLVR YT        | -----ARKWL   | GL-----    | 379 |
| R2_DSi        | 355 | -GSVAIGVLRK     | -----TDKLIRY          | -----VRRWL   | NL-----    | 379 |
| R2B_DM        | 354 | -GSVALGVLRK     | -----CDKLVR SF        | -----ARKLL   | GL-----    | 378 |
| R2_DPe        | 355 | -GSVMIGVLRK     | -----CDILVR ST        | -----VRKWL   | GL-----    | 379 |
| R2_BM         | 354 | -GNISDDR LRM    | -----LDVQIRKA         | -----VGQWL   | RL-----    | 378 |
| R2C_NGi       | 355 | -GSSTAGYLR      | -----LDCVIRAY         | -----VRRWL   | RL-----    | 379 |
| R2_AM         | 354 | -APIRASMLNK     | -----LDRMVRVA         | -----LTGKD   | GI-----    | 378 |
| R2CiD         | 357 | -TRVTVSFLSW     | -----IDRVV MR         | -----VRAIL   | HA-----    | 381 |
| R21_BTe       | 356 | -SPPSDTVLKL     | -----LDSEVRQE         | -----VKTIL   | HL-----    | 380 |
| R22_MR        | 355 | -SIPSI SVIRQ    | -----LDQCVRVA         | -----VKEYL   | HL-----    | 379 |
| R2_KF         | 352 | -GGPSLTR LHA    | -----ADKCVRMA         | -----VKEIL   | HL-----    | 376 |
| R2B_NVi       | 353 | -SPPAKAVLKT     | -----IDRIIRTR         | -----IKEIL   | HL-----    | 377 |
| R2Amel        | 355 | -NPPPLGTLDL     | -----IDKELKT I        | -----IKEIL   | HL-----    | 379 |
| R2_Rm_ribo    | 365 | -AAPALTTLRE     | -----LDQELRVV         | -----VKKIF   | HL-----    | 389 |
| R2_Bg_ribo    | 356 | -SLPSIAELRA     | -----LDLEIRGC         | -----VKQIL   | HL-----    | 380 |
| R2_RU         | 351 | -DPPSPAYLKS     | -----IDHDLRQI         | -----YKNIL   | HL-----    | 375 |
| R2_RL         | 351 | -DPPSPAYLKS     | -----IDHDLRQI         | -----YKNIL   | HL-----    | 375 |
| R2Dr          | 361 | -GGAGDVMLQN     | -----LDGTIRKA         | -----VKKWL   | HL-----    | 385 |
| R21_GA        | 362 | -CMLSAKALTE     | -----MDRSIRQA         | -----VKRWL   | HL-----    | 386 |
| R21_SSa       | 361 | -GGLGPIVLNV     | -----LDGMIRKA         | -----VKVWL   | HL-----    | 385 |
| R2Ola         | 358 | -RKVTVTKLAQ     | -----IDGIVRKA         | -----VKKWL   | HL-----    | 382 |
| R21_Gav       | 361 | -AGIGRVALEA     | -----LDSMNRK          | -----VKEWF   | HL-----    | 385 |
| R21_ZA        | 362 | -SEMKA GALEA    | -----LDQQIRTA         | -----VKDWL   | HL-----    | 386 |
| R21_TG        | 362 | -SEVKTALLET     | -----LDQKIRTA         | -----VKEWL   | HL-----    | 386 |
| R21_GFo       | 362 | -SEMKA GALEA    | -----LDRTIRSA         | -----VKDWL   | HL-----    | 386 |
| R2NS1_CGi     | 364 | -DAYPXXVLGK     | -----LDLIVRAA         | -----IRRWA   | KL-----    | 388 |
| NeSL1_TV      | 361 | -NVFRVNDLKA     | -----TDQMIRGL         | -----IDKEA   | PT-----    | 385 |
| Utopial_ACa   | 372 | -GKIQRGRCQQ     | -----FDRELREN         | -----LRAAL   | RL-----    | 396 |
| Utopial_LV    | 364 | -TEYLKSDLKP     | -----LRAAI IKH        | -----VKKIC   | HL-----    | 388 |
| Utopial_CFl   | 360 | -ATVGKKPLKA     | -----ADLQVRRM         | -----AKSWL   | NL-----    | 384 |
| Utopial_AEc   | 360 | -ARVFKGPLTA     | -----VDLNIRRH         | -----VKSWL   | NL-----    | 384 |
| Utopial_CMy   | 360 | -SAVAKVPLNK     | -----ADKIVRQL         | -----VKKWL   | FL-----    | 384 |
| UtopialB_CPB  | 360 | -SAVAKVPLNK     | -----ADSTIRQL         | -----VKKWL   | YL-----    | 384 |
| Utopial_ENe   | 371 | -CYPYKQQLVA     | -----FDVYVRAA         | -----LKAAF   | KL-----    | 395 |
| R52_SM        | 361 | -REIKTMALSA     | -----SQGNTNSCGN       | NSSKLRGHLR   | IRLNL----- | 395 |
| R5            | 370 | -SRIPFSDFITNRKT | TKNTTNSNDSEKSIQKAYDPE | --SGQLFLNT   | FAL-----   | 415 |
| R51_SM        | 358 | -CNINHMTLDT     | -----NRNRTVQH         | -----REKQL   | GF-----    | 382 |
| LIN9_SM       | 360 | -EDIAKTKIET     | -----YDEEIKKM         | -----IKEDIL  | K-----     | 384 |
| R4_Hme1       | 368 | -INWSQTDLN      | -----LQRIINTH         | -----MTTHR   | KH-----    | 392 |
| R42_AS        | 381 | -TNGAGQKLSE     | -----ALKHARDI         | -----DVRIR   | SL-----    | 405 |
| R4_AL         | 378 | -TNGASPKLLE     | -----ALKRAATL         | -----DTRIR   | DL-----    | 402 |
| R45_BX        | 378 | QPNSAKADMLK     | -----LDMVIREK         | -----IRRKGL  | L-----     | 403 |
| HERO1_BF      | 362 | -YDIPLSTADQ     | -----VEGKANSF         | -----VRKWL   | GV-----    | 386 |
| HEROTn        | 364 | -YEFPISTVEG     | -----LERRVSSC         | -----LRRWL   | GL-----    | 388 |
| HERO1_SP      | 367 | -YDVPVSQVEK     | -----METLVSKK         | -----LRRWL   | GA-----    | 391 |
| HERO1_HR      | 373 | YNLSLTWIKNN     | -----LDNMVTEA         | -----VRDWL   | TM-----    | 398 |
| HERO3_BF      | 362 | -HDLTDTQLQK     | -----LDSIHTKA         | -----IKTWL   | RL-----    | 386 |
| R44_SRa       | 351 | -EFS-DEERIQ     | -----LARNVDIR         | -----IRSYM   | NT-----    | 374 |
| Consensus_aa: |     | .....lp.....    | h-...lp.h.....        | l+phh.h..... |            |     |
| Consensus_ss: |     | hhhhhh          | hhhhhhhh              | hhhhh        |            |     |

## Supplementary Figure 6

Alignment of amino acid sequences used to construct a phylogenetic tree. PROMALS3D (PROfile Multiple Alignment with predicted Local Structures and 3D constraints) software was used. The resulting alignments in FASTA format and with the predicted secondary structures are shown in Figures A and B, respectively.
